# Supplementary material for: A significant role of alkaline cations on the Reimer–Tiemann reaction
Source: Royal Society of Chemistry journal article supplement (doi:10.1039/c1ob05405h), 2011-01-01
Supplement: c1ob05405h.pdf [file c1ob05405h.pdf]

## Supporting Information

A significant role of alkaline cations on the Reimer-Tiemann reaction.

Shinichi Yamabe and Takeshi Fukuda

Department of Chemistry, Nara University of Education, Takabatake-cho, Nara-shi, 630-8528, Japan.

E-mail: yamabes@nara-edu.ac.jp

|                                                                                                                                                                                                                                                                                                                                                                                                                                                                                     | Page   |
|-------------------------------------------------------------------------------------------------------------------------------------------------------------------------------------------------------------------------------------------------------------------------------------------------------------------------------------------------------------------------------------------------------------------------------------------------------------------------------------|--------|
| I. Figure S1                                                                                                                                                                                                                                                                                                                                                                                                                                                                        | S4     |
| <p>By the use of the assumed initial geometry of <math>\text{CCl}_2(\text{H}_2\text{O})_{14}</math>, the optimization was conducted to give <math>\text{CO} + (\text{H}_3\text{O}^+)_2 + (\text{Cl}^-)_2 + (\text{H}_2\text{O})_{11}</math>.</p>                                                                                                                                                                                                                                    |        |
| II. Figure S2                                                                                                                                                                                                                                                                                                                                                                                                                                                                       | S5-S13 |
| <p>All the geometries of Figure 1 for the <math>\text{Na}^+</math>-containing R-T reaction.</p>                                                                                                                                                                                                                                                                                                                                                                                     |        |
| III. Figure S3                                                                                                                                                                                                                                                                                                                                                                                                                                                                      | S14    |
| <p>(a) An optimized geometry of the <math>\text{Na}^+\dots\text{PhO}^-</math> complex in the hexagonal pyramid coordination. <math>\Delta\text{E}</math>s are the binding energies composed of the B3LYP/6-31(+)<math>\text{G}(\text{d})</math> zero-point vibrational energies and the electronic energies of B3LYP/6-31(+)<math>\text{G}(\text{d})</math>, B3LYP/6-311+<math>\text{G}(\text{d},\text{p})</math> or B3PW91/6-311++<math>\text{G}(2\text{df},2\text{p})</math>.</p> |        |

They are only ca. 6 kcal/mol smaller than that of the  $\text{PhO}^- \dots \text{Na}^+$  coordination.

(b) Charge-transfer (CT) interactions to make the hexagonal pyramid coordination stable.

#### IV. Figure S4

S15-S21

Geometries in the R-T reaction with  $\text{K}^+$ , which correspond to those in Figure 1 (with  $\text{Na}^+$ ).

The step of  $\text{Int4}(\text{K}^+)$  to  $\text{Int6}(\text{K}^+)$  via  $\text{TS4}(\text{K}^+)$  was obtained. That is,  $\text{Int5}(\text{K}^+)$  of the  $\text{C}_6\text{H}_4(\text{CHCl}_2)\text{-O}^-$  form dose not intervene in the  $\text{K}^+$  containing reaction.

#### V. Figure S5

S22

Three TS geometries obtained by two computational methods.

#### VI. Figure S6

S23

Energy changes along the paths in Figure 1 and Figure S4. Relative Gibbs free energies of RB3LYP/6-311+G(d,p) SCRF=PCM // RB3LYP/6-31(+)+G(d) are shown in Table S1 (without square brackets).

#### VII. Table S1

S24

Changes of Gibbs free energies in kcal/mol ( $T=298.15\text{K}$   $P=1\text{atm}$ ). Values without square brackets are of RB3LYP/6-311+G(d,p) SCRF=PCM // RB3LYP/6-31(+)+G(d). Those with

square brackets are of RB3LYP/6-311+G(d,p) SCRF=PCM // RB3LYP/6-31+G(d), which are shown in Figure 2.

VIII. Table S2.

S25-S65

Cartesian coordinates of the B3LYP /6-31(+G(d) and B3LYP /6-31+G(d) optimized geometries which are shown in Figure 1 and Figure S2.

The initial geometry

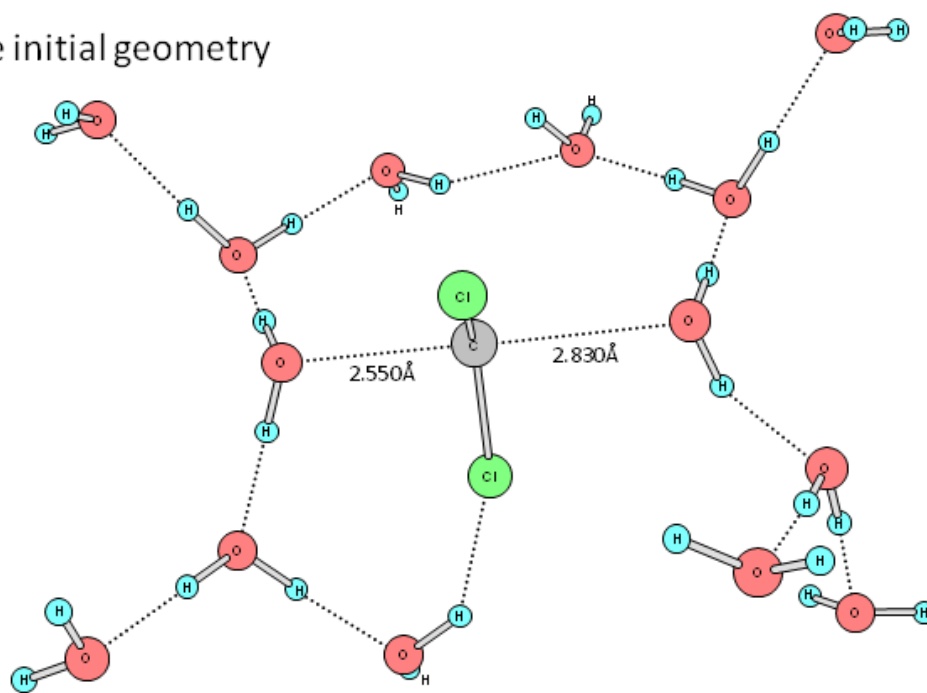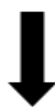

The optimized one

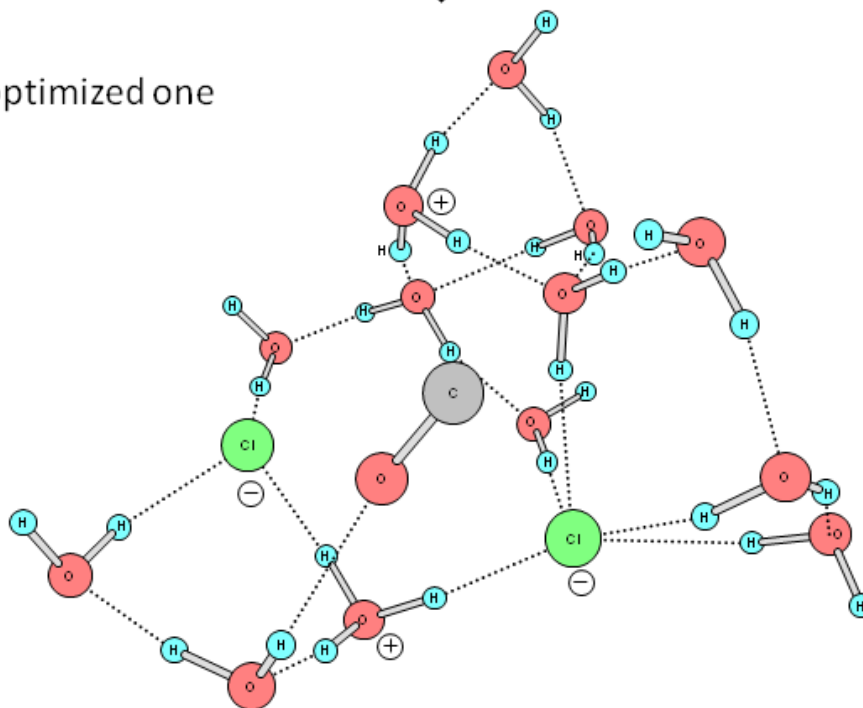

(Figure S1)

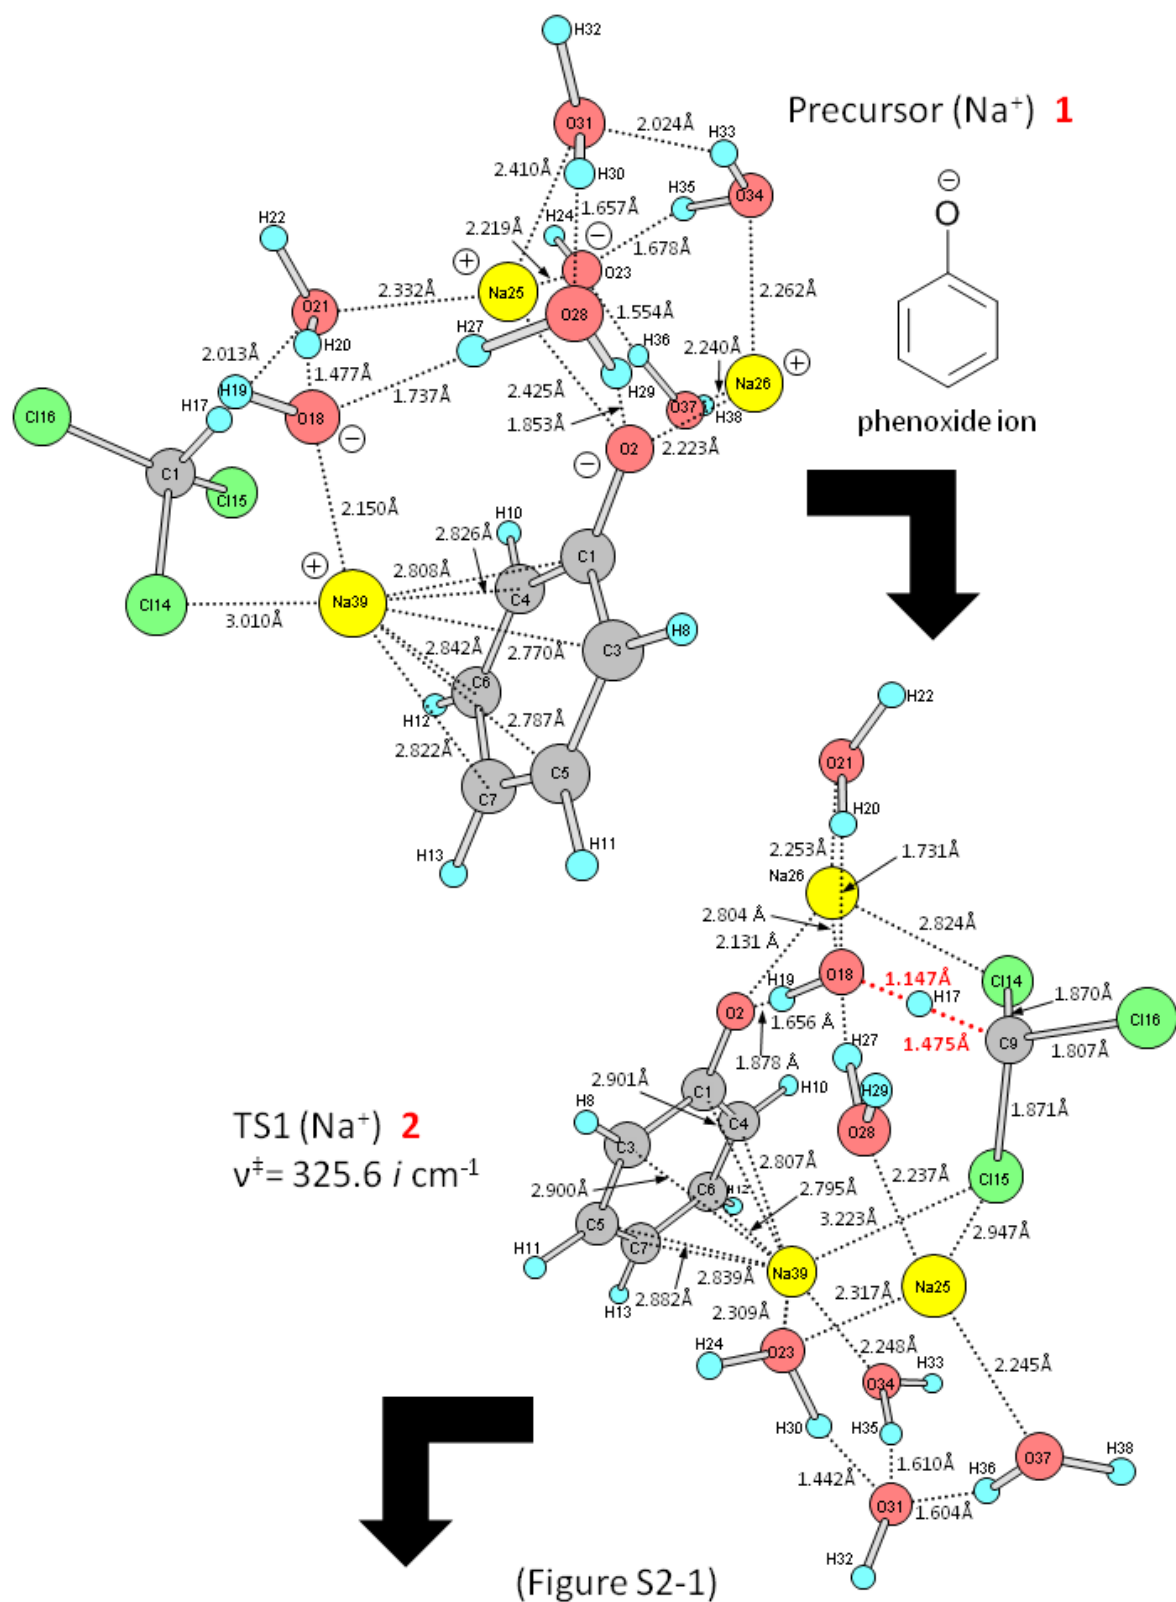

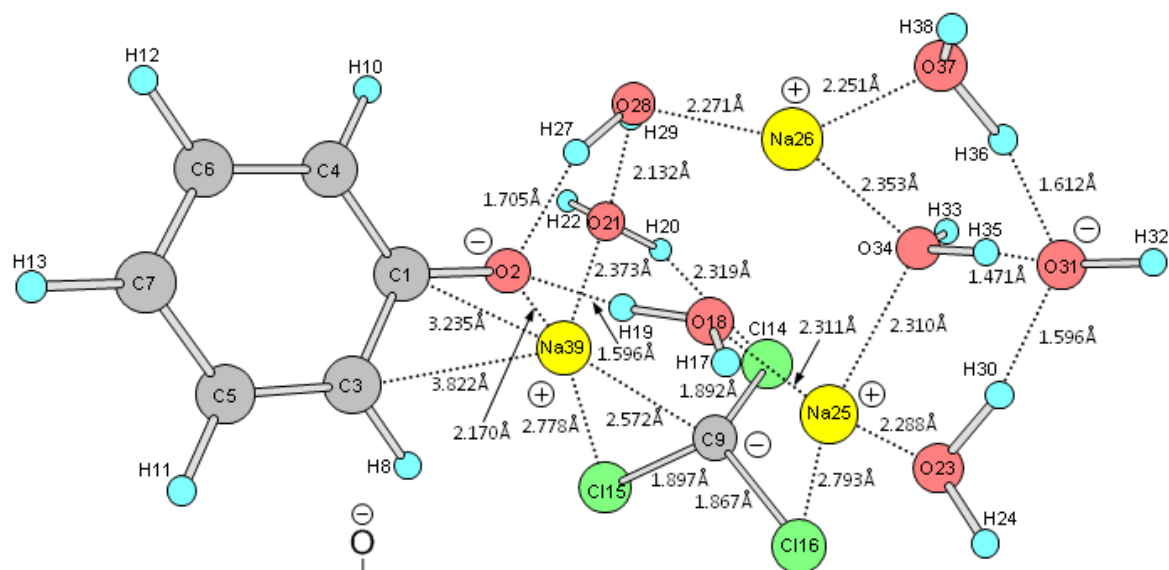

Int1(Na<sup>+</sup>) 3

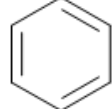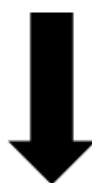

Int2 (Na<sup>+</sup>) 4

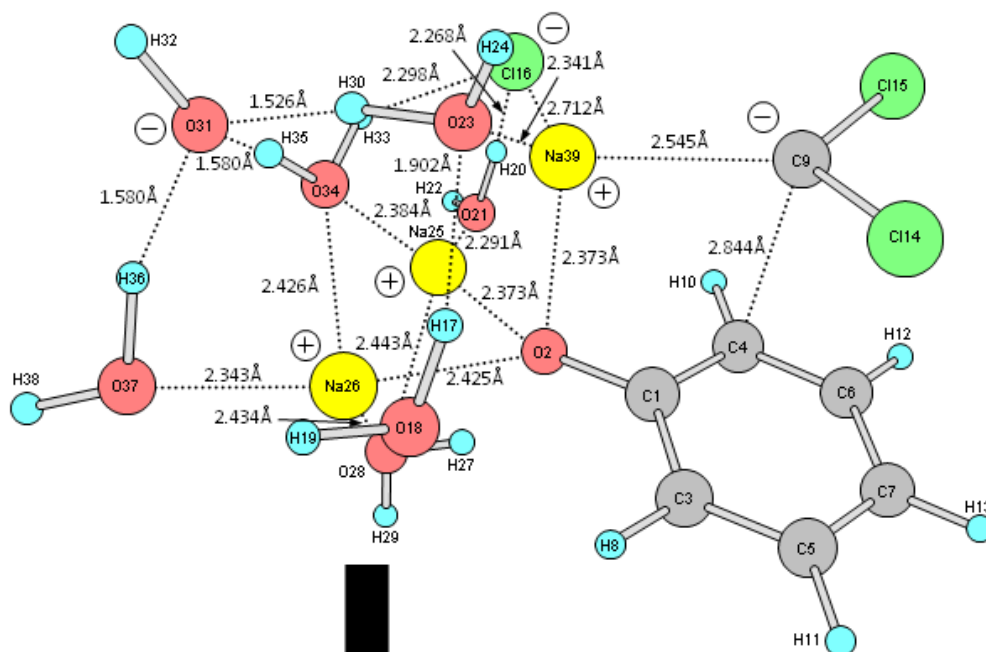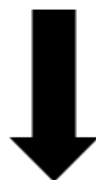

(Figure S2-2)

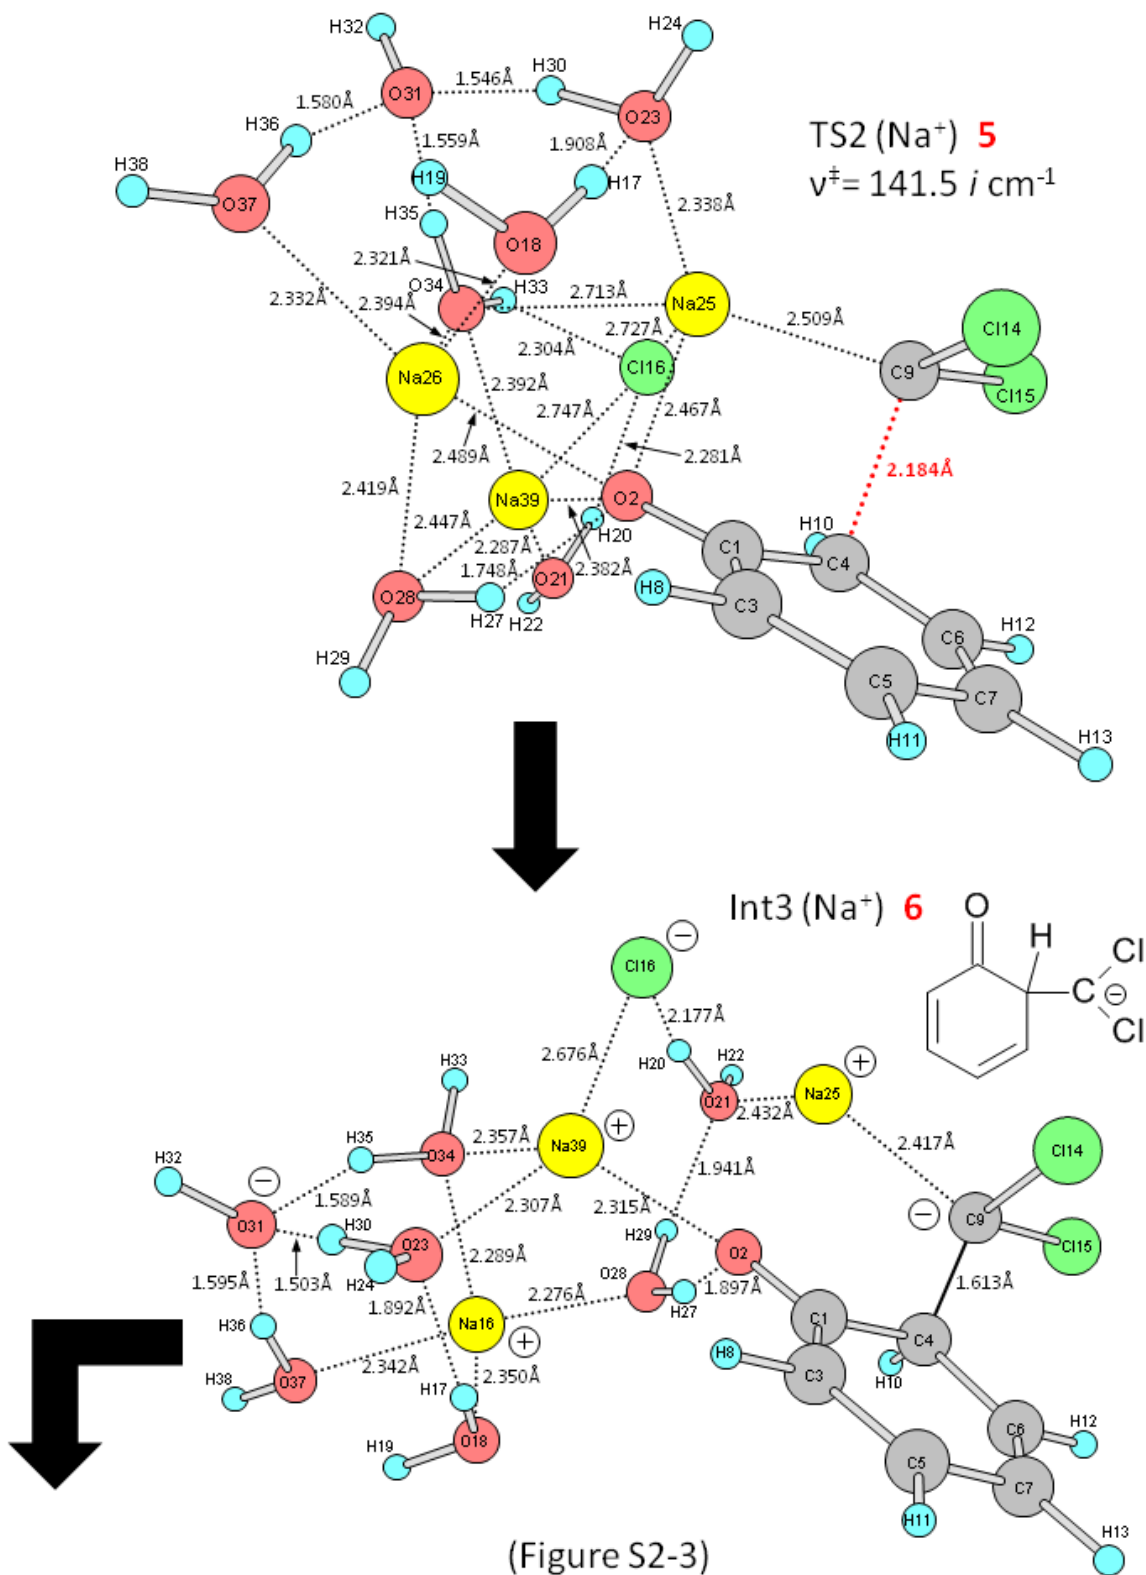

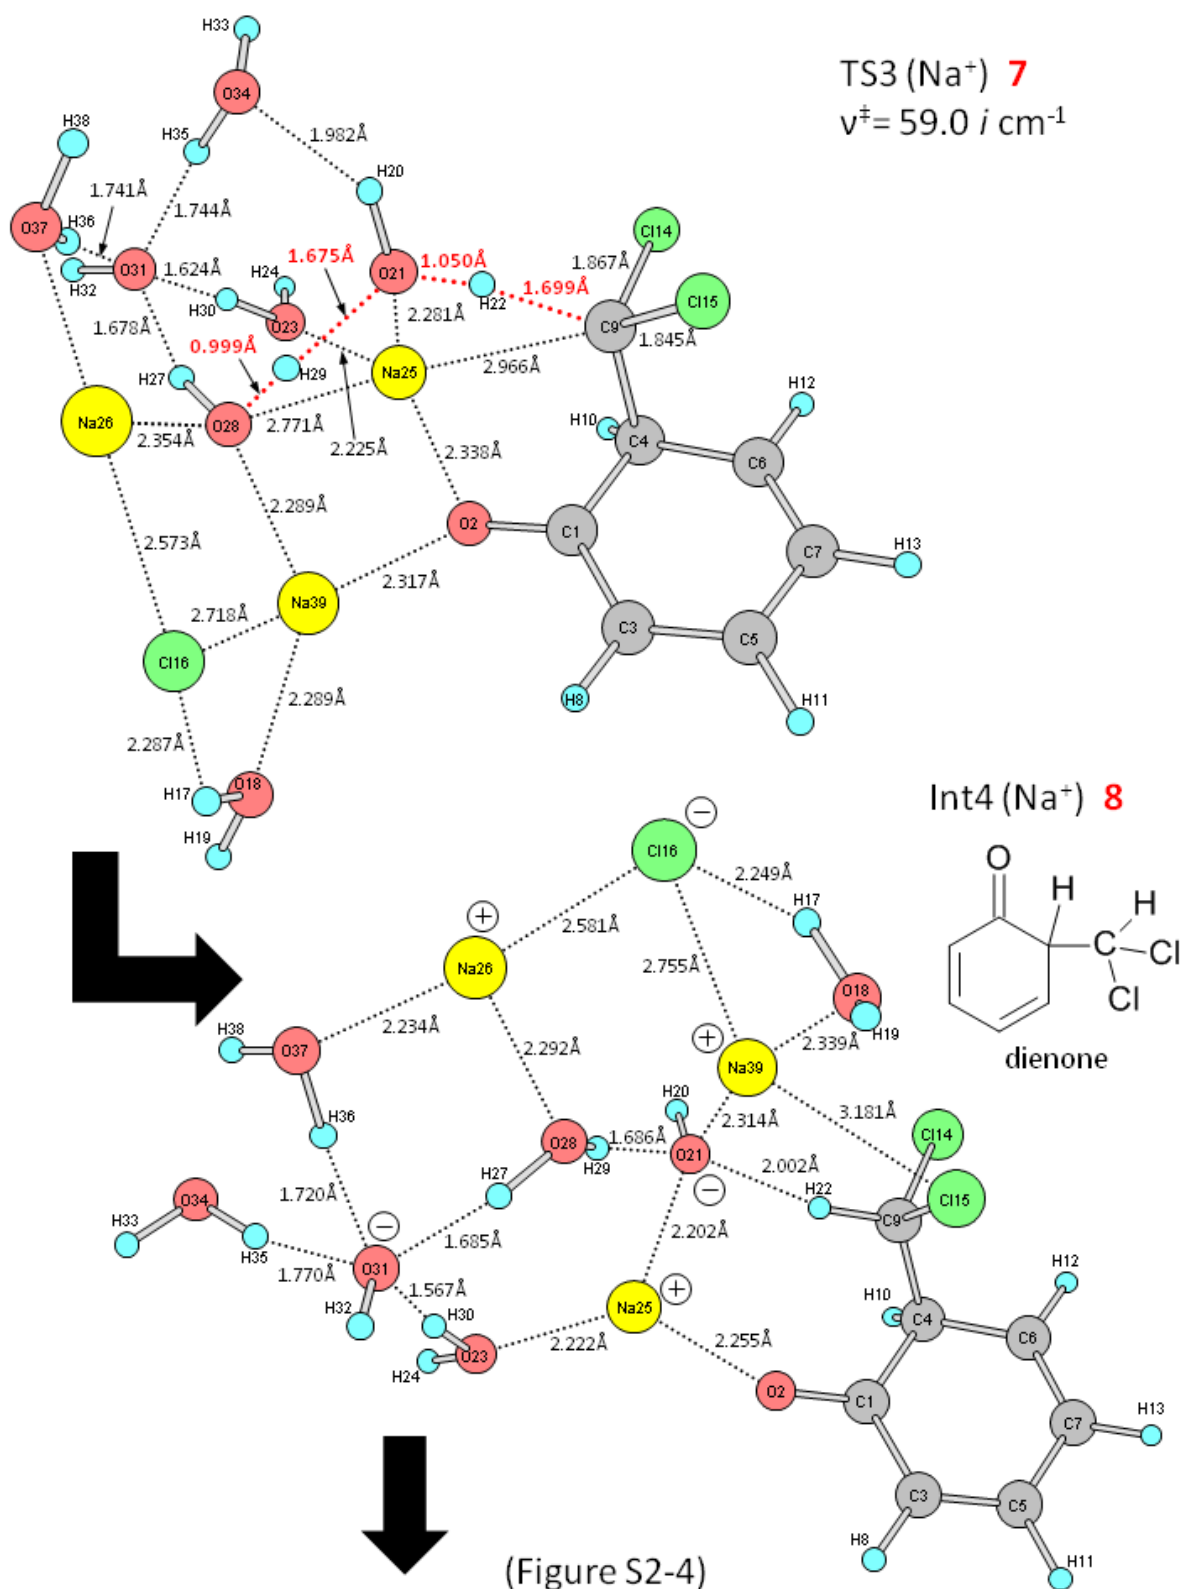



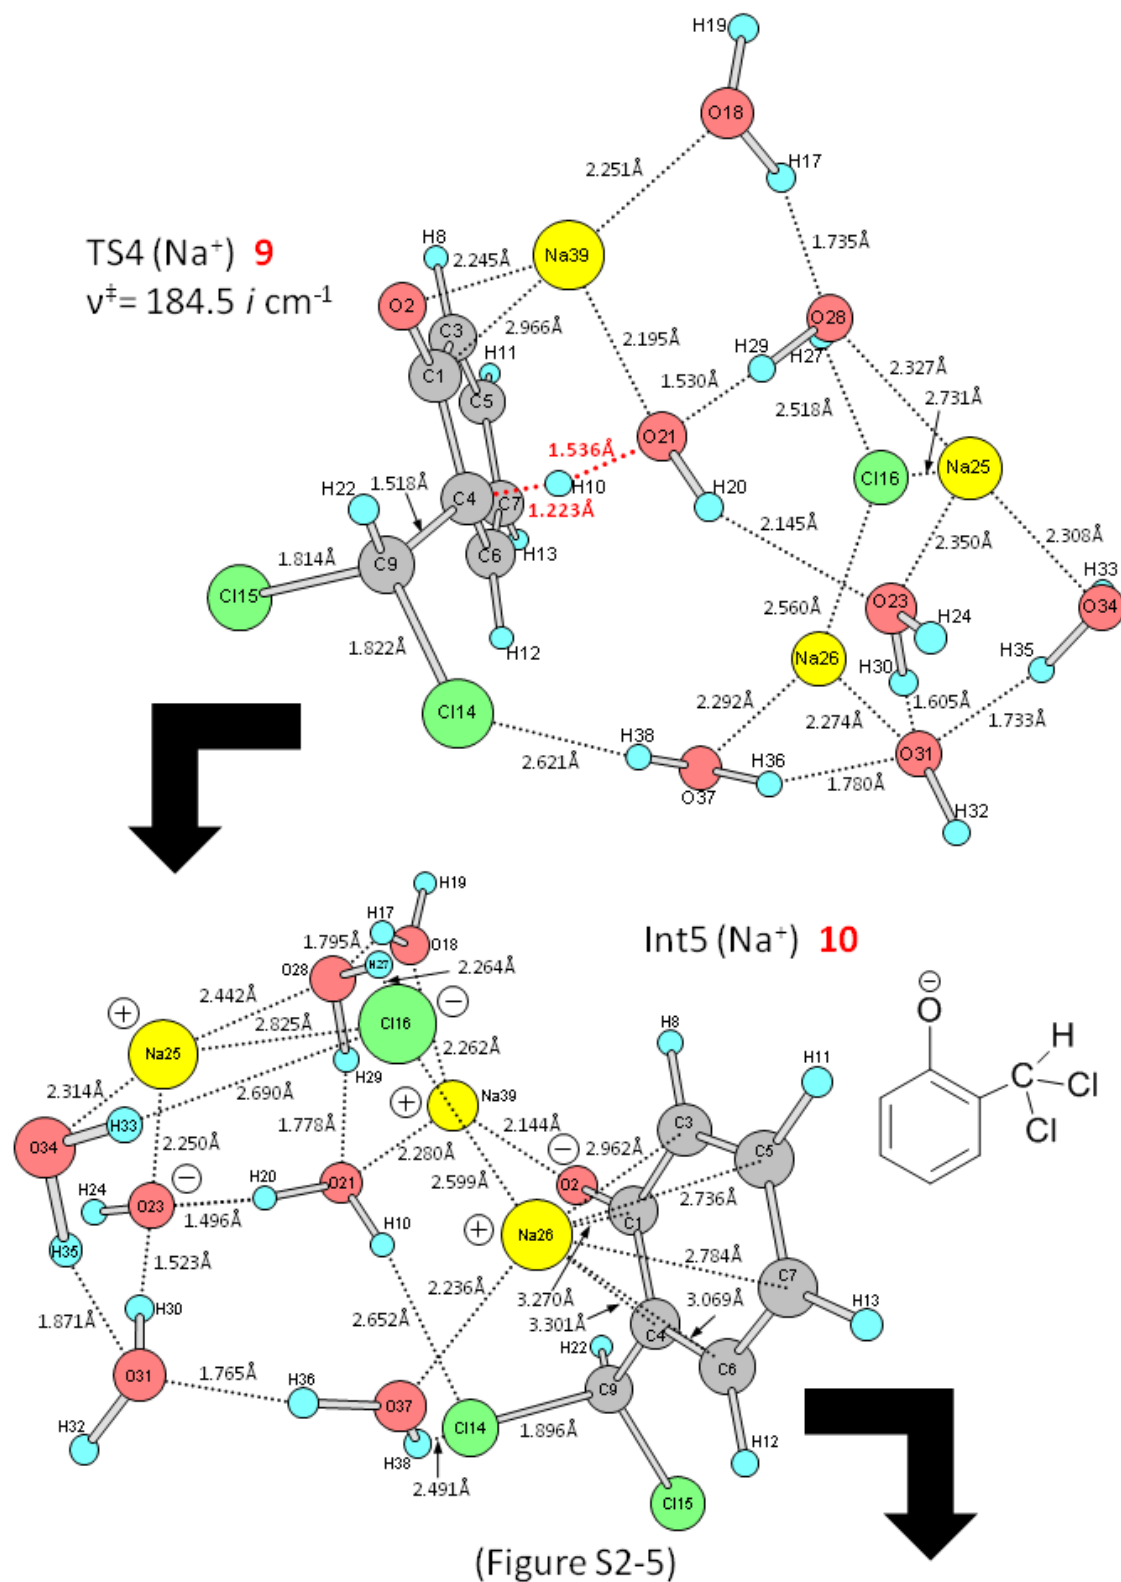

TS5 (Na<sup>+</sup>) **11**  
 $\nu^\ddagger = 75.5 \text{ i cm}^{-1}$

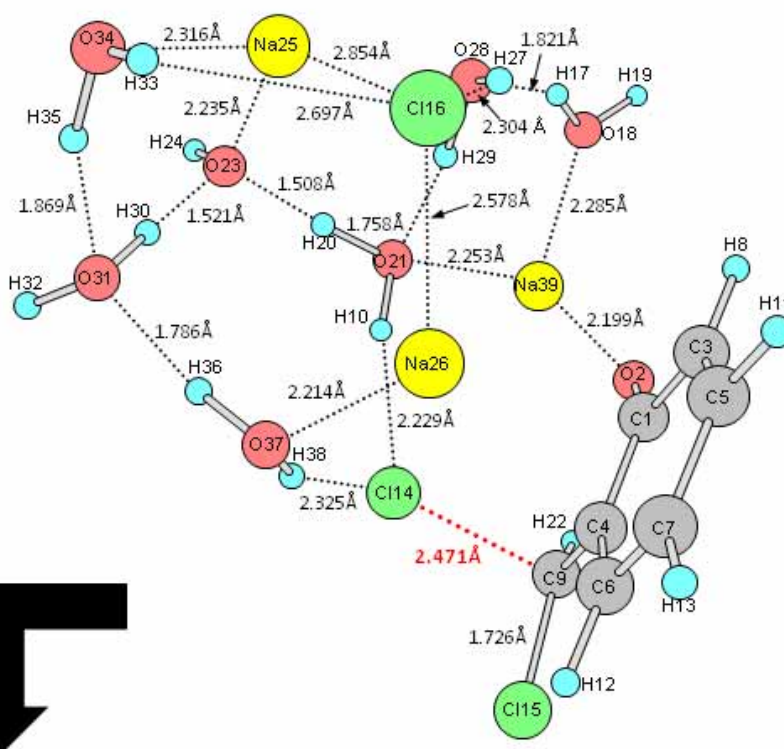

Int6 (Na<sup>+</sup>) **12**

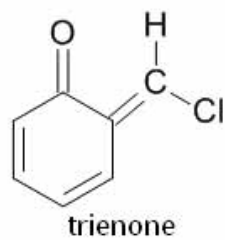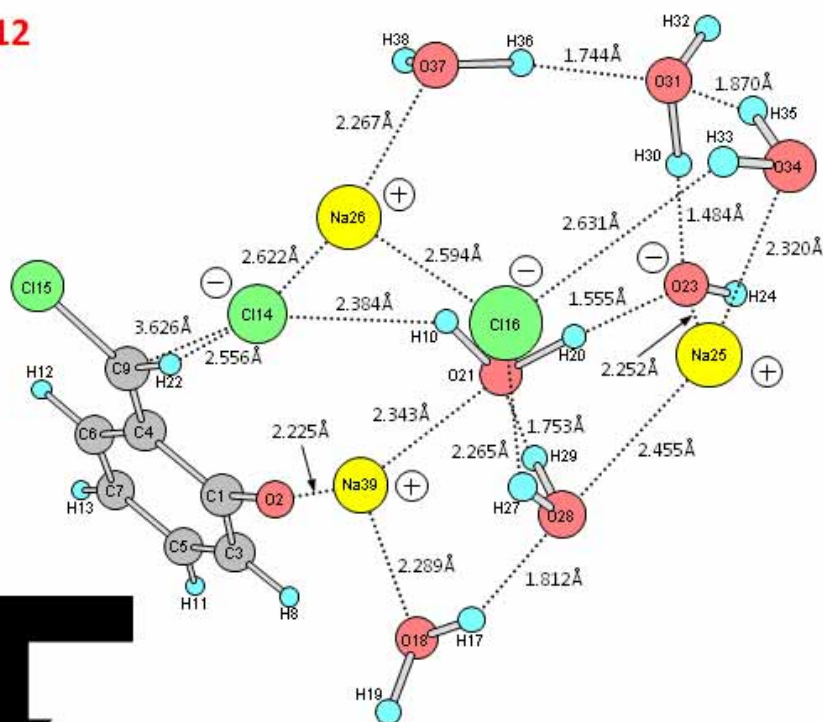

(Figure S2-6)

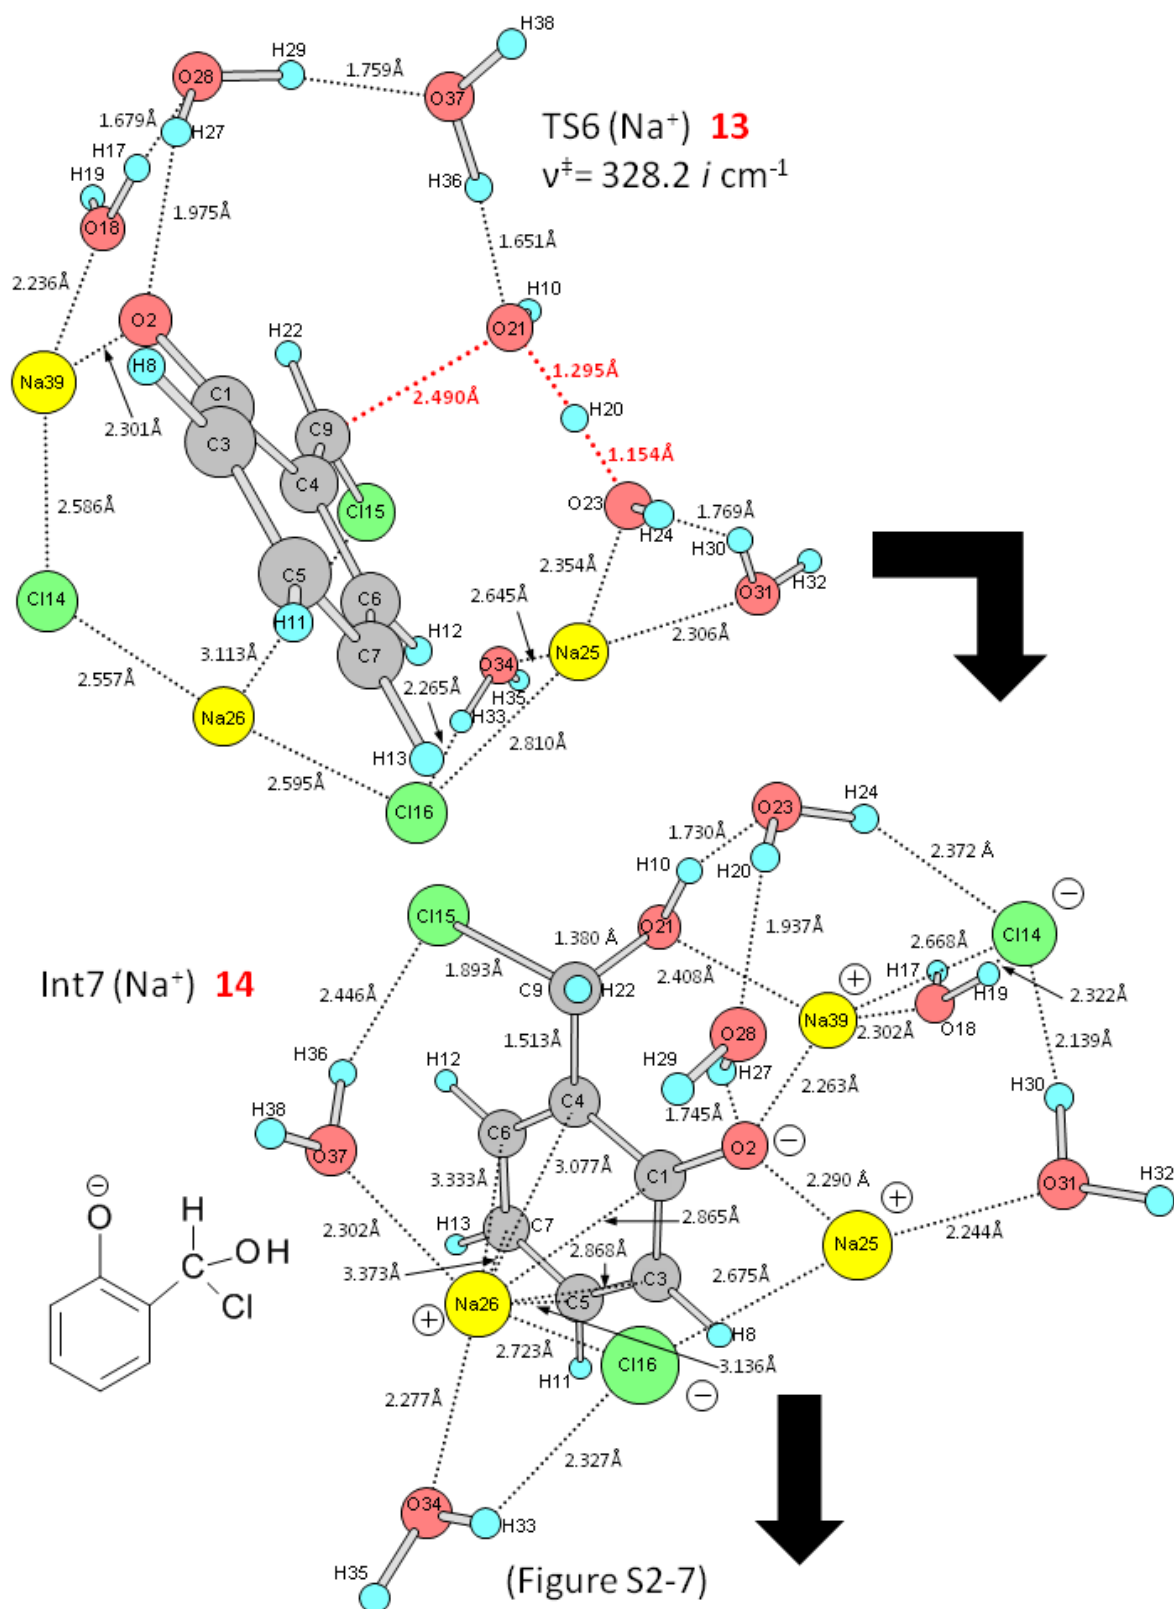

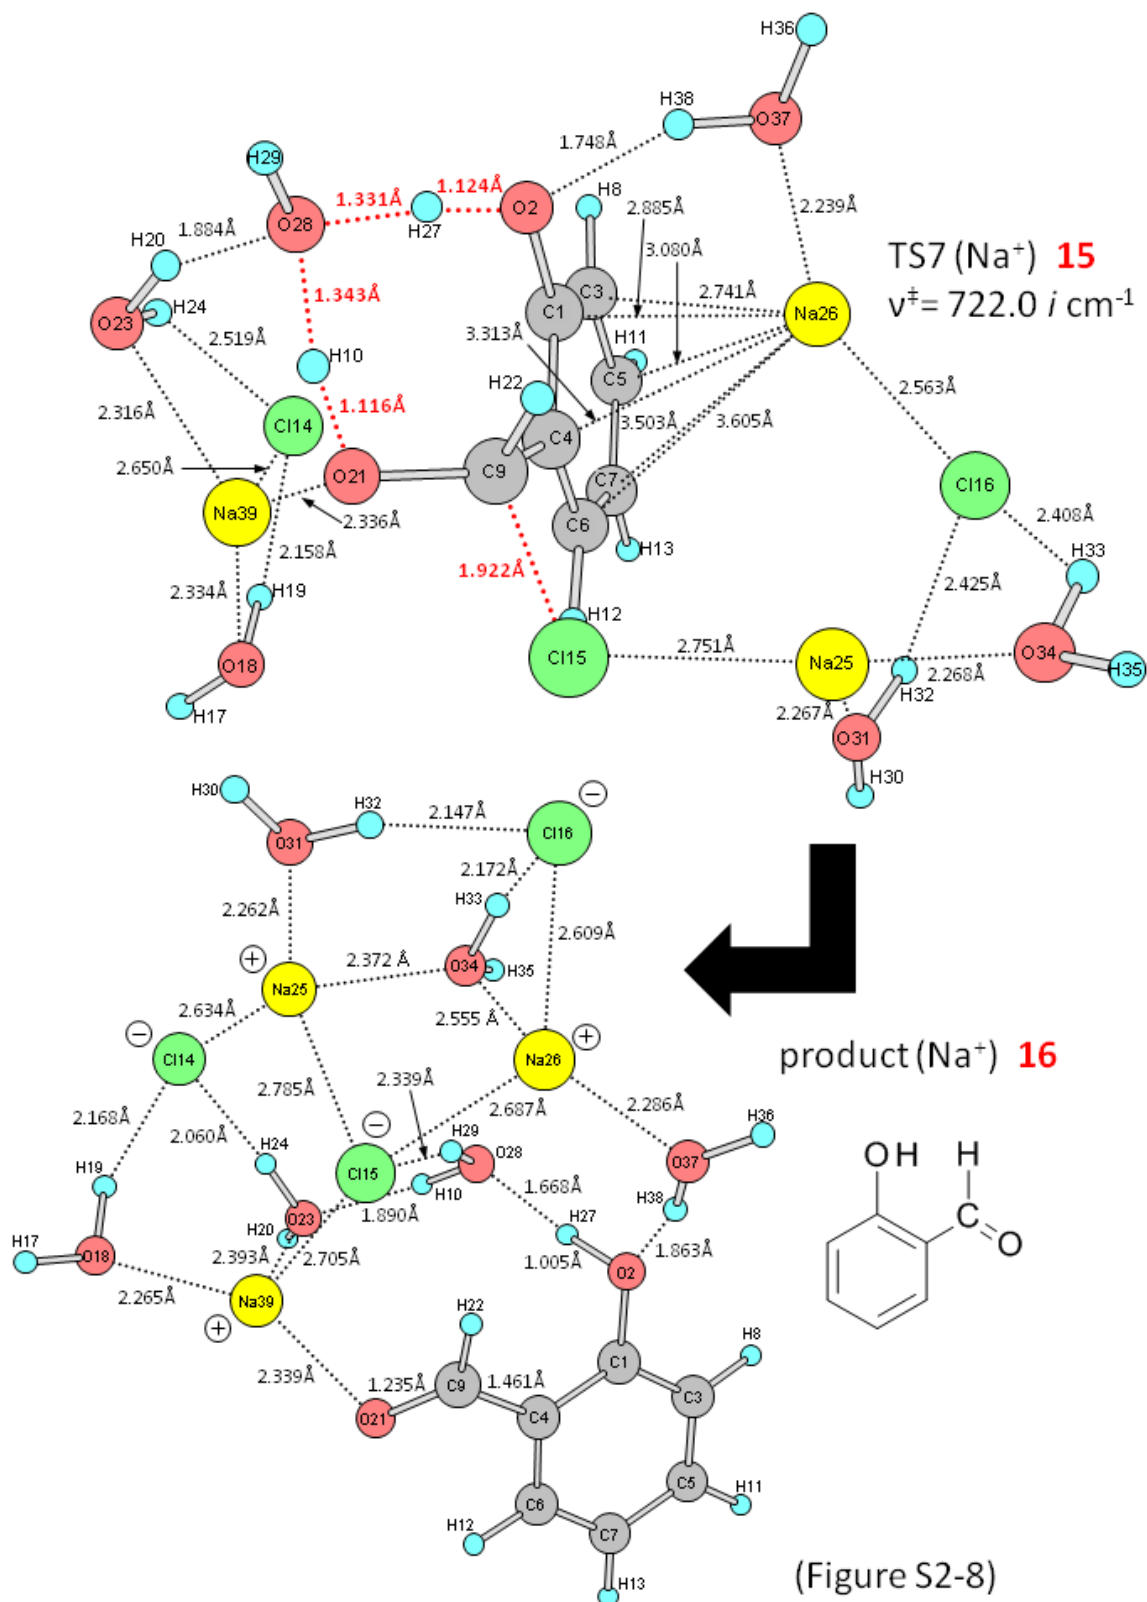

TS8 (Na<sup>+</sup>) **17**

$v^\ddagger = 1064.4 \text{ i cm}^{-1}$

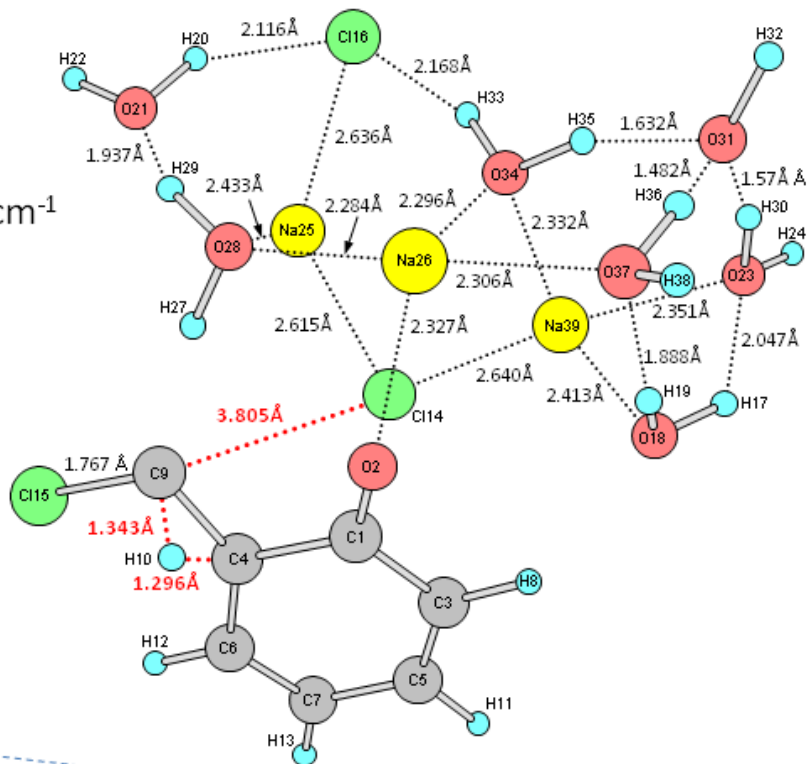

TS9 (Na<sup>+</sup>) **18**

$v^\ddagger = 117.3 \text{ i cm}^{-1}$

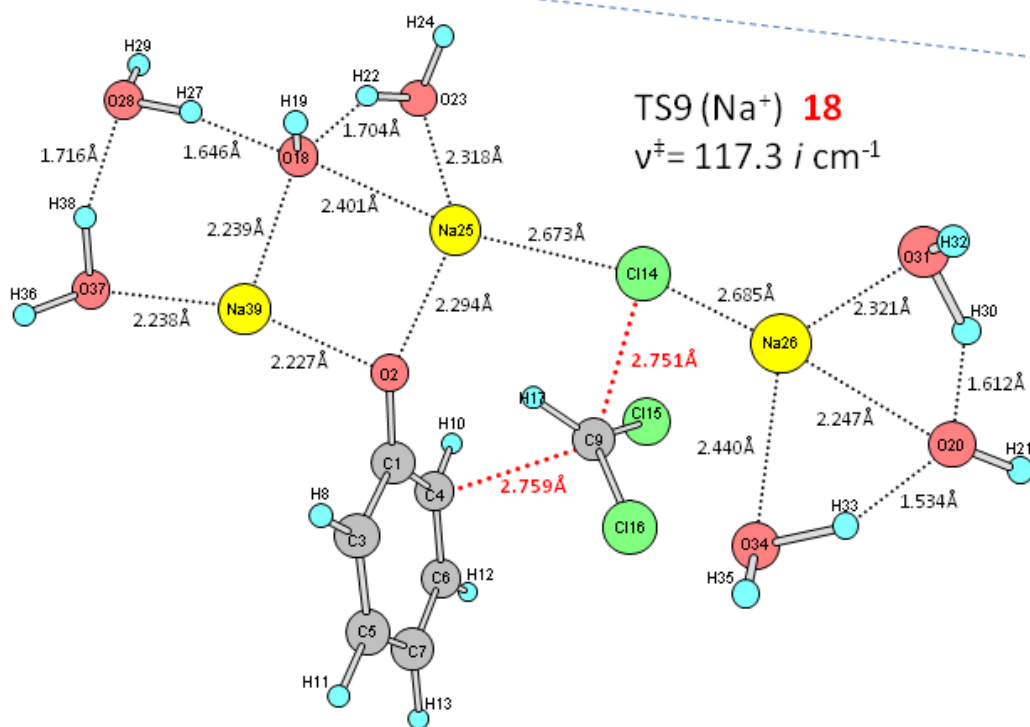

(Figure S2-9)

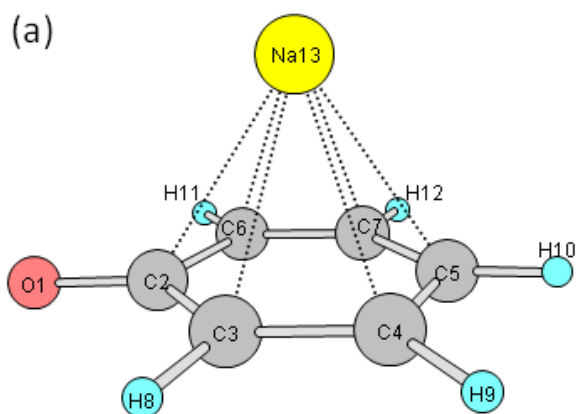

$\Delta E =$  a) +125.76 kcal/mol

b) +118.52 kcal/mol

c) +118.93 kcal/mol

a) B3LYP/6-31(+)(d) // B3LYP/6-31(+)(d)

b) B3LYP/6-311+G(d,p) // B3LYP/6-31(+)(d)

c) B3PW91/6-311++G(2df,2p) // B3LYP/6-31(+)(d)

(b)

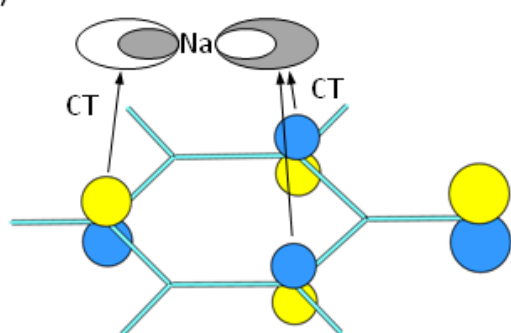

occupied MO no. 25 (HOMO)  
eigenvalue: 2.121 eV; symmetry: A

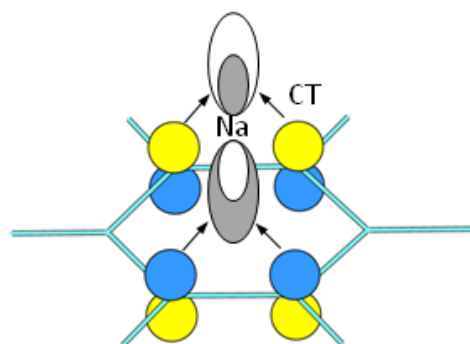

occupied MO no. 23 (HOMO-2)  
eigenvalue: -1.995 eV; symmetry: A

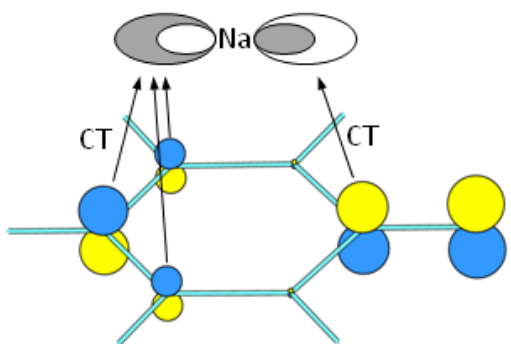

occupied MO no. 22 (HOMO-3)  
eigenvalue: -3.630 eV; symmetry: A

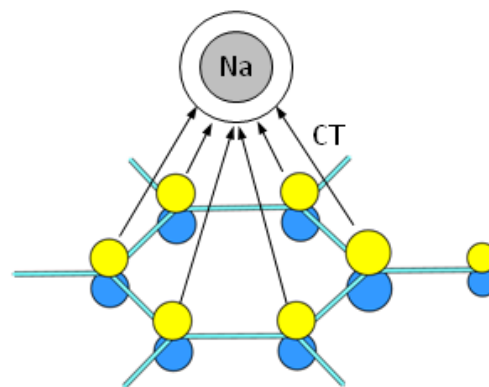

occupied MO no. 19 (HOMO-6)  
eigenvalue: -6.667 eV; symmetry: A

(Figure S3)

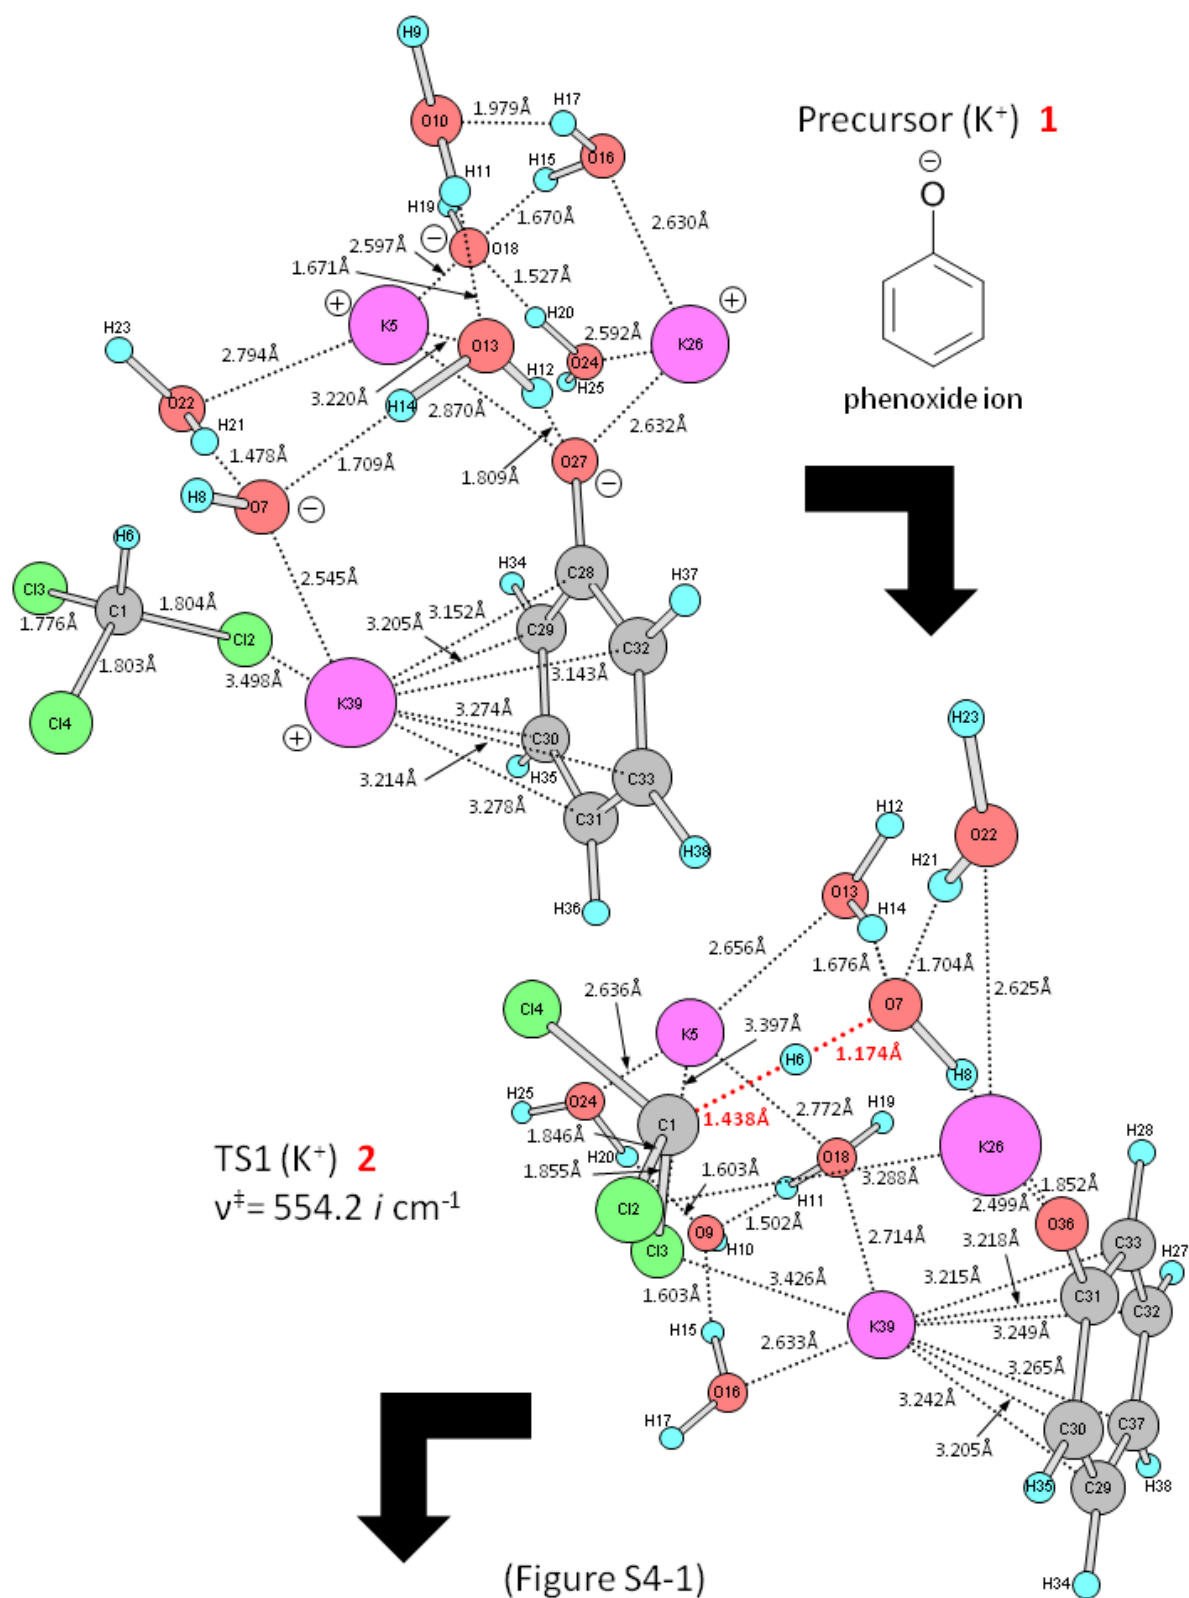



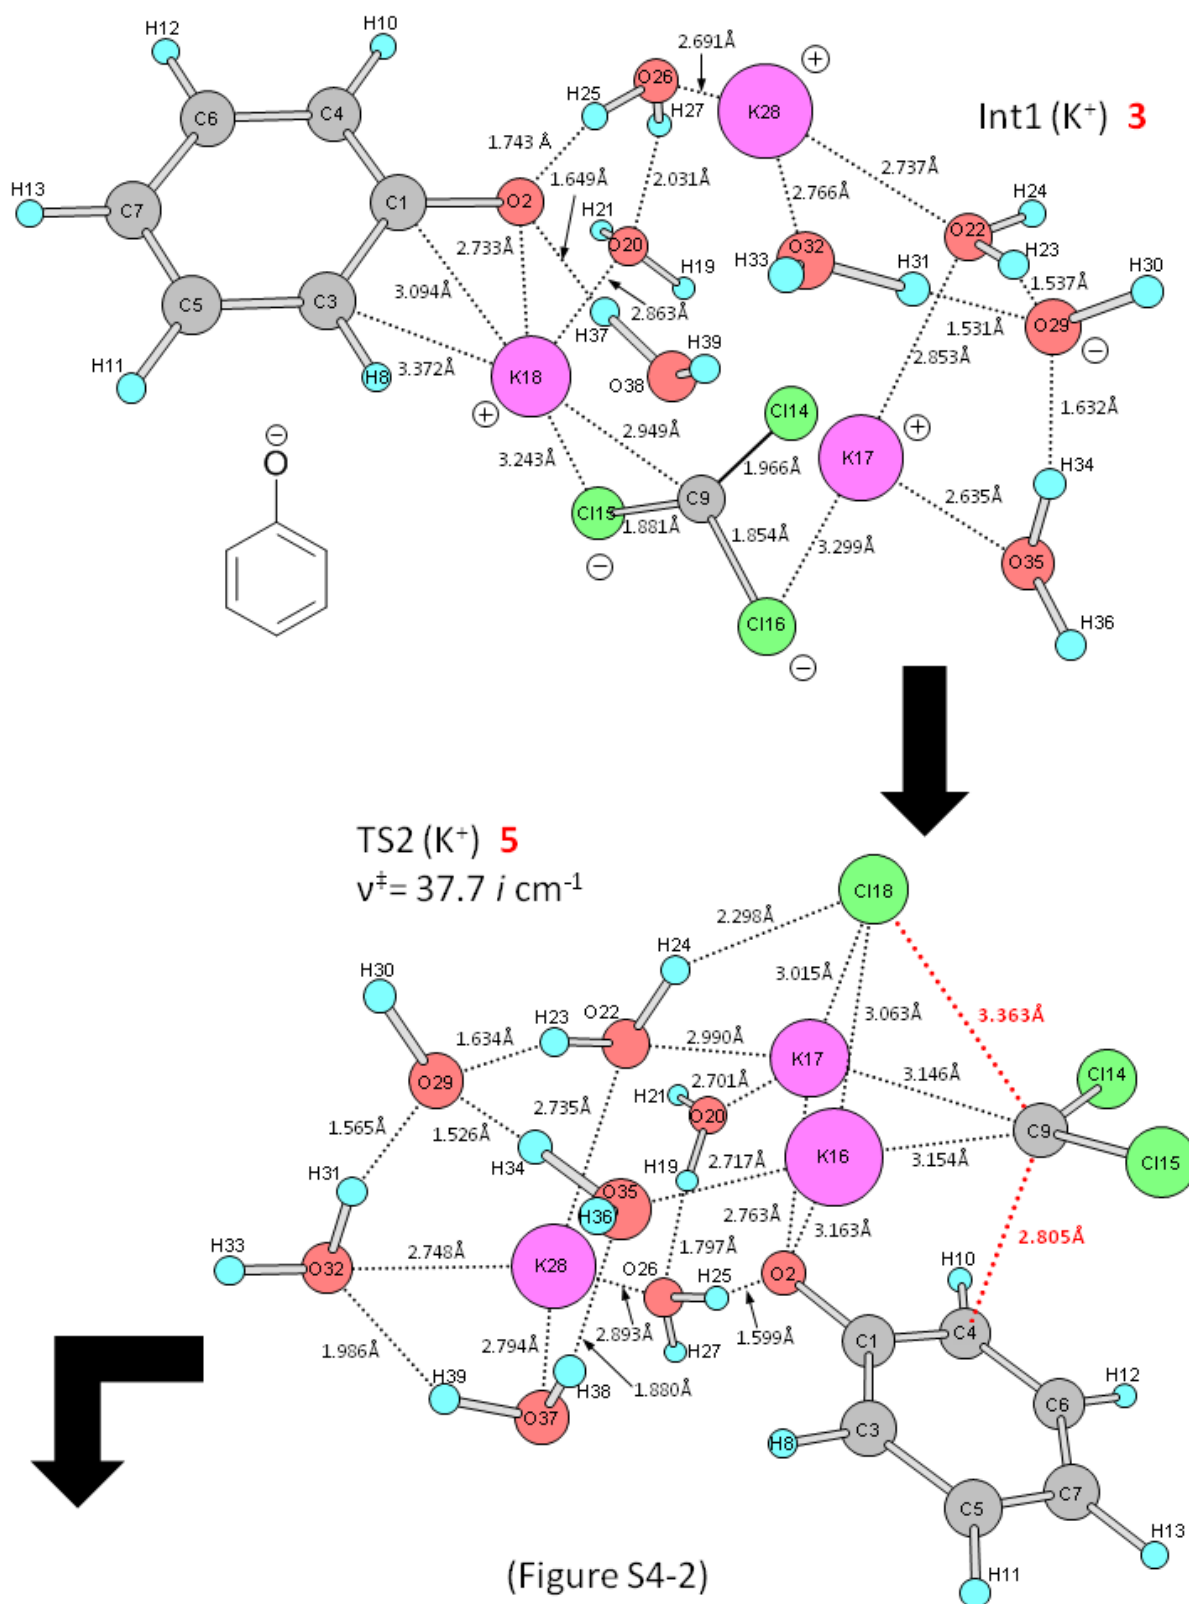



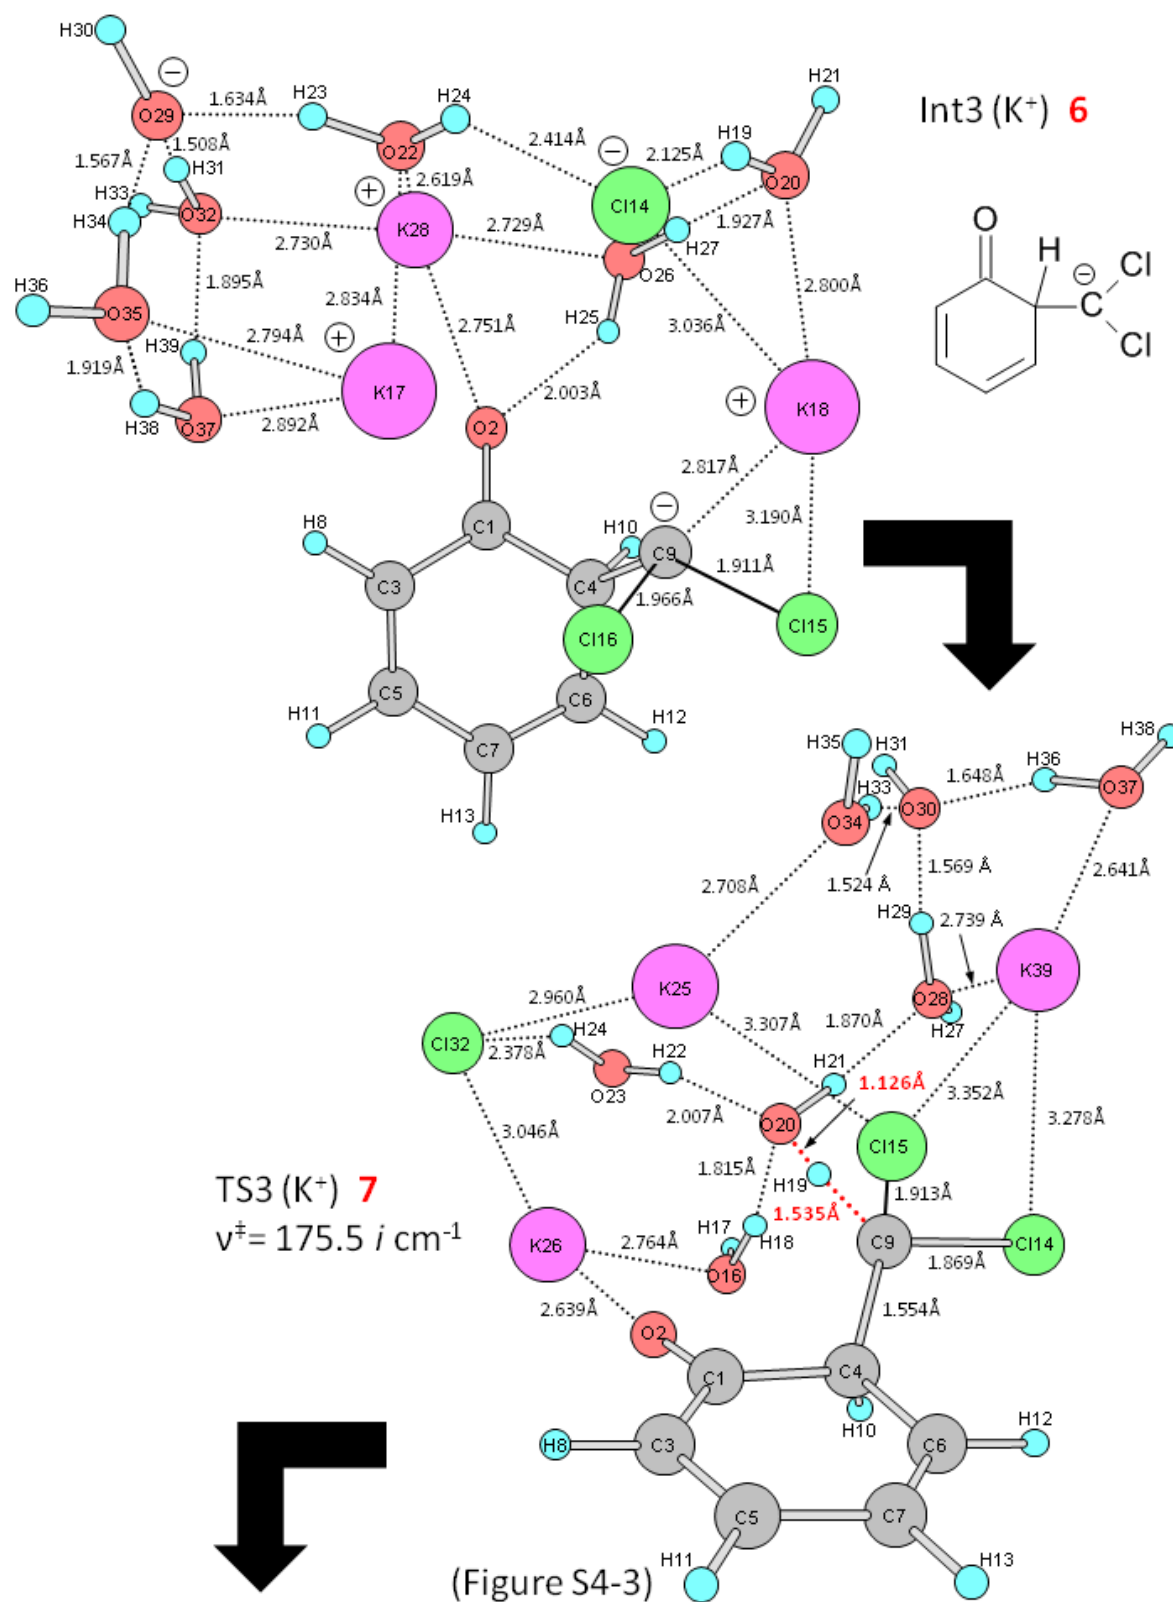

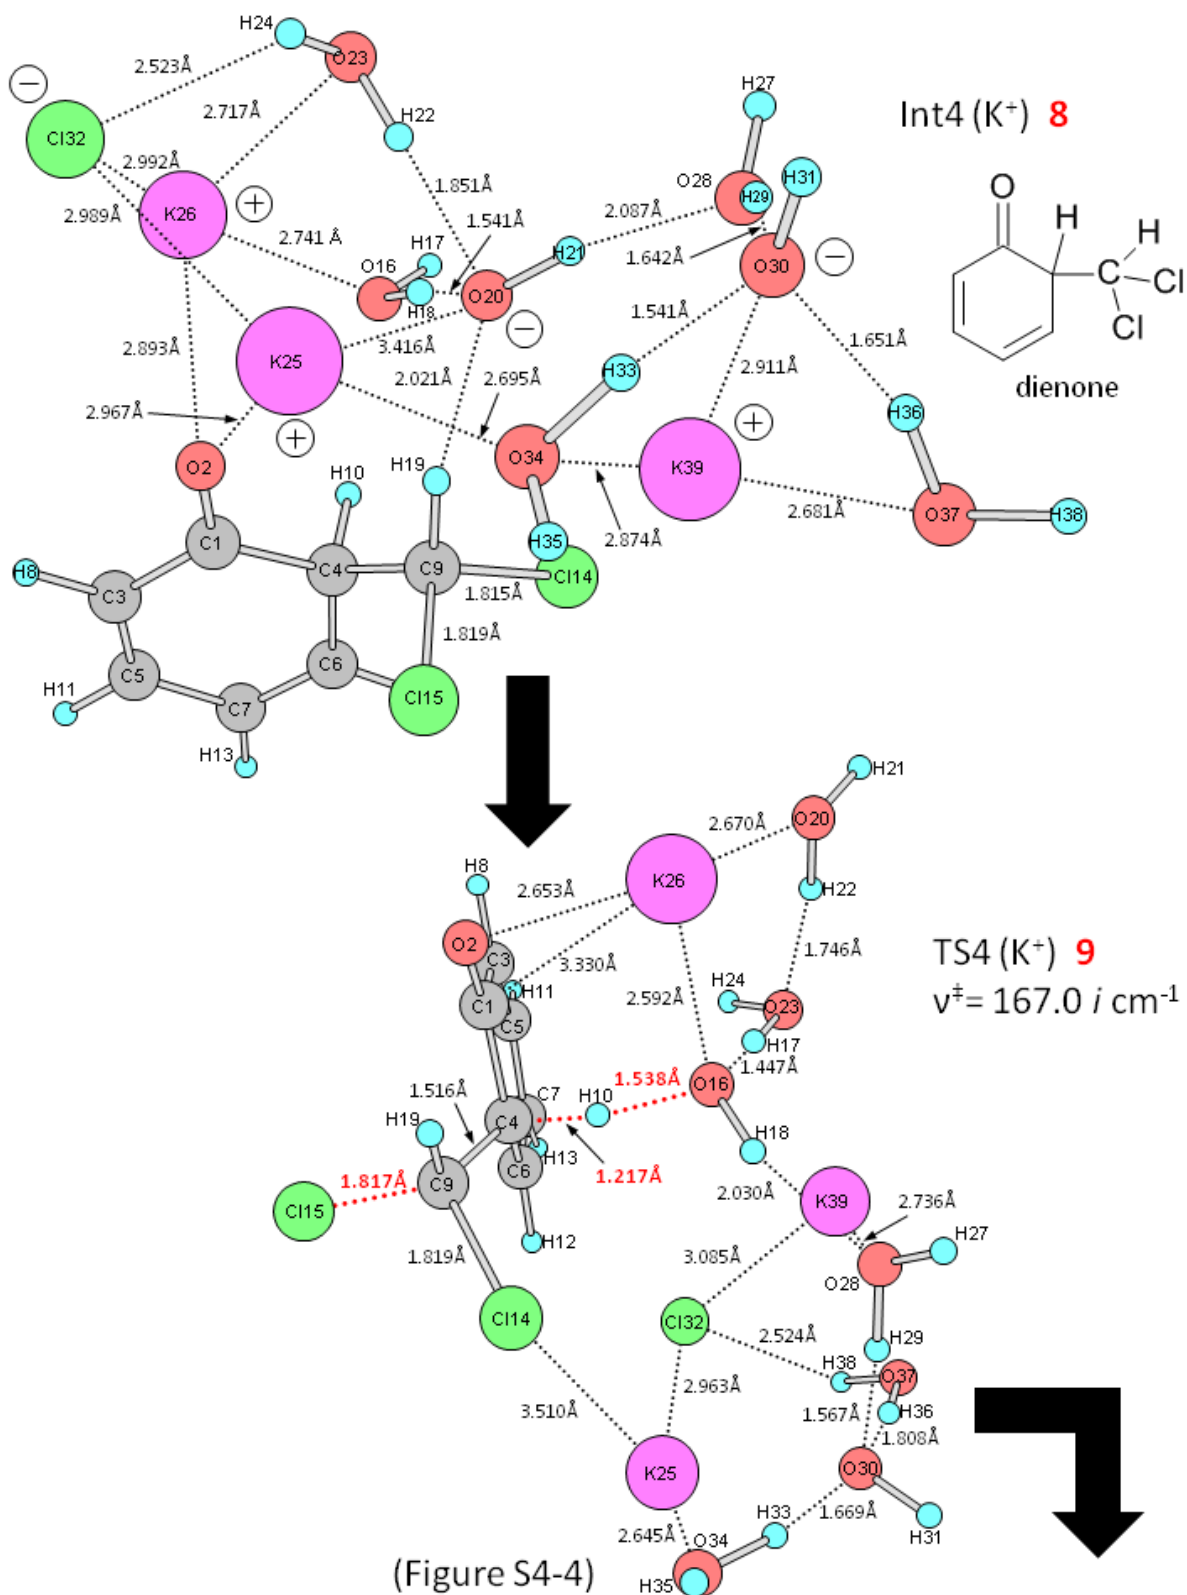

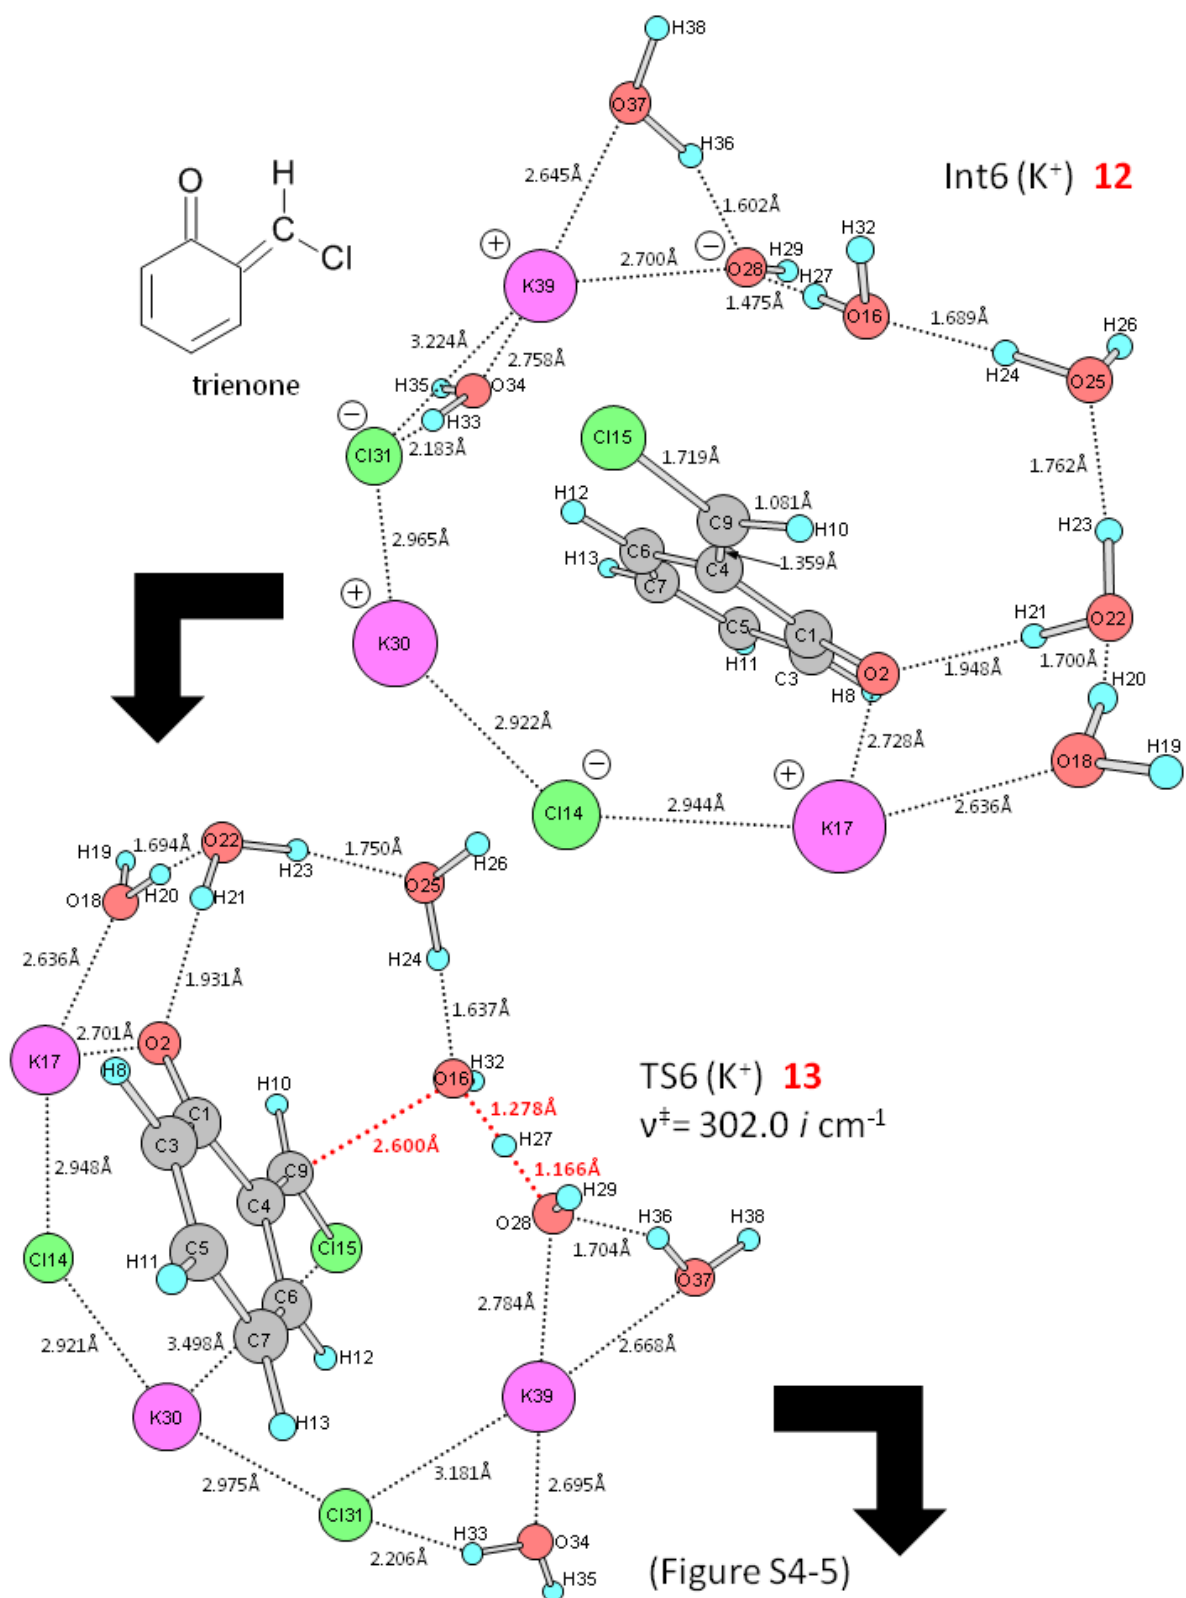

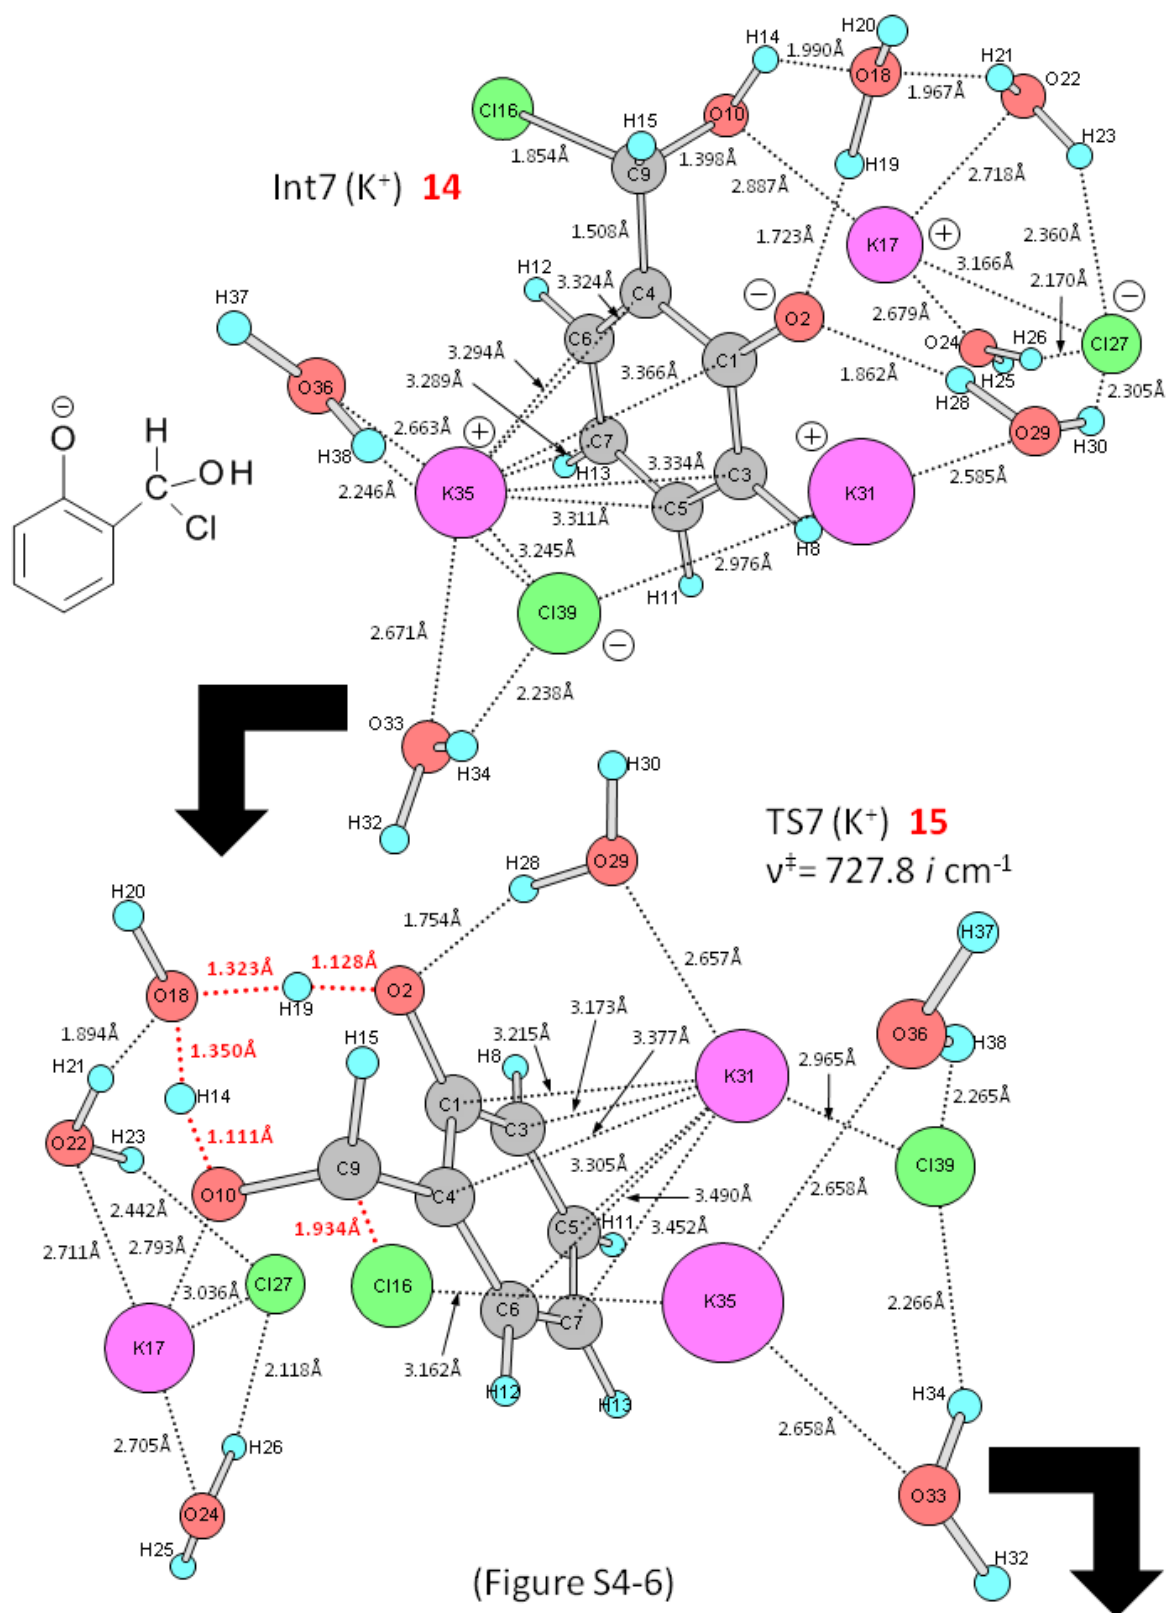

product (K<sup>+</sup>) **16**

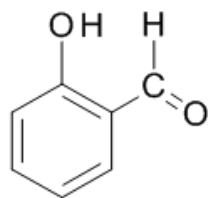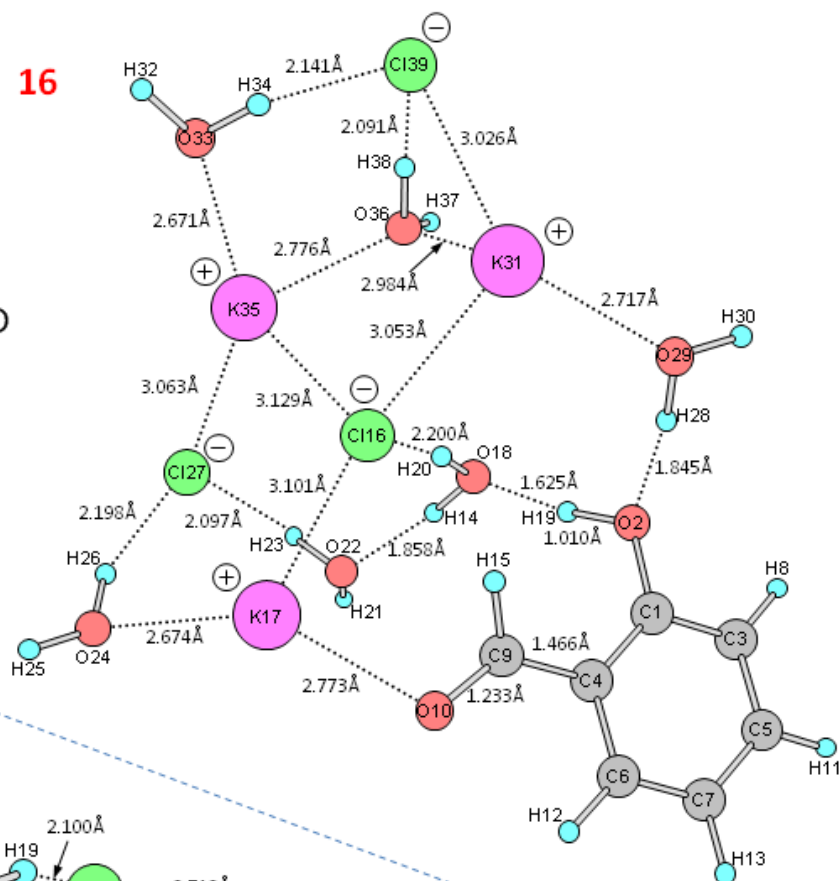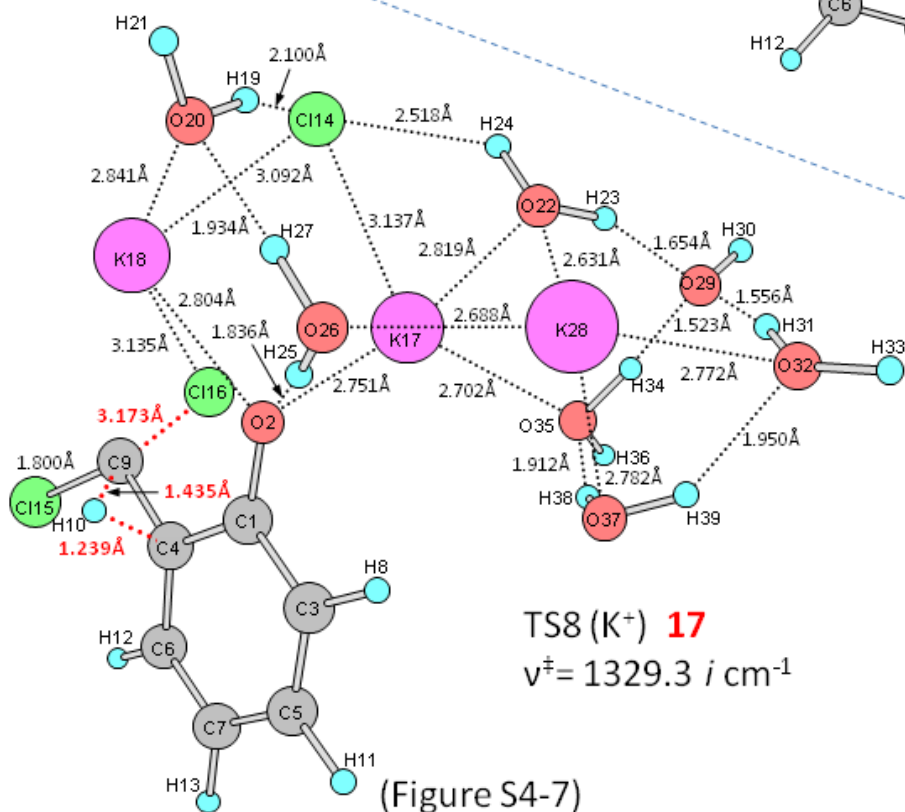

TS8 (K<sup>+</sup>) **17**  
 $\nu^\ddagger = 1329.3 \text{ i cm}^{-1}$

(Figure S4-7)

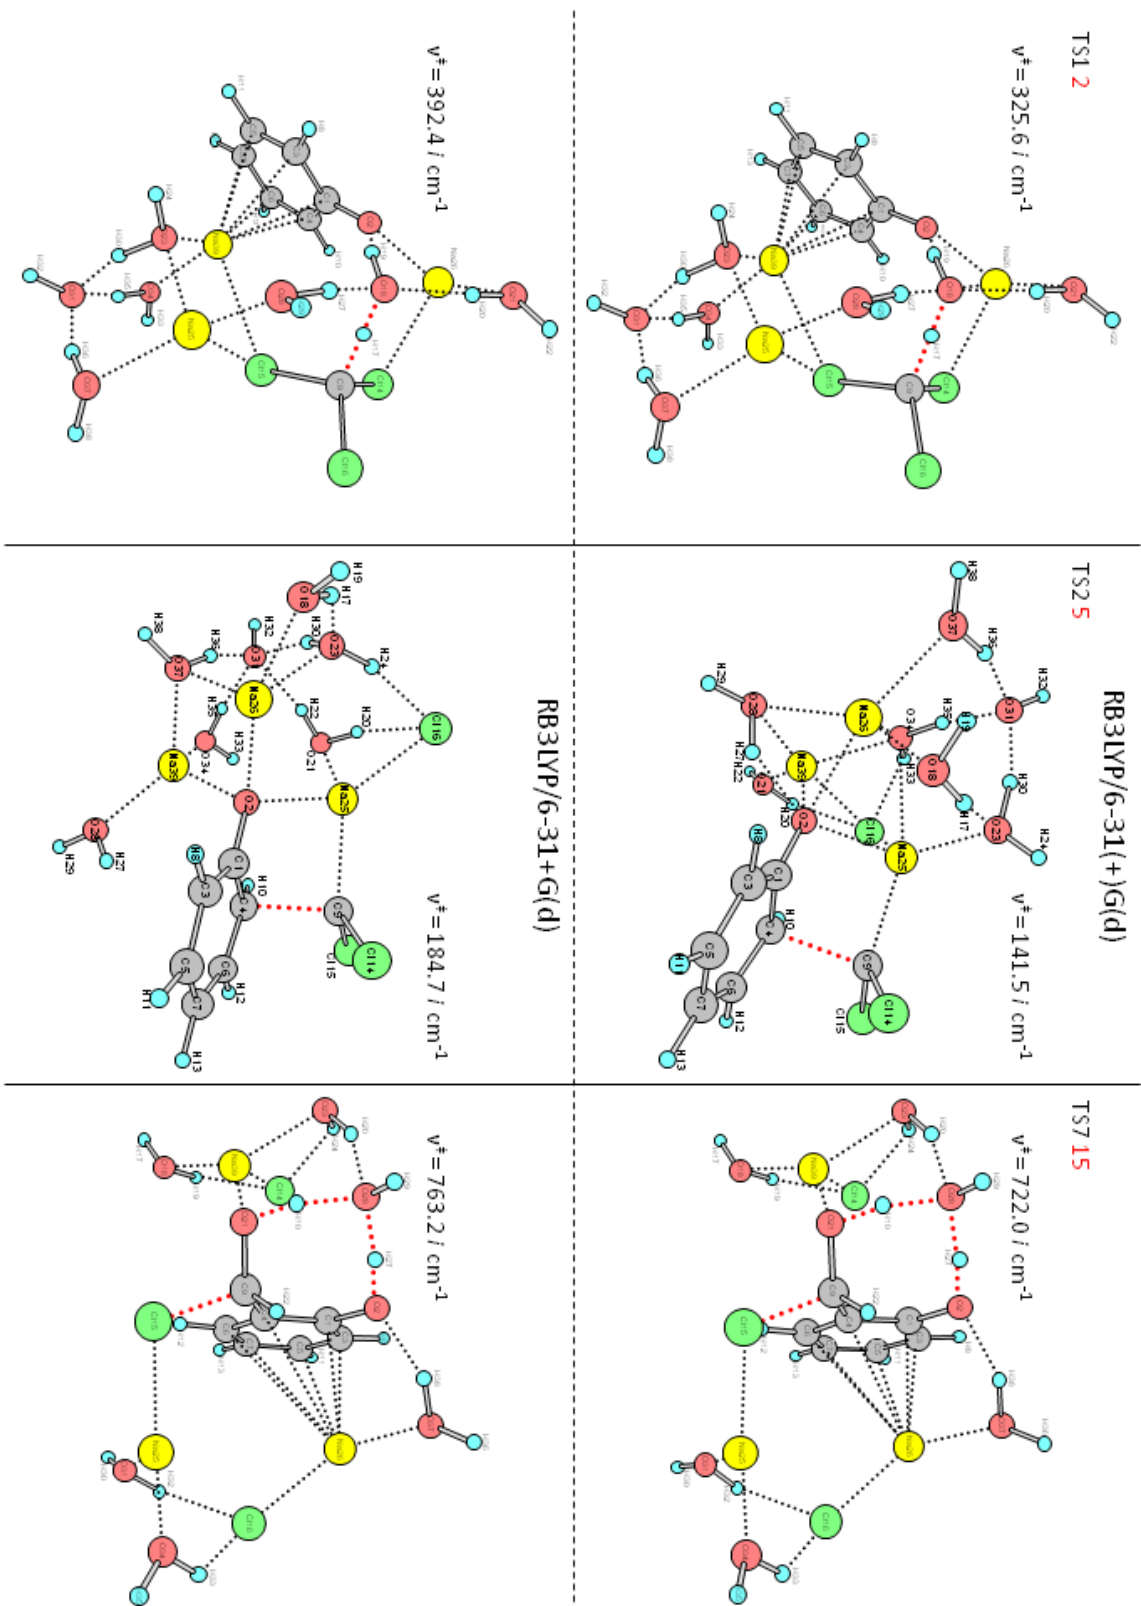

(Figure S5)

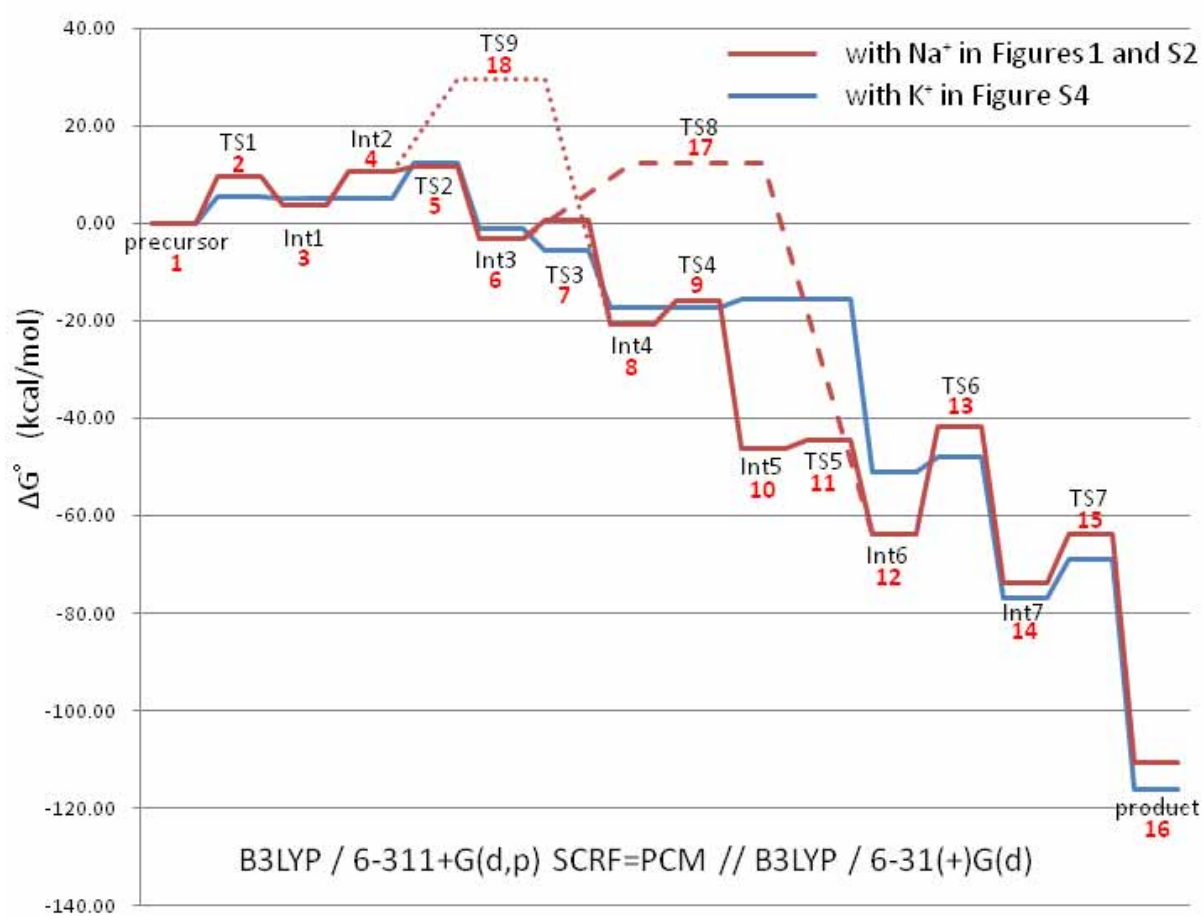

(Figure S6)

|                 | <b>precursor<br/>1</b> | <b>TS1<br/>2</b>   | <b>Int1<br/>3</b>  | <b>Int2<br/>4</b>  | <b>TS2<br/>5</b>   | <b>Int3<br/>6</b>  | <b>TS3<br/>7</b>      | <b>Int4<br/>8</b>  | <b>TS4<br/>9</b>   |
|-----------------|------------------------|--------------------|--------------------|--------------------|--------------------|--------------------|-----------------------|--------------------|--------------------|
| Na <sup>+</sup> | 0.00                   | 9.59<br>[9.43]     | 3.84<br>[4.70]     | 10.61<br>[6.45]    | 11.69<br>[9.29]    | -3.28<br>[-3.63]   | 0.62<br>[0.21]        | -20.82<br>[-22.08] | -16.03<br>[-15.84] |
| K <sup>+</sup>  | 0.00                   | 5.27               | 5.05               |                    | 12.30<br>[11.38]   | -0.94              | -5.57                 | -17.48             | -15.60             |
|                 | <b>Int5<br/>10</b>     | <b>TS5<br/>11</b>  | <b>Int6<br/>12</b> | <b>TS6<br/>13</b>  | <b>Int7<br/>14</b> | <b>TS7<br/>15</b>  | <b>product<br/>16</b> | <b>TS8<br/>17</b>  | <b>TS9<br/>18</b>  |
| Na <sup>+</sup> | -46.15<br>[-46.64]     | -44.60<br>[-45.72] | -63.90<br>[-6230]  | -41.91<br>[-42.22] | -73.76<br>[-74.01] | -63.75<br>[-63.48] | -110.80<br>[-113.83]  | 12.34<br>[12.36]   | 29.58<br>[29.54]   |
| K <sup>+</sup>  |                        |                    | -51.02             | -48.09             | -76.97             | -69.00             | -116.24               |                    |                    |

(Table S1)



=Figure 1=

RB3LYP/6-31(+)-G(d)

precursor in Figure 1

Stoichiometry C7H18CL3NA3O8 %chk=reimer.step0revna.chk

Standard orientation:

| Center<br>Number | Atomic<br>Number | Atomic<br>Type | Coordinates (Angstroms) |           |           |
|------------------|------------------|----------------|-------------------------|-----------|-----------|
|                  |                  |                | X                       | Y         | Z         |
| 1                | 6                | 0              | 3.359715                | -0.967891 | -0.254296 |
| 2                | 17               | 0              | 3.690867                | 0.799156  | 0.024753  |
| 3                | 17               | 0              | 3.191018                | -1.298343 | -1.996059 |
| 4                | 17               | 0              | 4.648053                | -1.955355 | 0.482568  |
| 5                | 11               | 0              | -1.463993               | -1.511812 | 0.349476  |
| 6                | 1                | 0              | 2.414977                | -1.204163 | 0.244185  |
| 7                | 8                | 0              | 0.659181                | 0.511653  | 2.642383  |
| 8                | 1                | 0              | 1.102250                | 0.458610  | 3.500740  |
| 9                | 1                | 0              | -2.813233               | -2.652743 | 3.024731  |
| 10               | 8                | 0              | -2.774559               | -1.998422 | 2.312626  |
| 11               | 1                | 0              | -2.547369               | -1.109271 | 2.730919  |
| 12               | 1                | 0              | -2.277441               | 0.752815  | 1.966952  |
| 13               | 8                | 0              | -2.055881               | 0.466098  | 2.884579  |
| 14               | 1                | 0              | -1.056321               | 0.514701  | 2.915856  |
| 15               | 1                | 0              | -3.902191               | -2.334502 | -0.479237 |
| 16               | 8                | 0              | -4.606635               | -1.851501 | 0.060748  |
| 17               | 1                | 0              | -4.299438               | -1.945249 | 0.982679  |
| 18               | 8                | 0              | -2.484437               | -2.481513 | -1.365499 |
| 19               | 1                | 0              | -2.303138               | -3.369652 | -1.702897 |
| 20               | 1                | 0              | -2.900460               | -1.529609 | -2.521481 |
| 21               | 1                | 0              | 0.717805                | -0.769125 | 1.909380  |
| 22               | 8                | 0              | 0.696431                | -1.573679 | 1.224271  |
| 23               | 1                | 0              | 0.870437                | -2.375491 | 1.740216  |
| 24               | 8                | 0              | -3.288947               | -0.716236 | -3.034389 |
| 25               | 1                | 0              | -3.667780               | -1.044765 | -3.860749 |
| 26               | 11               | 0              | -3.998262               | 0.026432  | -1.044169 |
| 27               | 8                | 0              | -2.252786               | 0.769477  | 0.114318  |
| 28               | 6                | 0              | -1.425035               | 1.724320  | -0.251589 |
| 29               | 6                | 0              | -0.482460               | 1.539187  | -1.306103 |
| 30               | 6                | 0              | 0.425864                | 2.541642  | -1.654673 |
| 31               | 6                | 0              | 0.450620                | 3.767219  | -0.970946 |
| 32               | 6                | 0              | -1.395827               | 2.984864  | 0.415990  |
| 33               | 6                | 0              | -0.482472               | 3.978933  | 0.056601  |
| 34               | 1                | 0              | -0.505256               | 0.601362  | -1.856325 |
| 35               | 1                | 0              | 1.122082                | 2.364123  | -2.471049 |
| 36               | 1                | 0              | 1.147292                | 4.549040  | -1.258519 |
| 37               | 1                | 0              | -2.108126               | 3.157248  | 1.218657  |
| 38               | 1                | 0              | -0.499901               | 4.931143  | 0.583034  |
| 39               | 11               | 0              | 1.067301                | 1.877752  | 1.032809  |

SCF Done: E(RB+HF-LYP) = -2747.15905882 A. U. after 1 cycles  
Zero-point correction= 0.267324 (Hartree/Particle)  
Thermal correction to Energy= 0.300651

Thermal correction to Enthalpy= 0.301595  
Thermal correction to Gibbs Free Energy= 0.197462  
Sum of electronic and zero-point Energies= -2746.891734  
Sum of electronic and thermal Energies= -2746.858408  
Sum of electronic and thermal Enthalpies= -2746.857464  
Sum of electronic and thermal Free Energies= -2746.961597

TS1 in Figure 1

Stoichiometry C7H18CL3NA3O8 %chk=reimer.ts1na.chk  
Standard orientation:

| Center<br>Number | Atomic<br>Number | Atomic<br>Type | Coordinates (Angstroms) |           |           |
|------------------|------------------|----------------|-------------------------|-----------|-----------|
|                  |                  |                | X                       | Y         | Z         |
| 1                | 6                | 0              | 2.004053                | -0.966187 | -0.717165 |
| 2                | 17               | 0              | 2.750667                | 0.177091  | -1.994987 |
| 3                | 17               | 0              | 0.243935                | -1.271636 | -1.271936 |
| 4                | 17               | 0              | 2.878827                | -2.543382 | -0.829214 |
| 5                | 11               | 0              | -0.826878               | -2.430382 | 1.217422  |
| 6                | 1                | 0              | 2.005045                | -0.372185 | 0.633125  |
| 7                | 8                | 0              | 2.004618                | 0.096046  | 1.680233  |
| 8                | 1                | 0              | 1.429362                | 0.896024  | 1.589243  |
| 9                | 8                | 0              | -3.957062               | -2.385759 | -0.127360 |
| 10               | 1                | 0              | -4.885929               | -2.551207 | 0.088669  |
| 11               | 1                | 0              | -3.269293               | -1.482847 | 0.762832  |
| 12               | 1                | 0              | 1.122944                | -2.316313 | 3.514955  |
| 13               | 8                | 0              | 0.629625                | -1.862321 | 2.818067  |
| 14               | 1                | 0              | 1.201512                | -1.092522 | 2.508564  |
| 15               | 1                | 0              | -3.691336               | -1.353300 | -1.333998 |
| 16               | 8                | 0              | -3.347087               | -0.569735 | -1.884162 |
| 17               | 1                | 0              | -3.262238               | -0.872171 | -2.798474 |
| 18               | 8                | 0              | -2.527783               | -0.856847 | 1.213359  |
| 19               | 1                | 0              | -2.858999               | -0.559146 | 2.073080  |
| 20               | 1                | 0              | -2.932268               | -3.585701 | 0.162655  |
| 21               | 1                | 0              | 3.598092                | 0.745034  | 1.867631  |
| 22               | 8                | 0              | 4.345076                | 1.361984  | 1.615658  |
| 23               | 1                | 0              | 5.176692                | 0.882539  | 1.732667  |
| 24               | 8                | 0              | -2.109125               | -4.109208 | 0.456785  |
| 25               | 1                | 0              | -1.965130               | -4.807358 | -0.196577 |
| 26               | 11               | 0              | 2.959553                | 2.144240  | 0.020690  |
| 27               | 1                | 0              | -3.356206               | 3.088434  | 1.919063  |
| 28               | 1                | 0              | -0.993112               | 2.524799  | 2.417357  |
| 29               | 6                | 0              | -2.064005               | 3.389276  | -1.210122 |
| 30               | 6                | 0              | -0.733105               | 3.064409  | -0.937239 |
| 31               | 6                | 0              | -0.292621               | 2.749359  | 0.385854  |
| 32               | 6                | 0              | -2.625398               | 3.078012  | 1.112438  |
| 33               | 6                | 0              | -1.298832               | 2.755132  | 1.399709  |
| 34               | 1                | 0              | -2.352075               | 3.637554  | -2.229772 |
| 35               | 1                | 0              | 0.006217                | 3.065203  | -1.735129 |
| 36               | 8                | 0              | 0.947438                | 2.450511  | 0.651589  |
| 37               | 6                | 0              | -3.030968               | 3.393464  | -0.193807 |
| 38               | 1                | 0              | -4.062990               | 3.652425  | -0.409582 |
| 39               | 11               | 0              | -2.168941               | 0.701354  | -0.452962 |

---

SCF Done: E(RB+HF-LYP) = -2747.13199000 A. U. after 1 cycles  
Zero-point correction= 0.260518 (Hartree/Particle)  
Thermal correction to Energy= 0.294471  
Thermal correction to Enthalpy= 0.295415  
Thermal correction to Gibbs Free Energy= 0.190242  
Sum of electronic and zero-point Energies= -2746.871472  
Sum of electronic and thermal Energies= -2746.837519  
Sum of electronic and thermal Enthalpies= -2746.836575  
Sum of electronic and thermal Free Energies= -2746.941748

Int1 in Figure 1

Stoichiometry C7H18CL3NA3O8 %chk=reimer.k1na.chk

Standard orientation:

---

| Center<br>Number | Atomic<br>Number | Atomic<br>Type | Coordinates (Angstroms) |           |           |
|------------------|------------------|----------------|-------------------------|-----------|-----------|
|                  |                  |                | X                       | Y         | Z         |
| 1                | 6                | 0              | 3.384770                | -0.249064 | -0.123189 |
| 2                | 8                | 0              | 2.098899                | -0.185044 | 0.279307  |
| 3                | 6                | 0              | 3.712405                | -0.656446 | -1.432651 |
| 4                | 6                | 0              | 4.439300                | 0.091292  | 0.747616  |
| 5                | 6                | 0              | 5.041408                | -0.720022 | -1.850732 |
| 6                | 6                | 0              | 5.765073                | 0.023332  | 0.320861  |
| 7                | 6                | 0              | 6.078902                | -0.381539 | -0.979097 |
| 8                | 1                | 0              | 2.905768                | -0.916275 | -2.116580 |
| 9                | 6                | 0              | -1.931077               | -1.918871 | -0.233669 |
| 10               | 1                | 0              | 4.198923                | 0.409571  | 1.759461  |
| 11               | 1                | 0              | 5.266012                | -1.036367 | -2.866986 |
| 12               | 1                | 0              | 6.560675                | 0.291633  | 1.012451  |
| 13               | 1                | 0              | 7.113386                | -0.432263 | -1.306745 |
| 14               | 17               | 0              | -3.042038               | -2.036635 | 1.293169  |
| 15               | 17               | 0              | -1.208514               | -3.661111 | -0.440529 |
| 16               | 17               | 0              | -3.115011               | -1.716230 | -1.662636 |
| 17               | 11               | 0              | -1.852824               | 0.694719  | -1.033025 |
| 18               | 11               | 0              | 0.541760                | -1.688902 | 0.434504  |
| 19               | 1                | 0              | -1.123013               | -1.880727 | 2.584896  |
| 20               | 8                | 0              | -0.154668               | -1.774933 | 2.701005  |
| 21               | 1                | 0              | 0.107687                | -2.432296 | 3.364088  |
| 22               | 8                | 0              | -2.424690               | 1.991374  | 0.791070  |
| 23               | 1                | 0              | -2.630612               | 2.898822  | 0.282904  |
| 24               | 1                | 0              | -3.158763               | 1.807974  | 1.394539  |
| 25               | 1                | 0              | 1.587688                | 0.552761  | 1.729288  |
| 26               | 8                | 0              | 1.000882                | 0.968231  | 2.427576  |
| 27               | 1                | 0              | 0.594869                | 0.212082  | 2.884942  |
| 28               | 11               | 0              | -0.189358               | 2.531751  | 1.289422  |
| 29               | 8                | 0              | -2.504035               | 4.073101  | -0.594388 |
| 30               | 1                | 0              | -3.289577               | 4.636433  | -0.641024 |
| 31               | 1                | 0              | -1.258905               | 4.666932  | 0.239926  |
| 32               | 8                | 0              | -0.450123               | 4.724481  | 0.854381  |
| 33               | 1                | 0              | 0.094962                | 5.463200  | 0.551792  |
| 34               | 1                | 0              | -2.139372               | 3.209071  | -1.885838 |
| 35               | 8                | 0              | -1.832217               | 2.450472  | -2.499448 |

|    |   |   |           |          |           |
|----|---|---|-----------|----------|-----------|
| 36 | 1 | 0 | -2.174318 | 2.639862 | -3.384106 |
| 37 | 1 | 0 | 1.138572  | 0.834051 | -0.486567 |
| 38 | 8 | 0 | 0.325769  | 1.399178 | -0.722292 |
| 39 | 1 | 0 | 0.502022  | 1.892906 | -1.538949 |

---

SCF Done: E(RB+HF-LYP) = -2747.14138951 A. U. after 1 cycles  
Zero-point correction= 0.264199 (Hartree/Particle)  
Thermal correction to Energy= 0.298761  
Thermal correction to Enthalpy= 0.299705  
Thermal correction to Gibbs Free Energy= 0.192263  
Sum of electronic and zero-point Energies= -2746.877190  
Sum of electronic and thermal Energies= -2746.842628  
Sum of electronic and thermal Enthalpies= -2746.841684  
Sum of electronic and thermal Free Energies= -2746.949127

Int2 in Figure 1

Stoichiometry C7H18CL3NA3O8 %chk=reimer.ts2na10.g09.reva.chk

Standard orientation:

---

| Center<br>Number | Atomic<br>Number | Atomic<br>Type | Coordinates (Angstroms) |           |           |
|------------------|------------------|----------------|-------------------------|-----------|-----------|
|                  |                  |                | X                       | Y         | Z         |
| 1                | 6                | 0              | -0.959063               | -0.309018 | 1.462385  |
| 2                | 8                | 0              | 0.289508                | 0.041117  | 1.145092  |
| 3                | 6                | 0              | -1.269431               | -1.618427 | 1.899090  |
| 4                | 6                | 0              | -2.025218               | 0.625305  | 1.361990  |
| 5                | 6                | 0              | -2.569758               | -1.955022 | 2.257149  |
| 6                | 6                | 0              | -3.323247               | 0.278588  | 1.759735  |
| 7                | 6                | 0              | -3.607827               | -1.009481 | 2.199922  |
| 8                | 1                | 0              | -0.474889               | -2.359800 | 1.926929  |
| 9                | 6                | 0              | -2.403603               | -0.026032 | -1.380297 |
| 10               | 1                | 0              | -1.794344               | 1.638722  | 1.042975  |
| 11               | 1                | 0              | -2.783561               | -2.969197 | 2.586744  |
| 12               | 1                | 0              | -4.112602               | 1.023917  | 1.701301  |
| 13               | 1                | 0              | -4.616229               | -1.283310 | 2.495654  |
| 14               | 17               | 0              | -3.182145               | -1.577864 | -1.280511 |
| 15               | 17               | 0              | -3.573472               | 1.212610  | -1.780802 |
| 16               | 17               | 0              | 0.764363                | 2.957321  | -1.331545 |
| 17               | 11               | 0              | 0.110294                | 0.328913  | -1.203426 |
| 18               | 11               | 0              | 1.686896                | 1.958662  | 1.100760  |
| 19               | 8                | 0              | 1.396541                | 4.208098  | 1.425708  |
| 20               | 1                | 0              | 1.110354                | 4.270307  | 0.484532  |
| 21               | 1                | 0              | 1.827477                | 5.045266  | 1.648915  |
| 22               | 8                | 0              | 2.820714                | 0.725548  | -0.595976 |
| 23               | 1                | 0              | 3.255953                | 0.075151  | -1.256788 |
| 24               | 1                | 0              | 2.519682                | 1.486780  | -1.137963 |
| 25               | 1                | 0              | 1.278066                | 0.110465  | 2.512328  |
| 26               | 8                | 0              | 2.220022                | 0.289230  | 2.802796  |
| 27               | 1                | 0              | 2.266882                | 0.245474  | 3.768675  |
| 28               | 11               | 0              | 2.373976                | -1.164765 | 0.857436  |
| 29               | 8                | 0              | 3.547653                | -1.225706 | -2.105553 |
| 30               | 1                | 0              | 4.128396                | -1.123658 | -2.872719 |
| 31               | 1                | 0              | 4.102828                | -2.044026 | -0.873285 |

|    |   |   |          |           |           |
|----|---|---|----------|-----------|-----------|
| 32 | 8 | 0 | 4.165548 | -2.449805 | 0.066034  |
| 33 | 1 | 0 | 5.104077 | -2.557291 | 0.274601  |
| 34 | 1 | 0 | 2.061674 | -1.428580 | -2.386817 |
| 35 | 8 | 0 | 1.026043 | -1.517767 | -2.312406 |
| 36 | 1 | 0 | 0.704231 | -1.868677 | -3.155660 |
| 37 | 8 | 0 | 1.403782 | -3.109055 | -0.011043 |
| 38 | 1 | 0 | 1.106085 | -2.772935 | -0.885724 |
| 39 | 1 | 0 | 2.274798 | -3.513421 | -0.174634 |

---

SCF Done: E(RB3LYP) = -2747.13360683 A. U. after 1 cycles  
Zero-point correction= 0.263791 (Hartree/Particle)  
Thermal correction to Energy= 0.299107  
Thermal correction to Enthalpy= 0.300051  
Thermal correction to Gibbs Free Energy= 0.192964  
Sum of electronic and zero-point Energies= -2746.869816  
Sum of electronic and thermal Energies= -2746.834500  
Sum of electronic and thermal Enthalpies= -2746.833556  
Sum of electronic and thermal Free Energies= -2746.940643

TS2 in Figure 1

Stoichiometry C7H18CL3NA3O8 %chk=reimer.ts2na10.chk

Standard orientation:

---

| Center<br>Number | Atomic<br>Number | Atomic<br>Type | Coordinates (Angstroms) |           |           |
|------------------|------------------|----------------|-------------------------|-----------|-----------|
|                  |                  |                | X                       | Y         | Z         |
| 1                | 6                | 0              | -1.102314               | -0.224604 | 1.359298  |
| 2                | 8                | 0              | 0.146566                | 0.092629  | 1.103087  |
| 3                | 6                | 0              | -1.444654               | -1.407319 | 2.058093  |
| 4                | 6                | 0              | -2.179898               | 0.608623  | 0.886671  |
| 5                | 6                | 0              | -2.766720               | -1.683475 | 2.368515  |
| 6                | 6                | 0              | -3.509305               | 0.351559  | 1.321464  |
| 7                | 6                | 0              | -3.811522               | -0.798241 | 2.018592  |
| 8                | 1                | 0              | -0.651856               | -2.098912 | 2.331107  |
| 9                | 6                | 0              | -2.228736               | -0.067452 | -1.189171 |
| 10               | 1                | 0              | -1.916602               | 1.601130  | 0.532927  |
| 11               | 1                | 0              | -3.003568               | -2.601663 | 2.901046  |
| 12               | 1                | 0              | -4.293745               | 1.043756  | 1.030188  |
| 13               | 1                | 0              | -4.835005               | -1.027024 | 2.298482  |
| 14               | 17               | 0              | -2.869559               | -1.731080 | -1.189194 |
| 15               | 17               | 0              | -3.466574               | 1.019249  | -1.918058 |
| 16               | 17               | 0              | 0.924571                | 2.991252  | -1.370402 |
| 17               | 11               | 0              | 0.240077                | 0.351937  | -1.348184 |
| 18               | 11               | 0              | 1.600470                | 1.979531  | 1.092553  |
| 19               | 8                | 0              | 1.244343                | 4.209216  | 1.456226  |
| 20               | 1                | 0              | 1.050598                | 4.298915  | 0.494329  |
| 21               | 1                | 0              | 1.579253                | 5.063819  | 1.762576  |
| 22               | 8                | 0              | 2.799992                | 0.667435  | -0.507501 |
| 23               | 1                | 0              | 3.296819                | 0.004002  | -1.119251 |
| 24               | 1                | 0              | 2.615693                | 1.456853  | -1.060904 |
| 25               | 1                | 0              | 1.095531                | 0.152245  | 2.570189  |
| 26               | 8                | 0              | 2.032795                | 0.331853  | 2.849580  |
| 27               | 1                | 0              | 2.080023                | 0.322986  | 3.816670  |

|    |    |   |          |           |           |
|----|----|---|----------|-----------|-----------|
| 28 | 11 | 0 | 2.295676 | -1.155697 | 0.960041  |
| 29 | 8  | 0 | 3.675295 | -1.294000 | -1.896259 |
| 30 | 1  | 0 | 4.326695 | -1.197144 | -2.605218 |
| 31 | 1  | 0 | 4.118437 | -2.102036 | -0.612837 |
| 32 | 8  | 0 | 4.103338 | -2.490164 | 0.336285  |
| 33 | 1  | 0 | 5.020939 | -2.633471 | 0.606941  |
| 34 | 1  | 0 | 2.201409 | -1.501477 | -2.315607 |
| 35 | 8  | 0 | 1.167343 | -1.564355 | -2.313802 |
| 36 | 1  | 0 | 0.891319 | -1.949434 | -3.158416 |
| 37 | 8  | 0 | 1.320769 | -3.066853 | 0.074439  |
| 38 | 1  | 0 | 1.080259 | -2.758548 | -0.827666 |
| 39 | 1  | 0 | 2.177274 | -3.518287 | -0.030154 |

-----  
SCF Done: E(RB3LYP) = -2747.13221810 A.U. after 1 cycles  
Zero-point correction= 0.263927 (Hartree/Particle)  
Thermal correction to Energy= 0.298384  
Thermal correction to Enthalpy= 0.299328  
Thermal correction to Gibbs Free Energy= 0.194806  
Sum of electronic and zero-point Energies= -2746.868291  
Sum of electronic and thermal Energies= -2746.833835  
Sum of electronic and thermal Enthalpies= -2746.832890  
Sum of electronic and thermal Free Energies= -2746.937412

Int3 in Figure 1

Stoichiometry C7H18CL3NA3O8 %chk=reimer.ts2naa.g09.fora.chk  
Standard orientation:

-----

| Center<br>Number | Atomic<br>Number | Atomic<br>Type | Coordinates (Angstroms) |           |           |
|------------------|------------------|----------------|-------------------------|-----------|-----------|
|                  |                  |                | X                       | Y         | Z         |
| 1                | 6                | 0              | -1.200951               | -1.145931 | -0.055633 |
| 2                | 8                | 0              | -0.283067               | -0.266710 | -0.072833 |
| 3                | 6                | 0              | -1.119317               | -2.343792 | -0.826215 |
| 4                | 6                | 0              | -2.439740               | -0.884844 | 0.767575  |
| 5                | 6                | 0              | -2.122484               | -3.277898 | -0.766959 |
| 6                | 6                | 0              | -3.411124               | -2.005046 | 0.825731  |
| 7                | 6                | 0              | -3.282286               | -3.116033 | 0.059702  |
| 8                | 1                | 0              | -0.240012               | -2.496696 | -1.445683 |
| 9                | 6                | 0              | -3.075672               | 0.490360  | 0.215026  |
| 10               | 1                | 0              | -2.134044               | -0.588526 | 1.779624  |
| 11               | 1                | 0              | -2.035614               | -4.180801 | -1.367747 |
| 12               | 1                | 0              | -4.284424               | -1.857210 | 1.453409  |
| 13               | 1                | 0              | -4.041977               | -3.891765 | 0.062206  |
| 14               | 17               | 0              | -3.833609               | 0.148905  | -1.467948 |
| 15               | 17               | 0              | -4.452075               | 0.950394  | 1.359873  |
| 16               | 17               | 0              | 0.935183                | 2.813070  | -1.666439 |
| 17               | 11               | 0              | 1.569363                | 0.230843  | -1.368545 |
| 18               | 11               | 0              | -1.267909               | 2.004051  | -0.314475 |
| 19               | 8                | 0              | 0.112107                | 3.275285  | 1.232293  |
| 20               | 1                | 0              | -0.027811               | 4.142832  | 1.641620  |
| 21               | 1                | 0              | 0.636171                | 3.419968  | 0.403197  |
| 22               | 8                | 0              | 3.381567                | 1.115288  | -0.147907 |
| 23               | 1                | 0              | 4.187886                | 0.650882  | -0.570977 |

|    |    |   |          |           |           |
|----|----|---|----------|-----------|-----------|
| 24 | 1  | 0 | 3.292160 | 2.015939  | -0.500437 |
| 25 | 1  | 0 | 0.455425 | 0.313400  | 1.575470  |
| 26 | 8  | 0 | 1.021139 | 0.754727  | 2.245060  |
| 27 | 1  | 0 | 0.802563 | 1.702469  | 2.135954  |
| 28 | 11 | 0 | 3.096893 | -0.062328 | 1.794255  |
| 29 | 8  | 0 | 5.077218 | -0.608025 | -0.957907 |
| 30 | 1  | 0 | 5.845545 | -0.479279 | -1.531742 |
| 31 | 1  | 0 | 5.330377 | -0.944411 | 0.580589  |
| 32 | 8  | 0 | 5.186842 | -1.098859 | 1.583476  |
| 33 | 1  | 0 | 6.059405 | -1.138910 | 1.999686  |
| 34 | 1  | 0 | 3.875765 | -1.267275 | -1.575717 |
| 35 | 8  | 0 | 2.904271 | -1.602424 | -1.793908 |
| 36 | 1  | 0 | 2.973827 | -2.255363 | -2.505375 |
| 37 | 8  | 0 | 2.670455 | -2.215700 | 0.955733  |
| 38 | 1  | 0 | 2.636923 | -2.221423 | -0.026322 |
| 39 | 1  | 0 | 3.589709 | -2.461883 | 1.167980  |

-----  
SCF Done: E(RB3LYP) = -2747.15306464 A. U. after 1 cycles  
Zero-point correction= 0.266558 (Hartree/Particle)  
Thermal correction to Energy= 0.300554  
Thermal correction to Enthalpy= 0.301498  
Thermal correction to Gibbs Free Energy= 0.198465  
Sum of electronic and zero-point Energies= -2746.886507  
Sum of electronic and thermal Energies= -2746.852511  
Sum of electronic and thermal Enthalpies= -2746.851567  
Sum of electronic and thermal Free Energies= -2746.954600

TS3 in Figure 1

Stoichiometry C7H18CL3NA3O8 %chk=reimer.ts3naa3.chk  
Standard orientation:

-----

| Center<br>Number | Atomic<br>Number | Atomic<br>Type | Coordinates (Angstroms) |           |           |
|------------------|------------------|----------------|-------------------------|-----------|-----------|
|                  |                  |                | X                       | Y         | Z         |
| 1                | 6                | 0              | 1.907748                | 1.194062  | 0.696539  |
| 2                | 8                | 0              | 0.744251                | 0.984062  | 1.135033  |
| 3                | 6                | 0              | 2.342795                | 2.487460  | 0.255150  |
| 4                | 6                | 0              | 2.879767                | 0.031841  | 0.627000  |
| 5                | 6                | 0              | 3.652655                | 2.693792  | -0.080380 |
| 6                | 6                | 0              | 4.294868                | 0.402627  | 0.342957  |
| 7                | 6                | 0              | 4.648181                | 1.654650  | -0.023482 |
| 8                | 1                | 0              | 1.617545                | 3.296066  | 0.229460  |
| 9                | 6                | 0              | 2.288330                | -1.052507 | -0.390583 |
| 10               | 1                | 0              | 2.832304                | -0.488144 | 1.593812  |
| 11               | 1                | 0              | 3.962568                | 3.687631  | -0.396084 |
| 12               | 1                | 0              | 5.019648                | -0.405664 | 0.362273  |
| 13               | 1                | 0              | 5.672577                | 1.893605  | -0.292197 |
| 14               | 17               | 0              | 3.195082                | -2.640564 | -0.012333 |
| 15               | 17               | 0              | 2.723900                | -0.552062 | -2.112094 |
| 16               | 8                | 0              | -2.243191               | -0.014718 | 0.480013  |
| 17               | 1                | 0              | -2.802386               | -0.760883 | 0.861164  |
| 18               | 1                | 0              | -1.599643               | -0.514242 | -0.097669 |
| 19               | 1                | 0              | 0.650892                | -1.400533 | -0.682073 |

|    |    |   |           |           |           |
|----|----|---|-----------|-----------|-----------|
| 20 | 8  | 0 | -0.393322 | -1.509758 | -0.695771 |
| 21 | 1  | 0 | -0.695314 | -2.386279 | -1.009595 |
| 22 | 1  | 0 | -2.256497 | 4.733811  | 2.205072  |
| 23 | 8  | 0 | -1.917702 | 4.102794  | 1.554568  |
| 24 | 1  | 0 | -2.425481 | 4.230961  | 0.721024  |
| 25 | 11 | 0 | -3.602483 | 0.652720  | -1.322406 |
| 26 | 11 | 0 | -1.286303 | 2.042123  | 0.783064  |
| 27 | 1  | 0 | -1.357594 | -3.268568 | 3.217742  |
| 28 | 8  | 0 | -1.390090 | -2.446840 | 2.709269  |
| 29 | 1  | 0 | -2.225765 | -2.484801 | 2.125928  |
| 30 | 8  | 0 | -3.420568 | -2.311009 | 1.040297  |
| 31 | 1  | 0 | -4.226667 | -2.522095 | 1.535626  |
| 32 | 17 | 0 | -2.784158 | 3.089976  | -1.227976 |
| 33 | 1  | 0 | -4.095418 | -1.829220 | -0.490628 |
| 34 | 8  | 0 | -4.321480 | -1.488936 | -1.405294 |
| 35 | 1  | 0 | -3.937280 | -2.164490 | -1.988379 |
| 36 | 1  | 0 | -2.677281 | -3.354954 | -0.143242 |
| 37 | 8  | 0 | -2.216134 | -3.656930 | -0.975854 |
| 38 | 1  | 0 | -2.113410 | -4.617425 | -0.913311 |
| 39 | 11 | 0 | 0.029242  | -1.207626 | 1.525763  |

-----  
SCF Done: E(RB3LYP) = -2747.14331184 A.U. after 1 cycles  
Zero-point correction= 0.265886 (Hartree/Particle)  
Thermal correction to Energy= 0.299536  
Thermal correction to Enthalpy= 0.300480  
Thermal correction to Gibbs Free Energy= 0.196745  
Sum of electronic and zero-point Energies= -2746.877426  
Sum of electronic and thermal Energies= -2746.843776  
Sum of electronic and thermal Enthalpies= -2746.842832  
Sum of electronic and thermal Free Energies= -2746.946567

Int4 in Figure 1

Stoichiometry C7H18CL3NA3O8 %chk=reimer.ts3naa3a.rev.chk

Standard orientation:

-----

| Center<br>Number | Atomic<br>Number | Atomic<br>Type | Coordinates (Angstroms) |           |           |
|------------------|------------------|----------------|-------------------------|-----------|-----------|
|                  |                  |                | X                       | Y         | Z         |
| 1                | 6                | 0              | -3.068434               | -1.751443 | -0.292317 |
| 2                | 8                | 0              | -1.943354               | -2.202904 | -0.044398 |
| 3                | 6                | 0              | -3.891057               | -2.285956 | -1.360573 |
| 4                | 6                | 0              | -3.652575               | -0.624911 | 0.580932  |
| 5                | 6                | 0              | -5.122433               | -1.773466 | -1.614926 |
| 6                | 6                | 0              | -5.005339               | -0.121130 | 0.163156  |
| 7                | 6                | 0              | -5.690584               | -0.678433 | -0.850558 |
| 8                | 1                | 0              | -3.468274               | -3.095258 | -1.947320 |
| 9                | 6                | 0              | -2.612550               | 0.491191  | 0.802356  |
| 10               | 1                | 0              | -3.772268               | -1.091542 | 1.574360  |
| 11               | 1                | 0              | -5.711750               | -2.187584 | -2.429862 |
| 12               | 1                | 0              | -5.414983               | 0.708307  | 0.731558  |
| 13               | 1                | 0              | -6.675353               | -0.310935 | -1.122224 |
| 14               | 17               | 0              | -3.124132               | 1.578761  | 2.148842  |
| 15               | 17               | 0              | -2.356991               | 1.445601  | -0.719630 |

-----



|    |    |   |           |           |           |
|----|----|---|-----------|-----------|-----------|
| 16 | 8  | 0 | 2.409680  | -0.016209 | -0.445355 |
| 17 | 1  | 0 | 2.856849  | -0.891066 | -0.656076 |
| 18 | 1  | 0 | 1.806158  | -0.159874 | 0.344201  |
| 19 | 1  | 0 | -1.613873 | 0.118012  | 1.067849  |
| 20 | 8  | 0 | 0.379243  | 0.016341  | 1.225479  |
| 21 | 1  | 0 | 0.565631  | 0.275760  | 2.139969  |
| 22 | 1  | 0 | 0.858165  | 3.267211  | -2.967379 |
| 23 | 8  | 0 | 0.662066  | 3.284917  | -2.019746 |
| 24 | 1  | 0 | 1.434555  | 3.714184  | -1.581508 |
| 25 | 11 | 0 | 4.195000  | 1.367137  | -0.056344 |
| 26 | 11 | 0 | 0.778735  | 1.736918  | -0.269797 |
| 27 | 1  | 0 | 2.301705  | -4.152563 | 1.055835  |
| 28 | 8  | 0 | 1.907717  | -3.504672 | 0.454854  |
| 29 | 1  | 0 | 2.694684  | -3.079017 | -0.054262 |
| 30 | 8  | 0 | 3.803060  | -2.275546 | -0.816608 |
| 31 | 1  | 0 | 3.820489  | -2.601017 | -1.729824 |
| 32 | 17 | 0 | 2.816094  | 3.535215  | 0.183801  |
| 33 | 1  | 0 | 4.988952  | -1.039815 | -0.655389 |
| 34 | 8  | 0 | 5.626746  | -0.315499 | -0.386989 |
| 35 | 1  | 0 | 6.253184  | -0.802616 | 0.176309  |
| 36 | 1  | 0 | 5.138696  | -2.902572 | 0.160449  |
| 37 | 8  | 0 | 5.927876  | -2.997998 | 0.759174  |
| 38 | 1  | 0 | 6.454420  | -3.726856 | 0.400733  |
| 39 | 11 | 0 | 0.195541  | -2.103884 | 0.661745  |

-----  
SCF Done: E(RB3LYP) = -2747.18234110 A. U. after 1 cycles  
Zero-point correction= 0.267919 (Hartree/Particle)  
Thermal correction to Energy= 0.302503  
Thermal correction to Enthalpy= 0.303447  
Thermal correction to Gibbs Free Energy= 0.194607  
Sum of electronic and zero-point Energies= -2746.914422  
Sum of electronic and thermal Energies= -2746.879838  
Sum of electronic and thermal Enthalpies= -2746.878894  
Sum of electronic and thermal Free Energies= -2746.987734

TS4 in Figure 1

Stoichiometry C7H18CL3NA3O8 %chk=reimer.ts4na.chk  
Standard orientation:

-----

| Center<br>Number | Atomic<br>Number | Atomic<br>Type | Coordinates (Angstroms) |           |           |
|------------------|------------------|----------------|-------------------------|-----------|-----------|
|                  |                  |                | X                       | Y         | Z         |
| 1                | 6                | 0              | 2.732906                | 1.152788  | 0.576917  |
| 2                | 8                | 0              | 3.086576                | 1.899684  | -0.370297 |
| 3                | 6                | 0              | 2.719819                | 1.607587  | 1.947434  |
| 4                | 6                | 0              | 2.168582                | -0.215122 | 0.301328  |
| 5                | 6                | 0              | 2.295476                | 0.793064  | 2.957860  |
| 6                | 6                | 0              | 1.847095                | -1.053390 | 1.466392  |
| 7                | 6                | 0              | 1.853152                | -0.554806 | 2.727131  |
| 8                | 1                | 0              | 3.084554                | 2.612567  | 2.137935  |
| 9                | 6                | 0              | 2.860102                | -0.906382 | -0.859390 |
| 10               | 1                | 0              | 1.123701                | 0.165594  | -0.206728 |
| 11               | 1                | 0              | 2.307862                | 1.165664  | 3.979834  |

|    |    |   |           |           |           |
|----|----|---|-----------|-----------|-----------|
| 12 | 1  | 0 | 1.565107  | -2.087057 | 1.286165  |
| 13 | 1  | 0 | 1.559681  | -1.169639 | 3.572256  |
| 14 | 17 | 0 | 1.841597  | -2.232904 | -1.582946 |
| 15 | 17 | 0 | 4.477467  | -1.587514 | -0.399464 |
| 16 | 8  | 0 | 0.100478  | 0.924936  | -1.064857 |
| 17 | 1  | 0 | -0.968865 | 1.805787  | -0.415290 |
| 18 | 1  | 0 | -0.456794 | 0.283485  | -1.540496 |
| 19 | 1  | 0 | 3.049354  | -0.205966 | -1.666487 |
| 20 | 8  | 0 | -0.069595 | 4.350879  | -1.136940 |
| 21 | 1  | 0 | -0.126885 | 5.282731  | -0.885501 |
| 22 | 1  | 0 | -0.801930 | 3.863912  | -0.666413 |
| 23 | 8  | 0 | -1.697512 | 2.485363  | -0.111856 |
| 24 | 1  | 0 | -1.836395 | 2.309247  | 0.840159  |
| 25 | 11 | 0 | -2.599275 | -1.802993 | 1.356001  |
| 26 | 11 | 0 | 1.348281  | 2.657773  | -1.571634 |
| 27 | 1  | 0 | -2.543889 | -0.478948 | -3.051432 |
| 28 | 8  | 0 | -2.404014 | -0.424306 | -2.094909 |
| 29 | 1  | 0 | -2.802750 | -1.274280 | -1.692765 |
| 30 | 8  | 0 | -3.455135 | -2.336436 | -0.682142 |
| 31 | 1  | 0 | -3.920300 | -3.082943 | -1.087312 |
| 32 | 17 | 0 | -3.202154 | 0.582323  | 2.061777  |
| 33 | 1  | 0 | -1.843909 | -3.023643 | -0.367681 |
| 34 | 8  | 0 | -1.090717 | -3.146099 | 0.273597  |
| 35 | 1  | 0 | -0.272558 | -2.945398 | -0.207910 |
| 36 | 1  | 0 | -4.737534 | -1.172882 | -0.625187 |
| 37 | 8  | 0 | -5.299172 | -0.342328 | -0.634380 |
| 38 | 1  | 0 | -5.707459 | -0.297154 | 0.244195  |
| 39 | 11 | 0 | -3.466146 | 1.059816  | -0.614216 |

---

SCF Done: E(RB+HF-LYP) = -2747.17505619 A. U. after 1 cycles  
 Zero-point correction= 0.266153 (Hartree/Particle)  
 Thermal correction to Energy= 0.298979  
 Thermal correction to Enthalpy= 0.299923  
 Thermal correction to Gibbs Free Energy= 0.198045  
 Sum of electronic and zero-point Energies= -2746.908903  
 Sum of electronic and thermal Energies= -2746.876077  
 Sum of electronic and thermal Enthalpies= -2746.875133  
 Sum of electronic and thermal Free Energies= -2746.977011

Int5 in Figure 1

Stoichiometry C7H18CL3NA3O8 %chk=reimer.ts4ana.g09.reva.chk  
 Standard orientation:

---

| Center<br>Number | Atomic<br>Number | Atomic<br>Type | Coordinates (Angstroms) |           |           |
|------------------|------------------|----------------|-------------------------|-----------|-----------|
|                  |                  |                | X                       | Y         | Z         |
| 1                | 6                | 0              | 1.885556                | 1.235873  | 0.762871  |
| 2                | 8                | 0              | 1.679996                | 2.098130  | -0.172836 |
| 3                | 6                | 0              | 1.343190                | 1.384810  | 2.081201  |
| 4                | 6                | 0              | 2.672662                | 0.045742  | 0.536291  |
| 5                | 6                | 0              | 1.564356                | 0.442311  | 3.078467  |
| 6                | 6                | 0              | 2.857904                | -0.903617 | 1.548950  |
| 7                | 6                | 0              | 2.308805                | -0.726607 | 2.820818  |

|    |    |   |           |           |           |
|----|----|---|-----------|-----------|-----------|
| 8  | 1  | 0 | 0.769764  | 2.284726  | 2.288756  |
| 9  | 6  | 0 | 3.272425  | -0.069735 | -0.814554 |
| 10 | 1  | 0 | -0.126573 | 0.549656  | -1.641931 |
| 11 | 1  | 0 | 1.150957  | 0.610410  | 4.071157  |
| 12 | 1  | 0 | 3.463600  | -1.781812 | 1.342824  |
| 13 | 1  | 0 | 2.498155  | -1.450110 | 3.608237  |
| 14 | 17 | 0 | 2.080313  | -0.859828 | -2.060057 |
| 15 | 17 | 0 | 4.816669  | -0.977966 | -0.895974 |
| 16 | 8  | 0 | -0.910683 | 1.121423  | -1.726573 |
| 17 | 1  | 0 | -1.963126 | 1.566316  | -0.364884 |
| 18 | 1  | 0 | -1.678254 | 0.500694  | -2.086141 |
| 19 | 1  | 0 | 3.432213  | 0.907399  | -1.259702 |
| 20 | 8  | 0 | -1.630772 | 4.339572  | -0.465309 |
| 21 | 1  | 0 | -1.891283 | 5.190503  | -0.086767 |
| 22 | 1  | 0 | -2.221498 | 3.643961  | -0.080012 |
| 23 | 8  | 0 | -2.691051 | 1.933896  | 0.199637  |
| 24 | 1  | 0 | -2.560657 | 1.521357  | 1.084314  |
| 25 | 11 | 0 | -0.201251 | -1.110041 | 1.678059  |
| 26 | 11 | 0 | 0.102826  | 3.100543  | -1.223073 |
| 27 | 1  | 0 | -3.245141 | -0.271933 | -3.151581 |
| 28 | 8  | 0 | -2.858901 | -0.398480 | -2.273173 |
| 29 | 1  | 0 | -2.565973 | -1.867761 | -2.001036 |
| 30 | 8  | 0 | -2.399981 | -2.813741 | -1.592726 |
| 31 | 1  | 0 | -2.405812 | -3.457441 | -2.316590 |
| 32 | 17 | 0 | -2.656986 | -0.442489 | 2.206415  |
| 33 | 1  | 0 | -0.927289 | -2.685298 | -0.627965 |
| 34 | 8  | 0 | -0.124317 | -2.488573 | -0.080933 |
| 35 | 1  | 0 | 0.599314  | -2.342402 | -0.713376 |
| 36 | 1  | 0 | -3.850560 | -2.743909 | -0.413602 |
| 37 | 8  | 0 | -4.528334 | -2.303751 | 0.148475  |
| 38 | 1  | 0 | -4.175582 | -2.340659 | 1.055188  |
| 39 | 11 | 0 | -3.910595 | -0.120442 | -0.304092 |

-----  
SCF Done: E(RB3LYP) = -2747.23020867 A. U. after 1 cycles  
Zero-point correction= 0.269691 (Hartree/Particle)  
Thermal correction to Energy= 0.303230  
Thermal correction to Enthalpy= 0.304174  
Thermal correction to Gibbs Free Energy= 0.202094  
Sum of electronic and zero-point Energies= -2746.960518  
Sum of electronic and thermal Energies= -2746.926979  
Sum of electronic and thermal Enthalpies= -2746.926035  
Sum of electronic and thermal Free Energies= -2747.028114

TS5 in Figure 1

Stoichiometry C7H18CL3NA3O8 %chk=reimer.ts4ana.chk

Standard orientation:

-----

| Center<br>Number | Atomic<br>Number | Atomic<br>Type | Coordinates (Angstroms) |          |          |
|------------------|------------------|----------------|-------------------------|----------|----------|
|                  |                  |                | X                       | Y        | Z        |
| 1                | 6                | 0              | 2.101702                | 1.184084 | 0.953911 |
| 2                | 8                | 0              | 2.008966                | 2.146285 | 0.135726 |
| 3                | 6                | 0              | 1.468936                | 1.225329 | 2.252483 |

-----

|    |    |   |           |           |           |
|----|----|---|-----------|-----------|-----------|
| 4  | 6  | 0 | 2.828352  | -0.049682 | 0.630502  |
| 5  | 6  | 0 | 1.525726  | 0.159390  | 3.117477  |
| 6  | 6  | 0 | 2.841650  | -1.138869 | 1.552112  |
| 7  | 6  | 0 | 2.208585  | -1.047560 | 2.770813  |
| 8  | 1  | 0 | 0.938563  | 2.135713  | 2.515350  |
| 9  | 6  | 0 | 3.458033  | -0.082925 | -0.620885 |
| 10 | 1  | 0 | -0.289297 | 0.472404  | -1.833998 |
| 11 | 1  | 0 | 1.029482  | 0.226974  | 4.082581  |
| 12 | 1  | 0 | 3.377482  | -2.043269 | 1.280366  |
| 13 | 1  | 0 | 2.254699  | -1.867797 | 3.481153  |
| 14 | 17 | 0 | 1.685855  | -0.447452 | -2.303426 |
| 15 | 17 | 0 | 4.581899  | -1.320991 | -1.050170 |
| 16 | 8  | 0 | -0.997737 | 1.129250  | -1.652974 |
| 17 | 1  | 0 | -1.842177 | 1.622007  | -0.191661 |
| 18 | 1  | 0 | -1.884016 | 0.682265  | -1.982599 |
| 19 | 1  | 0 | 3.597544  | 0.837191  | -1.167736 |
| 20 | 8  | 0 | -1.067118 | 4.269803  | -0.349751 |
| 21 | 1  | 0 | -1.069341 | 5.107899  | 0.133190  |
| 22 | 1  | 0 | -1.722273 | 3.674951  | 0.091956  |
| 23 | 8  | 0 | -2.456009 | 2.049733  | 0.459740  |
| 24 | 1  | 0 | -2.278784 | 1.590331  | 1.309922  |
| 25 | 11 | 0 | -0.216782 | -1.344446 | 1.279699  |
| 26 | 11 | 0 | 0.443951  | 2.814668  | -1.256254 |
| 27 | 1  | 0 | -3.644175 | 0.205557  | -2.941782 |
| 28 | 8  | 0 | -3.199939 | -0.041452 | -2.118479 |
| 29 | 1  | 0 | -2.947400 | -1.538416 | -2.032251 |
| 30 | 8  | 0 | -2.771802 | -2.526060 | -1.741047 |
| 31 | 1  | 0 | -2.929937 | -3.092928 | -2.510591 |
| 32 | 17 | 0 | -2.420523 | -0.483777 | 2.303888  |
| 33 | 1  | 0 | -1.111670 | -2.568913 | -1.084505 |
| 34 | 8  | 0 | -0.237698 | -2.460570 | -0.631842 |
| 35 | 1  | 0 | 0.371720  | -2.081372 | -1.298602 |
| 36 | 1  | 0 | -4.050742 | -2.461329 | -0.379910 |
| 37 | 8  | 0 | -4.618217 | -2.039326 | 0.306065  |
| 38 | 1  | 0 | -4.161765 | -2.191005 | 1.152024  |
| 39 | 11 | 0 | -3.947379 | 0.153194  | -0.021250 |

---

SCF Done: E(RB+HF-LYP) = -2747.22445158 A.U. after 1 cycles  
Zero-point correction= 0.269197 (Hartree/Particle)  
Thermal correction to Energy= 0.302317  
Thermal correction to Enthalpy= 0.303261  
Thermal correction to Gibbs Free Energy= 0.201153  
Sum of electronic and zero-point Energies= -2746.955255  
Sum of electronic and thermal Energies= -2746.922135  
Sum of electronic and thermal Enthalpies= -2746.921190  
Sum of electronic and thermal Free Energies= -2747.023298

Int6 in Figure 1

Stoichiometry C7H18CL3NA3O8 %chk=reimer.ts4ana.g09.fora.chk

Standard orientation:

---

| Center<br>Number | Atomic<br>Number | Atomic<br>Type | Coordinates (Angstroms) |   |   |
|------------------|------------------|----------------|-------------------------|---|---|
|                  |                  |                | X                       | Y | Z |

---

|    |    |   |           |           |           |
|----|----|---|-----------|-----------|-----------|
| 1  | 6  | 0 | 4.099240  | -1.074948 | 0.285165  |
| 2  | 8  | 0 | 2.892348  | -1.336994 | 0.120417  |
| 3  | 6  | 0 | 5.052403  | -2.110877 | 0.646950  |
| 4  | 6  | 0 | 4.652253  | 0.309392  | 0.123877  |
| 5  | 6  | 0 | 6.371278  | -1.828030 | 0.818424  |
| 6  | 6  | 0 | 6.071010  | 0.529638  | 0.322039  |
| 7  | 6  | 0 | 6.895980  | -0.493559 | 0.654678  |
| 8  | 1  | 0 | 4.656730  | -3.114140 | 0.769606  |
| 9  | 6  | 0 | 3.770640  | 1.293715  | -0.201721 |
| 10 | 1  | 0 | -1.023974 | -0.068618 | 0.826521  |
| 11 | 1  | 0 | 7.059960  | -2.625590 | 1.087101  |
| 12 | 1  | 0 | 6.455380  | 1.536485  | 0.198162  |
| 13 | 1  | 0 | 7.957407  | -0.321206 | 0.802227  |
| 14 | 17 | 0 | 0.185188  | 1.258914  | -0.741461 |
| 15 | 17 | 0 | 4.204305  | 2.942844  | -0.430243 |
| 16 | 8  | 0 | -1.202310 | -1.014565 | 1.001768  |
| 17 | 1  | 0 | -2.122715 | -1.769147 | -0.285346 |
| 18 | 1  | 0 | -2.027006 | -1.044337 | 1.624344  |
| 19 | 1  | 0 | 2.706294  | 1.117261  | -0.343357 |
| 20 | 8  | 0 | -0.132612 | -3.081827 | -1.588432 |
| 21 | 1  | 0 | 0.094777  | -3.577733 | -2.387002 |
| 22 | 1  | 0 | -1.118854 | -3.009036 | -1.554083 |
| 23 | 8  | 0 | -2.660776 | -2.266524 | -0.958261 |
| 24 | 1  | 0 | -2.950890 | -1.580051 | -1.601840 |
| 25 | 11 | 0 | -2.340675 | 1.853192  | -1.121259 |
| 26 | 11 | 0 | 0.708638  | -1.385513 | -0.301416 |
| 27 | 1  | 0 | -3.494385 | -1.619186 | 3.008063  |
| 28 | 8  | 0 | -3.466356 | -1.069863 | 2.211732  |
| 29 | 1  | 0 | -4.043044 | 0.274656  | 2.460919  |
| 30 | 8  | 0 | -4.498091 | 1.227076  | 2.421058  |
| 31 | 1  | 0 | -4.743280 | 1.481717  | 3.322794  |
| 32 | 17 | 0 | -4.216350 | 0.265551  | -1.952491 |
| 33 | 1  | 0 | -3.460121 | 2.282260  | 1.499058  |
| 34 | 8  | 0 | -2.833368 | 2.762816  | 0.895606  |
| 35 | 1  | 0 | -2.061845 | 2.989485  | 1.435884  |
| 36 | 1  | 0 | -5.872370 | 0.662254  | 1.286340  |
| 37 | 8  | 0 | -6.318147 | 0.101896  | 0.610368  |
| 38 | 1  | 0 | -6.185914 | 0.567853  | -0.235139 |
| 39 | 11 | 0 | -4.594500 | -1.418159 | 0.294179  |

---

SCF Done: E(RB3LYP) = -2747.24980984 A.U. after 1 cycles  
Zero-point correction= 0.268592 (Hartree/Particle)  
Thermal correction to Energy= 0.303391  
Thermal correction to Enthalpy= 0.304335  
Thermal correction to Gibbs Free Energy= 0.195735  
Sum of electronic and zero-point Energies= -2746.981218  
Sum of electronic and thermal Energies= -2746.946419  
Sum of electronic and thermal Enthalpies= -2746.945475  
Sum of electronic and thermal Free Energies= -2747.054075

TS6 in Figure 1

Stoichiometry C7H18CL3NA308 %chk= reimer.ts5na.chk

Standard orientation:

| Center<br>Number | Atomic<br>Number | Atomic<br>Type | Coordinates (Angstroms) |           |           |
|------------------|------------------|----------------|-------------------------|-----------|-----------|
|                  |                  |                | X                       | Y         | Z         |
| 1                | 6                | 0              | -2.080221               | 0.058382  | 1.486199  |
| 2                | 8                | 0              | -3.107409               | -0.014335 | 0.755846  |
| 3                | 6                | 0              | -2.174557               | 0.075395  | 2.925788  |
| 4                | 6                | 0              | -0.715017               | 0.040194  | 0.905954  |
| 5                | 6                | 0              | -1.065754               | -0.122377 | 3.698398  |
| 6                | 6                | 0              | 0.407489                | -0.219162 | 1.773176  |
| 7                | 6                | 0              | 0.237740                | -0.301956 | 3.123255  |
| 8                | 1                | 0              | -3.166564               | 0.169487  | 3.356077  |
| 9                | 6                | 0              | -0.614505               | 0.318408  | -0.433550 |
| 10               | 1                | 0              | -1.471758               | 0.624992  | -1.016968 |
| 11               | 1                | 0              | -1.168103               | -0.164603 | 4.780192  |
| 12               | 1                | 0              | 1.398122                | -0.315396 | 1.342936  |
| 13               | 1                | 0              | 1.089429                | -0.480939 | 3.771989  |
| 14               | 17               | 0              | -1.329071               | -3.442952 | -0.640262 |
| 15               | 17               | 0              | 0.762068                | -0.053746 | -1.413851 |
| 16               | 8                | 0              | -0.067145               | 2.744092  | -0.560028 |
| 17               | 11               | 0              | -3.158717               | -1.630824 | -0.881415 |
| 18               | 8                | 0              | -3.850691               | -0.134194 | -2.391239 |
| 19               | 1                | 0              | -4.161886               | -0.082166 | -3.305478 |
| 20               | 1                | 0              | -4.105939               | 0.727125  | -1.940464 |
| 21               | 1                | 0              | -4.208496               | 1.427830  | -0.025291 |
| 22               | 8                | 0              | -4.431098               | 1.939966  | -0.826122 |
| 23               | 1                | 0              | -3.789762               | 2.695348  | -0.807331 |
| 24               | 1                | 0              | -1.547159               | 3.472048  | -0.481129 |
| 25               | 8                | 0              | -2.478419               | 3.845991  | -0.579531 |
| 26               | 1                | 0              | -2.545266               | 4.604773  | 0.016824  |
| 27               | 1                | 0              | 1.045887                | 2.614547  | 0.088929  |
| 28               | 8                | 0              | 2.045720                | 2.428068  | 0.633219  |
| 29               | 1                | 0              | 1.869803                | 2.587317  | 1.572453  |
| 30               | 11               | 0              | 1.094833                | -2.848232 | -0.083479 |
| 31               | 17               | 0              | 3.459675                | -1.916071 | 0.436507  |
| 32               | 1                | 0              | 0.183945                | 2.957731  | -1.473810 |
| 33               | 1                | 0              | 4.090880                | -1.185584 | -1.612636 |
| 34               | 8                | 0              | 4.078034                | -0.351221 | -2.133275 |
| 35               | 1                | 0              | 4.817437                | -0.387835 | -2.757125 |
| 36               | 1                | 0              | 3.585865                | 3.154735  | 0.156024  |
| 37               | 8                | 0              | 4.509335                | 2.921921  | -0.127036 |
| 38               | 1                | 0              | 4.904940                | 3.691034  | -0.558809 |
| 39               | 11               | 0              | 3.558932                | 0.821878  | -0.185749 |

SCF Done: E(RB+HF-LYP) = -2747.19829643 A. U. after 1 cycles  
Zero-point correction= 0.262710 (Hartree/Particle)  
Thermal correction to Energy= 0.298428  
Thermal correction to Enthalpy= 0.299372  
Thermal correction to Gibbs Free Energy= 0.190222  
Sum of electronic and zero-point Energies= -2746.935587  
Sum of electronic and thermal Energies= -2746.899868  
Sum of electronic and thermal Enthalpies= -2746.898924

Sum of electronic and thermal Free Energies= -2747.008075

Int7 in Figure 1

Stoichiometry C7H18CL3NA3O8 %chk=reimer.step5revna.chk

Standard orientation:

| Center<br>Number | Atomic<br>Number | Atomic<br>Type | Coordinates (Angstroms) |           |           |
|------------------|------------------|----------------|-------------------------|-----------|-----------|
|                  |                  |                | X                       | Y         | Z         |
| 1                | 6                | 0              | -0.487433               | -0.205574 | 1.090021  |
| 2                | 8                | 0              | 0.486788                | 0.480961  | 0.519709  |
| 3                | 6                | 0              | -1.176283               | 0.292444  | 2.226826  |
| 4                | 6                | 0              | -0.892149               | -1.484306 | 0.581874  |
| 5                | 6                | 0              | -2.176781               | -0.449639 | 2.854732  |
| 6                | 6                | 0              | -1.886230               | -2.216260 | 1.239727  |
| 7                | 6                | 0              | -2.534268               | -1.712959 | 2.370397  |
| 8                | 1                | 0              | -0.883551               | 1.266726  | 2.609927  |
| 9                | 6                | 0              | -0.189825               | -1.927098 | -0.682774 |
| 10               | 8                | 0              | 1.122334                | -2.293036 | -0.465076 |
| 11               | 1                | 0              | -2.673405               | -0.041315 | 3.731718  |
| 12               | 1                | 0              | -2.163359               | -3.190870 | 0.852201  |
| 13               | 1                | 0              | -3.300313               | -2.300833 | 2.866171  |
| 14               | 1                | 0              | 1.658167                | -2.038980 | -1.274266 |
| 15               | 1                | 0              | -0.249992               | -1.157975 | -1.452895 |
| 16               | 17               | 0              | -1.127073               | -3.331167 | -1.540205 |
| 17               | 11               | 0              | 2.354108                | -0.739190 | 0.901062  |
| 18               | 8                | 0              | 0.716525                | 1.112808  | -2.096799 |
| 19               | 1                | 0              | 0.517223                | 0.715708  | -1.209385 |
| 20               | 1                | 0              | -0.115718               | 1.529323  | -2.385244 |
| 21               | 8                | 0              | 2.536227                | -1.042567 | -2.382522 |
| 22               | 1                | 0              | 1.978752                | -0.266589 | -2.604552 |
| 23               | 1                | 0              | 3.322339                | -0.652148 | -1.942175 |
| 24               | 8                | 0              | 4.049940                | -1.142578 | 2.404752  |
| 25               | 1                | 0              | 4.562700                | -1.869235 | 2.786682  |
| 26               | 1                | 0              | 4.648193                | -0.653910 | 1.795929  |
| 27               | 17               | 0              | 4.437891                | 0.510753  | -0.201665 |
| 28               | 1                | 0              | 3.470597                | 2.389922  | 0.127834  |
| 29               | 8                | 0              | 2.896874                | 3.186303  | 0.285073  |
| 30               | 1                | 0              | 3.485198                | 3.950714  | 0.207524  |
| 31               | 11               | 0              | 0.745667                | 2.671746  | -0.092887 |
| 32               | 1                | 0              | -5.373163               | 2.771756  | 0.585585  |
| 33               | 8                | 0              | -4.515698               | 2.350392  | 0.432965  |
| 34               | 1                | 0              | -3.919039               | 3.017741  | 0.029502  |
| 35               | 11               | 0              | -3.002780               | 0.691456  | 0.052377  |
| 36               | 8                | 0              | -3.436609               | -0.862650 | -1.589221 |
| 37               | 1                | 0              | -2.952545               | -1.708270 | -1.662841 |
| 38               | 1                | 0              | -3.735215               | -0.646487 | -2.485637 |
| 39               | 17               | 0              | -1.789467               | 2.933583  | -0.905073 |

SCF Done: E(RB+HF-LYP) = -2747.27151805 A. U. after 1 cycles  
Zero-point correction= 0.270136 (Hartree/Particle)  
Thermal correction to Energy= 0.305820  
Thermal correction to Enthalpy= 0.306764

Thermal correction to Gibbs Free Energy= 0.199037  
Sum of electronic and zero-point Energies= -2747.001382  
Sum of electronic and thermal Energies= -2746.965698  
Sum of electronic and thermal Enthalpies= -2746.964754  
Sum of electronic and thermal Free Energies= -2747.072481

TS7 in Figure 1

Stoichiometry C7H18CL3NA3O8 %chk=reimer.ts6na.chk

Standard orientation:

| Center<br>Number | Atomic<br>Number | Atomic<br>Type | Coordinates (Angstroms) |           |           |
|------------------|------------------|----------------|-------------------------|-----------|-----------|
|                  |                  |                | X                       | Y         | Z         |
| 1                | 6                | 0              | 0.461459                | 1.515002  | 0.155295  |
| 2                | 8                | 0              | 0.694347                | 2.413807  | -0.835807 |
| 3                | 6                | 0              | 0.411981                | 1.983546  | 1.482072  |
| 4                | 6                | 0              | 0.207409                | 0.139340  | -0.097673 |
| 5                | 6                | 0              | 0.142587                | 1.113327  | 2.541063  |
| 6                | 6                | 0              | -0.030210               | -0.718973 | 0.983155  |
| 7                | 6                | 0              | -0.076886               | -0.243854 | 2.294029  |
| 8                | 1                | 0              | 0.646521                | 3.029582  | 1.659584  |
| 9                | 6                | 0              | 0.359046                | -0.315782 | -1.536009 |
| 10               | 8                | 0              | 1.638876                | -0.593754 | -1.895788 |
| 11               | 1                | 0              | 0.149420                | 1.490203  | 3.560225  |
| 12               | 1                | 0              | -0.175148               | -1.778545 | 0.794573  |
| 13               | 1                | 0              | -0.252732               | -0.932788 | 3.113469  |
| 14               | 1                | 0              | 2.045114                | 0.360985  | -2.305505 |
| 15               | 1                | 0              | -0.112312               | 0.398241  | -2.217821 |
| 16               | 17               | 0              | -0.703826               | -1.880142 | -1.875841 |
| 17               | 11               | 0              | 3.391564                | -1.163885 | -0.460776 |
| 18               | 8                | 0              | 2.420456                | 1.646845  | -2.396341 |
| 19               | 1                | 0              | 1.487900                | 2.130058  | -1.579168 |
| 20               | 1                | 0              | 2.408401                | 2.032832  | -3.284523 |
| 21               | 1                | 0              | 4.078935                | 1.194735  | -1.625828 |
| 22               | 8                | 0              | 4.723446                | 0.570190  | -1.225091 |
| 23               | 1                | 0              | 4.822162                | 0.833947  | -0.287525 |
| 24               | 8                | 0              | 3.672042                | -2.990676 | 0.965348  |
| 25               | 1                | 0              | 4.388615                | -3.630586 | 1.084828  |
| 26               | 1                | 0              | 3.862416                | -2.238383 | 1.589792  |
| 27               | 17               | 0              | 3.986638                | -0.105858 | 1.894608  |
| 28               | 1                | 0              | -0.716377               | 3.445606  | -0.837772 |
| 29               | 8                | 0              | -1.633016               | 3.700743  | -0.548793 |
| 30               | 1                | 0              | -1.906910               | 4.466604  | -1.071713 |
| 31               | 11               | 0              | -2.262402               | 2.110434  | 0.896096  |
| 32               | 1                | 0              | -3.577589               | -3.246082 | 2.198024  |
| 33               | 8                | 0              | -3.421799               | -2.527056 | 1.569103  |
| 34               | 1                | 0              | -3.836091               | -1.717248 | 1.930735  |
| 35               | 11               | 0              | -3.074766               | -1.663256 | -0.498146 |
| 36               | 8                | 0              | -4.892430               | -1.106009 | -1.734450 |
| 37               | 1                | 0              | -5.451373               | -1.093440 | -2.524359 |
| 38               | 1                | 0              | -5.189235               | -0.384660 | -1.143004 |
| 39               | 17               | 0              | -4.208564               | 0.443315  | 0.894176  |



SCF Done: E(RB+HF-LYP) = -2747.22458483 A. U. after 1 cycles  
Zero-point correction= 0.262445 (Hartree/Particle)  
Thermal correction to Energy= 0.297746  
Thermal correction to Enthalpy= 0.298690  
Thermal correction to Gibbs Free Energy= 0.186071  
Sum of electronic and zero-point Energies= -2746.962140  
Sum of electronic and thermal Energies= -2746.926839  
Sum of electronic and thermal Enthalpies= -2746.925895  
Sum of electronic and thermal Free Energies= -2747.038514

product in Figure 1

Stoichiometry C7H18CL3NA3O8 %chk=reimer.step5forna.chk

Standard orientation:

| Center<br>Number | Atomic<br>Number | Atomic<br>Type | Coordinates (Angstroms) |           |           |
|------------------|------------------|----------------|-------------------------|-----------|-----------|
|                  |                  |                | X                       | Y         | Z         |
| 1                | 6                | 0              | 3.628348                | -1.135131 | 0.416670  |
| 2                | 8                | 0              | 2.437032                | -1.723282 | 0.751439  |
| 3                | 6                | 0              | 4.805232                | -1.797553 | 0.776873  |
| 4                | 6                | 0              | 3.700756                | 0.101737  | -0.267388 |
| 5                | 6                | 0              | 6.040380                | -1.224754 | 0.487586  |
| 6                | 6                | 0              | 4.961704                | 0.678724  | -0.517056 |
| 7                | 6                | 0              | 6.125805                | 0.022448  | -0.148779 |
| 8                | 1                | 0              | 4.729460                | -2.743599 | 1.303179  |
| 9                | 6                | 0              | 2.485308                | 0.728942  | -0.781228 |
| 10               | 8                | 0              | 2.394914                | 1.902709  | -1.155659 |
| 11               | 1                | 0              | 6.948547                | -1.747422 | 0.775321  |
| 12               | 1                | 0              | 4.992360                | 1.633822  | -1.032777 |
| 13               | 1                | 0              | 7.095165                | 0.463586  | -0.358773 |
| 14               | 1                | 0              | 0.530897                | 0.801574  | 1.755513  |
| 15               | 1                | 0              | 1.598393                | 0.082278  | -0.854230 |
| 16               | 17               | 0              | -1.039758               | 0.220926  | -1.317799 |
| 17               | 11               | 0              | 0.173637                | 2.616422  | -0.993821 |
| 18               | 8                | 0              | 0.442215                | -0.161681 | 1.577760  |
| 19               | 1                | 0              | 1.757598                | -1.066008 | 1.092316  |
| 20               | 1                | 0              | -0.183038               | -0.183743 | 0.820256  |
| 21               | 1                | 0              | 0.677714                | 3.324415  | 1.914114  |
| 22               | 8                | 0              | 0.233673                | 2.633551  | 1.398164  |
| 23               | 1                | 0              | -0.748261               | 2.777621  | 1.537913  |
| 24               | 8                | 0              | -1.293517               | 4.336882  | -1.123132 |
| 25               | 1                | 0              | -1.802014               | 4.800392  | -1.803673 |
| 26               | 1                | 0              | -1.938893               | 4.086813  | -0.413308 |
| 27               | 17               | 0              | -2.777566               | 2.995237  | 1.260987  |
| 28               | 1                | 0              | 1.308067                | -2.914203 | -0.129614 |
| 29               | 8                | 0              | 0.529803                | -3.383084 | -0.503640 |
| 30               | 1                | 0              | 0.633495                | -4.315834 | -0.264023 |
| 31               | 11               | 0              | -1.500857               | -2.376142 | -0.803688 |
| 32               | 1                | 0              | -5.807066               | -0.533519 | -0.937424 |
| 33               | 8                | 0              | -4.984518               | -0.647247 | -0.441041 |
| 34               | 1                | 0              | -4.778162               | -1.617881 | -0.457073 |
| 35               | 11               | 0              | -3.247985               | 0.571512  | 0.343191  |
| 36               | 8                | 0              | -2.383938               | -1.380469 | 1.377413  |

|    |    |   |           |           |           |
|----|----|---|-----------|-----------|-----------|
| 37 | 1  | 0 | -1.958939 | -1.466254 | 2.244982  |
| 38 | 1  | 0 | -2.979146 | -2.163285 | 1.246216  |
| 39 | 17 | 0 | -3.784996 | -3.511103 | -0.254477 |

---

SCF Done: E(RB3LYP) = -2747.32261446 A.U. after 1 cycles  
Zero-point correction= 0.269105 (Hartree/Particle)  
Thermal correction to Energy= 0.304969  
Thermal correction to Enthalpy= 0.305913  
Thermal correction to Gibbs Free Energy= 0.197873  
Sum of electronic and zero-point Energies= -2747.053510  
Sum of electronic and thermal Energies= -2747.017646  
Sum of electronic and thermal Enthalpies= -2747.016702  
Sum of electronic and thermal Free Energies= -2747.124742

TS8 in Figure 1

Stoichiometry C7H18CL3NA3O8 %chk=reimer.h12na.chk  
Standard orientation:

---

| Center<br>Number | Atomic<br>Number | Atomic<br>Type | Coordinates (Angstroms) |           |           |
|------------------|------------------|----------------|-------------------------|-----------|-----------|
|                  |                  |                | X                       | Y         | Z         |
| 1                | 6                | 0              | -1.701102               | -1.473469 | 0.627172  |
| 2                | 8                | 0              | -0.857119               | -1.116843 | 1.443925  |
| 3                | 6                | 0              | -1.596667               | -2.734554 | -0.105301 |
| 4                | 6                | 0              | -2.998719               | -0.643048 | 0.408146  |
| 5                | 6                | 0              | -2.654285               | -3.222908 | -0.789463 |
| 6                | 6                | 0              | -4.090080               | -1.278476 | -0.344231 |
| 7                | 6                | 0              | -3.907759               | -2.490443 | -0.906841 |
| 8                | 1                | 0              | -0.649711               | -3.257305 | -0.011408 |
| 9                | 6                | 0              | -2.893559               | 0.716793  | 0.801166  |
| 10               | 1                | 0              | -3.211210               | -0.285642 | 1.635833  |
| 11               | 1                | 0              | -2.579368               | -4.188128 | -1.282675 |
| 12               | 1                | 0              | -5.014496               | -0.727172 | -0.469766 |
| 13               | 1                | 0              | -4.707242               | -2.935028 | -1.493155 |
| 14               | 17               | 0              | 2.532813                | 3.445116  | -0.890060 |
| 15               | 17               | 0              | -4.324729               | 1.692670  | 0.450561  |
| 16               | 17               | 0              | -0.486925               | -0.119120 | -2.024820 |
| 17               | 11               | 0              | 1.853856                | -1.164817 | -1.396648 |
| 18               | 11               | 0              | 0.234705                | 2.155563  | -0.955343 |
| 19               | 1                | 0              | 0.857317                | 4.381973  | 0.000381  |
| 20               | 8                | 0              | -0.102014               | 4.375140  | 0.271099  |
| 21               | 1                | 0              | -0.423758               | 5.285927  | 0.199509  |
| 22               | 8                | 0              | 2.564170                | 0.482163  | 0.094468  |
| 23               | 1                | 0              | 3.426693                | 0.040817  | 0.393142  |
| 24               | 1                | 0              | 2.769551                | 1.408888  | -0.184348 |
| 25               | 1                | 0              | -1.270896               | 1.529067  | 1.325738  |
| 26               | 8                | 0              | -0.327277               | 1.860593  | 1.393251  |
| 27               | 1                | 0              | -0.362983               | 2.838577  | 1.420851  |
| 28               | 11               | 0              | 1.083776                | 0.114201  | 1.809817  |
| 29               | 8                | 0              | 4.406374                | -1.156135 | 0.913748  |
| 30               | 1                | 0              | 5.284888                | -0.892613 | 1.221788  |
| 31               | 1                | 0              | 3.389024                | -1.452856 | 1.949664  |
| 32               | 8                | 0              | 2.477706                | -1.604283 | 2.460696  |

|    |   |   |          |           |           |
|----|---|---|----------|-----------|-----------|
| 33 | 1 | 0 | 2.672017 | -2.079970 | 3.281062  |
| 34 | 1 | 0 | 4.281636 | -1.901601 | -0.464280 |
| 35 | 8 | 0 | 3.895878 | -2.327374 | -1.317916 |
| 36 | 1 | 0 | 4.638540 | -2.539426 | -1.900736 |
| 37 | 8 | 0 | 1.627632 | -3.007089 | 0.145912  |
| 38 | 1 | 0 | 2.488265 | -3.309754 | -0.202687 |
| 39 | 1 | 0 | 1.826550 | -2.680253 | 1.053068  |

-----  
SCF Done: E(RB3LYP) = -2747.12062827 A.U. after 1 cycles  
Zero-point correction= 0.262337 (Hartree/Particle)  
Thermal correction to Energy= 0.296148  
Thermal correction to Enthalpy= 0.297092  
Thermal correction to Gibbs Free Energy= 0.195364  
Sum of electronic and zero-point Energies= -2746.858291  
Sum of electronic and thermal Energies= -2746.824480  
Sum of electronic and thermal Enthalpies= -2746.823536  
Sum of electronic and thermal Free Energies= -2746.925264

TS9 in Figure 1

Stoichiometry C7H18CL3NA3O8 %chk=reimer.ts9na.chk

Standard orientation:

-----

| Center<br>Number | Atomic<br>Number | Atomic<br>Type | Coordinates (Angstroms) |           |           |
|------------------|------------------|----------------|-------------------------|-----------|-----------|
|                  |                  |                | X                       | Y         | Z         |
| 1                | 6                | 0              | -1.393735               | 1.782281  | -0.205371 |
| 2                | 8                | 0              | -1.729679               | 0.547561  | 0.085065  |
| 3                | 6                | 0              | -1.105684               | 2.731559  | 0.825966  |
| 4                | 6                | 0              | -1.220056               | 2.219164  | -1.549896 |
| 5                | 6                | 0              | -0.684875               | 4.033138  | 0.518934  |
| 6                | 6                | 0              | -0.784797               | 3.503792  | -1.832537 |
| 7                | 6                | 0              | -0.505358               | 4.423549  | -0.801631 |
| 8                | 1                | 0              | -1.310659               | 2.442258  | 1.853300  |
| 9                | 6                | 0              | 1.140265                | 1.157313  | 1.126243  |
| 10               | 1                | 0              | -1.396855               | 1.505706  | -2.352568 |
| 11               | 1                | 0              | -0.492692               | 4.734572  | 1.327155  |
| 12               | 1                | 0              | -0.646804               | 3.803911  | -2.868622 |
| 13               | 1                | 0              | -0.165791               | 5.426272  | -1.042154 |
| 14               | 17               | 0              | 1.394201                | -1.581147 | 1.059279  |
| 15               | 17               | 0              | 1.553473                | 1.473217  | 2.736176  |
| 16               | 17               | 0              | 2.172819                | 1.594750  | -0.107610 |
| 17               | 1                | 0              | 0.197882                | 0.678840  | 0.908422  |
| 18               | 11               | 0              | -1.266423               | -1.580328 | 0.805982  |
| 19               | 11               | 0              | 3.555815                | -1.805417 | -0.517731 |
| 20               | 8                | 0              | -3.155806               | -2.457562 | -0.387673 |
| 21               | 1                | 0              | -2.854010               | -3.113733 | -1.033677 |
| 22               | 8                | 0              | 5.720798                | -1.261570 | -0.776912 |
| 23               | 1                | 0              | 6.538446                | -0.983429 | -0.345747 |
| 24               | 1                | 0              | -3.019005               | -2.993028 | 1.223758  |
| 25               | 8                | 0              | -2.651514               | -2.866383 | 2.147912  |
| 26               | 1                | 0              | -2.540995               | -3.736340 | 2.556248  |
| 27               | 1                | 0              | -4.783163               | -2.693457 | -0.457613 |
| 28               | 8                | 0              | -5.791467               | -2.663474 | -0.576558 |

-----

|    |    |   |           |           |           |
|----|----|---|-----------|-----------|-----------|
| 29 | 1  | 0 | -6.182833 | -2.924742 | 0.270018  |
| 30 | 1  | 0 | 5.455107  | -2.788857 | -1.219455 |
| 31 | 8  | 0 | 4.809054  | -3.564978 | -1.366149 |
| 32 | 1  | 0 | 5.044586  | -3.994338 | -2.199313 |
| 33 | 1  | 0 | 4.865824  | -0.258309 | -1.561788 |
| 34 | 8  | 0 | 3.980627  | 0.129682  | -1.941883 |
| 35 | 1  | 0 | 4.080416  | 0.152485  | -2.904284 |
| 36 | 1  | 0 | -6.398549 | 0.240224  | -1.973554 |
| 37 | 8  | 0 | -5.716199 | -0.137041 | -1.402092 |
| 38 | 1  | 0 | -5.999923 | -1.058955 | -1.147426 |
| 39 | 11 | 0 | -3.547614 | -0.307861 | -0.876431 |

-----  
SCF Done: E(RB3LYP) = -2747.09188890 A. U. after 1 cycles  
Zero-point correction= 0.262014 (Hartree/Particle)  
Thermal correction to Energy= 0.297586  
Thermal correction to Enthalpy= 0.298531  
Thermal correction to Gibbs Free Energy= 0.186064  
Sum of electronic and zero-point Energies= -2746.829874  
Sum of electronic and thermal Energies= -2746.794303  
Sum of electronic and thermal Enthalpies= -2746.793358  
Sum of electronic and thermal Free Energies= -2746.905825

#### RB3LYP/6-31+G(d)

precursor in Figure 1

Stoichiometry C7H18CL3NA3O8 %chk=reimer.na.pre.chk

Standard orientation:

| Center<br>Number | Atomic<br>Number | Atomic<br>Type | Coordinates (Angstroms) |           |           |
|------------------|------------------|----------------|-------------------------|-----------|-----------|
|                  |                  |                | X                       | Y         | Z         |
| 1                | 6                | 0              | 3.368817                | -0.952123 | -0.284252 |
| 2                | 17               | 0              | 3.682720                | 0.812347  | 0.015833  |
| 3                | 17               | 0              | 3.299657                | -1.279348 | -2.033880 |
| 4                | 17               | 0              | 4.612047                | -1.944155 | 0.523404  |
| 5                | 11               | 0              | -1.481920               | -1.552537 | 0.305407  |
| 6                | 1                | 0              | 2.397897                | -1.191225 | 0.160279  |
| 7                | 8                | 0              | 0.664460                | 0.411632  | 2.641909  |
| 8                | 1                | 0              | 1.118141                | 0.324048  | 3.491964  |
| 9                | 1                | 0              | -2.822039               | -2.724353 | 2.962314  |
| 10               | 8                | 0              | -2.786765               | -2.052797 | 2.266265  |
| 11               | 1                | 0              | -2.551681               | -1.175898 | 2.704657  |
| 12               | 1                | 0              | -2.261671               | 0.699628  | 1.986112  |
| 13               | 8                | 0              | -2.046043               | 0.392877  | 2.897996  |
| 14               | 1                | 0              | -1.045544               | 0.423780  | 2.928228  |
| 15               | 1                | 0              | -3.941083               | -2.307983 | -0.524808 |
| 16               | 8                | 0              | -4.631367               | -1.824107 | 0.032261  |
| 17               | 1                | 0              | -4.321305               | -1.948531 | 0.949459  |
| 18               | 8                | 0              | -2.531067               | -2.465707 | -1.423569 |
| 19               | 1                | 0              | -2.375241               | -3.348896 | -1.785886 |
| 20               | 1                | 0              | -2.938250               | -1.474237 | -2.550189 |
| 21               | 1                | 0              | 0.717189                | -0.846479 | 1.857020  |
| 22               | 8                | 0              | 0.690368                | -1.622868 | 1.143702  |

|    |    |   |           |           |           |
|----|----|---|-----------|-----------|-----------|
| 23 | 1  | 0 | 0.896588  | -2.439839 | 1.622563  |
| 24 | 8  | 0 | -3.312695 | -0.638281 | -3.036109 |
| 25 | 1  | 0 | -3.693868 | -0.932569 | -3.874152 |
| 26 | 11 | 0 | -4.002043 | 0.072046  | -1.030241 |
| 27 | 8  | 0 | -2.225743 | 0.758486  | 0.127600  |
| 28 | 6  | 0 | -1.410290 | 1.727460  | -0.221213 |
| 29 | 6  | 0 | -0.456893 | 1.568840  | -1.271546 |
| 30 | 6  | 0 | 0.438494  | 2.588992  | -1.603777 |
| 31 | 6  | 0 | 0.438038  | 3.809712  | -0.909134 |
| 32 | 6  | 0 | -1.406819 | 2.984207  | 0.457069  |
| 33 | 6  | 0 | -0.506041 | 3.996620  | 0.114313  |
| 34 | 1  | 0 | -0.458665 | 0.636188  | -1.831163 |
| 35 | 1  | 0 | 1.144899  | 2.429704  | -2.415580 |
| 36 | 1  | 0 | 1.127341  | 4.603813  | -1.181631 |
| 37 | 1  | 0 | -2.128683 | 3.138829  | 1.255370  |
| 38 | 1  | 0 | -0.542929 | 4.943631  | 0.649626  |
| 39 | 11 | 0 | 1.048751  | 1.859029  | 1.098975  |

-----  
SCF Done: E(RB3LYP) = -2747.16921784 A.U. after 1 cycles  
Zero-point correction= 0.267146 (Hartree/Particle)  
Thermal correction to Energy= 0.300565  
Thermal correction to Enthalpy= 0.301509  
Thermal correction to Gibbs Free Energy= 0.196959  
Sum of electronic and zero-point Energies= -2746.902072  
Sum of electronic and thermal Energies= -2746.868653  
Sum of electronic and thermal Enthalpies= -2746.867709  
Sum of electronic and thermal Free Energies= -2746.972258

TS1 in Figure 1

Stoichiometry C7H18CL3NA3O8 %chk=reimer.na.ts1.chk

Standard orientation:

-----

| Center<br>Number | Atomic<br>Number | Atomic<br>Type | Coordinates (Angstroms) |           |           |
|------------------|------------------|----------------|-------------------------|-----------|-----------|
|                  |                  |                | X                       | Y         | Z         |
| 1                | 6                | 0              | 2.057111                | -0.897706 | -0.721338 |
| 2                | 17               | 0              | 2.754852                | 0.283705  | -1.986629 |
| 3                | 17               | 0              | 0.316003                | -1.279035 | -1.274675 |
| 4                | 17               | 0              | 3.003677                | -2.433626 | -0.834162 |
| 5                | 11               | 0              | -0.713252               | -2.482095 | 1.224020  |
| 6                | 1                | 0              | 2.027641                | -0.308147 | 0.618775  |
| 7                | 8                | 0              | 1.999610                | 0.166346  | 1.670626  |
| 8                | 1                | 0              | 1.378460                | 0.929816  | 1.579643  |
| 9                | 8                | 0              | -3.841256               | -2.549316 | -0.124556 |
| 10               | 1                | 0              | -4.759608               | -2.753750 | 0.103128  |
| 11               | 1                | 0              | -3.186703               | -1.626124 | 0.761820  |
| 12               | 1                | 0              | 1.238959                | -2.280070 | 3.513577  |
| 13               | 8                | 0              | 0.724400                | -1.851900 | 2.815680  |
| 14               | 1                | 0              | 1.258775                | -1.056553 | 2.503466  |
| 15               | 1                | 0              | -3.640133               | -1.497645 | -1.328205 |
| 16               | 8                | 0              | -3.341539               | -0.691689 | -1.872119 |
| 17               | 1                | 0              | -3.288641               | -0.966889 | -2.797292 |
| 18               | 8                | 0              | -2.468715               | -0.970117 | 1.213313  |

|    |    |   |           |           |           |
|----|----|---|-----------|-----------|-----------|
| 19 | 1  | 0 | -2.810834 | -0.687478 | 2.073981  |
| 20 | 1  | 0 | -2.768099 | -3.711650 | 0.154231  |
| 21 | 1  | 0 | 3.549156  | 0.902339  | 1.870734  |
| 22 | 8  | 0 | 4.264501  | 1.560611  | 1.631309  |
| 23 | 1  | 0 | 5.118873  | 1.120754  | 1.739450  |
| 24 | 8  | 0 | -1.925858 | -4.203899 | 0.446537  |
| 25 | 1  | 0 | -1.752995 | -4.891692 | -0.210881 |
| 26 | 11 | 0 | 2.853355  | 2.280356  | 0.032654  |
| 27 | 1  | 0 | -3.496808 | 3.001759  | 1.924855  |
| 28 | 1  | 0 | -1.117364 | 2.498643  | 2.412045  |
| 29 | 6  | 0 | -2.228250 | 3.335228  | -1.212356 |
| 30 | 6  | 0 | -0.887308 | 3.043198  | -0.946384 |
| 31 | 6  | 0 | -0.431492 | 2.737214  | 0.375123  |
| 32 | 6  | 0 | -2.769794 | 3.010522  | 1.114445  |
| 33 | 6  | 0 | -1.433157 | 2.721657  | 1.395422  |
| 34 | 1  | 0 | -2.528005 | 3.575668  | -2.230751 |
| 35 | 1  | 0 | -0.152918 | 3.060957  | -1.749024 |
| 36 | 8  | 0 | 0.813969  | 2.462994  | 0.632451  |
| 37 | 6  | 0 | -3.190152 | 3.315363  | -0.190551 |
| 38 | 1  | 0 | -4.230578 | 3.544124  | -0.401629 |
| 39 | 11 | 0 | -2.195455 | 0.607294  | -0.448227 |

---

SCF Done: E(RB3LYP) = -2747.14204245 A. U. after 1 cycles  
Zero-point correction= 0.260020 (Hartree/Particle)  
Thermal correction to Energy= 0.294108  
Thermal correction to Enthalpy= 0.295052  
Thermal correction to Gibbs Free Energy= 0.189205  
Sum of electronic and zero-point Energies= -2746.882023  
Sum of electronic and thermal Energies= -2746.847934  
Sum of electronic and thermal Enthalpies= -2746.846990  
Sum of electronic and thermal Free Energies= -2746.952837

Int1 in Figure 1

Stoichiometry C7H18CL3NA3O8 %chk=reimer.na.int1.chk  
Standard orientation:

---

| Center<br>Number | Atomic<br>Number | Atomic<br>Type | Coordinates (Angstroms) |           |           |
|------------------|------------------|----------------|-------------------------|-----------|-----------|
|                  |                  |                | X                       | Y         | Z         |
| 1                | 6                | 0              | 3.405884                | -0.293922 | -0.139427 |
| 2                | 8                | 0              | 2.118497                | -0.200382 | 0.233794  |
| 3                | 6                | 0              | 3.756919                | -0.728745 | -1.436381 |
| 4                | 6                | 0              | 4.451674                | 0.039315  | 0.748692  |
| 5                | 6                | 0              | 5.094876                | -0.829372 | -1.823479 |
| 6                | 6                | 0              | 5.786591                | -0.064344 | 0.353623  |
| 7                | 6                | 0              | 6.122296                | -0.498999 | -0.933545 |
| 8                | 1                | 0              | 2.961964                | -0.985002 | -2.135146 |
| 9                | 6                | 0              | -2.007157               | -1.895623 | -0.226595 |
| 10               | 1                | 0              | 4.197877                | 0.380504  | 1.750051  |
| 11               | 1                | 0              | 5.335029                | -1.168189 | -2.829325 |
| 12               | 1                | 0              | 6.572069                | 0.198881  | 1.059301  |
| 13               | 1                | 0              | 7.162847                | -0.577890 | -1.236774 |
| 14               | 17               | 0              | -3.081616               | -1.991588 | 1.325398  |

|    |    |   |           |           |           |
|----|----|---|-----------|-----------|-----------|
| 15 | 17 | 0 | -1.295649 | -3.633344 | -0.438126 |
| 16 | 17 | 0 | -3.221750 | -1.692399 | -1.629536 |
| 17 | 11 | 0 | -1.931614 | 0.698237  | -0.963324 |
| 18 | 11 | 0 | 0.493682  | -1.647633 | 0.376163  |
| 19 | 1  | 0 | -1.115214 | -1.880286 | 2.583582  |
| 20 | 8  | 0 | -0.143457 | -1.776136 | 2.661044  |
| 21 | 1  | 0 | 0.147272  | -2.452056 | 3.293167  |
| 22 | 8  | 0 | -2.423845 | 2.102471  | 0.803155  |
| 23 | 1  | 0 | -2.567226 | 2.999577  | 0.256494  |
| 24 | 1  | 0 | -3.162087 | 2.004488  | 1.421407  |
| 25 | 1  | 0 | 1.607519  | 0.539863  | 1.689835  |
| 26 | 8  | 0 | 1.026202  | 0.955050  | 2.391980  |
| 27 | 1  | 0 | 0.627516  | 0.198740  | 2.855352  |
| 28 | 11 | 0 | -0.156355 | 2.548325  | 1.286392  |
| 29 | 8  | 0 | -2.360824 | 4.126907  | -0.665721 |
| 30 | 1  | 0 | -3.118674 | 4.721098  | -0.761956 |
| 31 | 1  | 0 | -1.111049 | 4.705308  | 0.185672  |
| 32 | 8  | 0 | -0.319292 | 4.744678  | 0.820854  |
| 33 | 1  | 0 | 0.270796  | 5.444522  | 0.510046  |
| 34 | 1  | 0 | -1.997795 | 3.207332  | -1.905297 |
| 35 | 8  | 0 | -1.705037 | 2.413886  | -2.485097 |
| 36 | 1  | 0 | -1.996413 | 2.594823  | -3.389725 |
| 37 | 1  | 0 | 1.121723  | 0.834225  | -0.531104 |
| 38 | 8  | 0 | 0.278426  | 1.363073  | -0.708757 |
| 39 | 1  | 0 | 0.352405  | 1.834221  | -1.555968 |

-----  
SCF Done: E(RB3LYP) = -2747.15560165 A. U. after 1 cycles  
Zero-point correction= 0.264237 (Hartree/Particle)  
Thermal correction to Energy= 0.298739  
Thermal correction to Enthalpy= 0.299683  
Thermal correction to Gibbs Free Energy= 0.193040  
Sum of electronic and zero-point Energies= -2746.891365  
Sum of electronic and thermal Energies= -2746.856863  
Sum of electronic and thermal Enthalpies= -2746.855918  
Sum of electronic and thermal Free Energies= -2746.962561

TS2 in Figure 1

Stoichiometry C7H18CL3NA3O8 %chk=reimer.na.ts2.chk

Standard orientation:

-----

| Center<br>Number | Atomic<br>Number | Atomic<br>Type | Coordinates (Angstroms) |           |           |
|------------------|------------------|----------------|-------------------------|-----------|-----------|
|                  |                  |                | X                       | Y         | Z         |
| 1                | 6                | 0              | 1.197500                | -1.034176 | 0.453262  |
| 2                | 8                | 0              | -0.057557               | -0.725192 | 0.326949  |
| 3                | 6                | 0              | 1.714937                | -1.680354 | 1.611074  |
| 4                | 6                | 0              | 2.144531                | -0.697689 | -0.593966 |
| 5                | 6                | 0              | 3.057834                | -2.024380 | 1.696654  |
| 6                | 6                | 0              | 3.485699                | -1.174117 | -0.516109 |
| 7                | 6                | 0              | 3.956617                | -1.780087 | 0.630815  |
| 8                | 1                | 0              | 1.039062                | -1.886942 | 2.438139  |
| 9                | 6                | 0              | 2.281129                | 1.372603  | -0.245160 |
| 10               | 1                | 0              | 1.730224                | -0.481637 | -1.574800 |

|    |    |   |           |           |           |
|----|----|---|-----------|-----------|-----------|
| 11 | 1  | 0 | 3.424800  | -2.500409 | 2.603517  |
| 12 | 1  | 0 | 4.153464  | -0.981713 | -1.351221 |
| 13 | 1  | 0 | 4.998120  | -2.073892 | 0.719062  |
| 14 | 17 | 0 | 3.148893  | 1.611575  | 1.289841  |
| 15 | 17 | 0 | 3.327156  | 1.957221  | -1.596141 |
| 16 | 17 | 0 | -1.756865 | 3.588677  | 0.346415  |
| 17 | 11 | 0 | -1.064922 | -2.244218 | -1.177895 |
| 18 | 11 | 0 | -0.249786 | 1.608349  | -0.426524 |
| 19 | 8  | 0 | -1.868797 | 1.507425  | -2.138731 |
| 20 | 1  | 0 | -2.101129 | 2.419084  | -1.870113 |
| 21 | 1  | 0 | -2.654194 | 0.963055  | -1.874034 |
| 22 | 8  | 0 | -2.029485 | -1.397439 | -3.036326 |
| 23 | 1  | 0 | -2.814497 | -1.003197 | -2.549814 |
| 24 | 1  | 0 | -1.654544 | -0.644118 | -3.520382 |
| 25 | 1  | 0 | 1.130527  | -3.621992 | -0.033782 |
| 26 | 8  | 0 | 0.447555  | -3.909390 | -0.666528 |
| 27 | 1  | 0 | 0.781158  | -4.720914 | -1.077717 |
| 28 | 11 | 0 | -1.934199 | -0.731517 | 1.655556  |
| 29 | 8  | 0 | -3.787892 | -0.308545 | -1.327934 |
| 30 | 1  | 0 | -4.704701 | -0.264484 | -1.638580 |
| 31 | 1  | 0 | -3.465767 | -1.450429 | -0.463340 |
| 32 | 8  | 0 | -2.959602 | -2.165998 | 0.136520  |
| 33 | 1  | 0 | -3.597207 | -2.858419 | 0.361974  |
| 34 | 1  | 0 | -3.660206 | 0.684061  | 0.160628  |
| 35 | 8  | 0 | -3.304444 | 1.015286  | 1.027587  |
| 36 | 1  | 0 | -2.942425 | 1.927390  | 0.857695  |
| 37 | 8  | 0 | -3.228471 | -0.121081 | 3.453722  |
| 38 | 1  | 0 | -3.587083 | 0.534811  | 2.811310  |
| 39 | 1  | 0 | -3.283712 | 0.272603  | 4.335505  |

---

SCF Done: E(RB+HF-LYP) = -2747.13915723 A. U. after 1 cycles  
Zero-point correction= 0.264407 (Hartree/Particle)  
Thermal correction to Energy= 0.299001  
Thermal correction to Enthalpy= 0.299945  
Thermal correction to Gibbs Free Energy= 0.194439  
Sum of electronic and zero-point Energies= -2746.874750  
Sum of electronic and thermal Energies= -2746.840157  
Sum of electronic and thermal Enthalpies= -2746.839212  
Sum of electronic and thermal Free Energies= -2746.944718

Int3 in Figure 1

Stoichiometry C7H18CL3NA3O8 %chk=reimer.na.int3.chk  
Standard orientation:

---

| Center<br>Number | Atomic<br>Number | Atomic<br>Type | Coordinates (Angstroms) |           |           |
|------------------|------------------|----------------|-------------------------|-----------|-----------|
|                  |                  |                | X                       | Y         | Z         |
| 1                | 6                | 0              | -1.212412               | -1.155936 | -0.061541 |
| 2                | 8                | 0              | -0.289622               | -0.285885 | -0.069657 |
| 3                | 6                | 0              | -1.140933               | -2.348189 | -0.847287 |
| 4                | 6                | 0              | -2.449828               | -0.898037 | 0.768375  |
| 5                | 6                | 0              | -2.148026               | -3.278747 | -0.795610 |
| 6                | 6                | 0              | -3.426663               | -2.016183 | 0.817723  |



|    |    |   |           |           |           |
|----|----|---|-----------|-----------|-----------|
| 7  | 6  | 0 | -3.305014 | -3.120552 | 0.039345  |
| 8  | 1  | 0 | -0.264942 | -2.499001 | -1.472140 |
| 9  | 6  | 0 | -3.080370 | 0.484354  | 0.238039  |
| 10 | 1  | 0 | -2.138594 | -0.618218 | 1.783659  |
| 11 | 1  | 0 | -2.068239 | -4.174991 | -1.407817 |
| 12 | 1  | 0 | -4.299884 | -1.871523 | 1.447038  |
| 13 | 1  | 0 | -4.070719 | -3.891172 | 0.034630  |
| 14 | 17 | 0 | -3.855434 | 0.172240  | -1.443644 |
| 15 | 17 | 0 | -4.441428 | 0.945886  | 1.398316  |
| 16 | 17 | 0 | 0.904389  | 2.805595  | -1.688623 |
| 17 | 11 | 0 | 1.573960  | 0.230521  | -1.357664 |
| 18 | 11 | 0 | -1.300199 | 2.019048  | -0.334959 |
| 19 | 8  | 0 | 0.115527  | 3.256849  | 1.224299  |
| 20 | 1  | 0 | -0.017460 | 4.123661  | 1.637741  |
| 21 | 1  | 0 | 0.631846  | 3.402872  | 0.391056  |
| 22 | 8  | 0 | 3.405673  | 1.118946  | -0.168625 |
| 23 | 1  | 0 | 4.207134  | 0.639141  | -0.588442 |
| 24 | 1  | 0 | 3.343676  | 2.023427  | -0.515810 |
| 25 | 1  | 0 | 0.478960  | 0.287499  | 1.599464  |
| 26 | 8  | 0 | 1.054601  | 0.751865  | 2.242881  |
| 27 | 1  | 0 | 0.818877  | 1.693640  | 2.115829  |
| 28 | 11 | 0 | 3.141198  | -0.041295 | 1.792831  |
| 29 | 8  | 0 | 5.088014  | -0.617915 | -0.967488 |
| 30 | 1  | 0 | 5.850660  | -0.490903 | -1.549323 |
| 31 | 1  | 0 | 5.359593  | -0.939479 | 0.571990  |
| 32 | 8  | 0 | 5.226210  | -1.081912 | 1.577750  |
| 33 | 1  | 0 | 6.102798  | -1.120005 | 1.985610  |
| 34 | 1  | 0 | 3.876574  | -1.280190 | -1.574651 |
| 35 | 8  | 0 | 2.903223  | -1.611435 | -1.782453 |
| 36 | 1  | 0 | 2.964039  | -2.265183 | -2.494039 |
| 37 | 8  | 0 | 2.700940  | -2.198472 | 0.977667  |
| 38 | 1  | 0 | 2.656405  | -2.220096 | -0.003580 |
| 39 | 1  | 0 | 3.619704  | -2.450328 | 1.184391  |

---

SCF Done: E(RB3LYP) = -2747.16595579 A. U. after 1 cycles  
Zero-point correction= 0.266233 (Hartree/Particle)  
Thermal correction to Energy= 0.300367  
Thermal correction to Enthalpy= 0.301312  
Thermal correction to Gibbs Free Energy= 0.197896  
Sum of electronic and zero-point Energies= -2746.899723  
Sum of electronic and thermal Energies= -2746.865588  
Sum of electronic and thermal Enthalpies= -2746.864644  
Sum of electronic and thermal Free Energies= -2746.968060

TS3 in Figure 1

Stoichiometry C7H18CL3NA3O8 %chk=reimer.na.ts3.chk

Standard orientation:

---

| Center<br>Number | Atomic<br>Number | Atomic<br>Type | Coordinates (Angstroms) |          |          |
|------------------|------------------|----------------|-------------------------|----------|----------|
|                  |                  |                | X                       | Y        | Z        |
| 1                | 6                | 0              | 1.952154                | 1.036926 | 0.745716 |
| 2                | 8                | 0              | 0.785480                | 0.854360 | 1.186329 |

---

|    |    |   |           |           |           |
|----|----|---|-----------|-----------|-----------|
| 3  | 6  | 0 | 2.438361  | 2.337902  | 0.379171  |
| 4  | 6  | 0 | 2.870140  | -0.162436 | 0.595923  |
| 5  | 6  | 0 | 3.750633  | 2.505243  | 0.028126  |
| 6  | 6  | 0 | 4.294671  | 0.162231  | 0.296970  |
| 7  | 6  | 0 | 4.697720  | 1.418500  | -0.002917 |
| 8  | 1  | 0 | 1.748459  | 3.176761  | 0.422001  |
| 9  | 6  | 0 | 2.207353  | -1.174173 | -0.450300 |
| 10 | 1  | 0 | 2.824058  | -0.723432 | 1.540013  |
| 11 | 1  | 0 | 4.101125  | 3.502112  | -0.232368 |
| 12 | 1  | 0 | 4.983544  | -0.676290 | 0.248024  |
| 13 | 1  | 0 | 5.726339  | 1.624956  | -0.284732 |
| 14 | 17 | 0 | 3.055249  | -2.814148 | -0.172050 |
| 15 | 17 | 0 | 2.621301  | -0.612295 | -2.162046 |
| 16 | 8  | 0 | -2.264787 | 0.083534  | 0.510792  |
| 17 | 1  | 0 | -2.855798 | -0.638045 | 0.894278  |
| 18 | 1  | 0 | -1.661129 | -0.442384 | -0.084177 |
| 19 | 1  | 0 | 0.520093  | -1.453529 | -0.728104 |
| 20 | 8  | 0 | -0.518933 | -1.512461 | -0.704787 |
| 21 | 1  | 0 | -0.873689 | -2.362982 | -1.035209 |
| 22 | 1  | 0 | -0.799964 | 5.074614  | 1.689106  |
| 23 | 8  | 0 | -0.740113 | 4.337456  | 1.064210  |
| 24 | 1  | 0 | -1.421257 | 4.495715  | 0.371644  |
| 25 | 11 | 0 | -3.692065 | 0.868137  | -1.190020 |
| 26 | 11 | 0 | -1.161679 | 2.072489  | 0.810484  |
| 27 | 1  | 0 | -1.552760 | -3.260841 | 3.216487  |
| 28 | 8  | 0 | -1.532653 | -2.437802 | 2.709464  |
| 29 | 1  | 0 | -2.376081 | -2.413375 | 2.137552  |
| 30 | 8  | 0 | -3.566860 | -2.143671 | 1.065853  |
| 31 | 1  | 0 | -4.377618 | -2.304865 | 1.572346  |
| 32 | 17 | 0 | -2.810911 | 3.280604  | -0.987713 |
| 33 | 1  | 0 | -4.241497 | -1.624796 | -0.441582 |
| 34 | 8  | 0 | -4.492630 | -1.235257 | -1.330546 |
| 35 | 1  | 0 | -4.181879 | -1.904525 | -1.961742 |
| 36 | 1  | 0 | -2.894589 | -3.221449 | -0.141073 |
| 37 | 8  | 0 | -2.460519 | -3.538290 | -0.981550 |
| 38 | 1  | 0 | -2.421227 | -4.504405 | -0.936082 |
| 39 | 11 | 0 | -0.046262 | -1.292633 | 1.516820  |

---

SCF Done: E(RB3LYP) = -2747.15552274 A. U. after 1 cycles  
Zero-point correction= 0.266072 (Hartree/Particle)  
Thermal correction to Energy= 0.299610  
Thermal correction to Enthalpy= 0.300554  
Thermal correction to Gibbs Free Energy= 0.197332  
Sum of electronic and zero-point Energies= -2746.889451  
Sum of electronic and thermal Energies= -2746.855912  
Sum of electronic and thermal Enthalpies= -2746.854968  
Sum of electronic and thermal Free Energies= -2746.958191

Int4 in Figure 1

Stoichiometry C7H18CL3NA3O8 %chk=reimer.na.int4.chk

Standard orientation:

---

| Center | Atomic | Atomic | Coordinates (Angstroms) |
|--------|--------|--------|-------------------------|
|--------|--------|--------|-------------------------|

| Number | Number | Type | X         | Y         | Z         |
|--------|--------|------|-----------|-----------|-----------|
| 1      | 6      | 0    | 3.437339  | -1.651689 | -0.220026 |
| 2      | 8      | 0    | 2.286046  | -2.101345 | -0.229629 |
| 3      | 6      | 0    | 4.572624  | -2.469624 | 0.172996  |
| 4      | 6      | 0    | 3.717634  | -0.211243 | -0.689684 |
| 5      | 6      | 0    | 5.821255  | -1.939649 | 0.257893  |
| 6      | 6      | 0    | 5.121430  | 0.275601  | -0.459263 |
| 7      | 6      | 0    | 6.102703  | -0.548202 | -0.045295 |
| 8      | 1      | 0    | 4.364123  | -3.502325 | 0.435824  |
| 9      | 6      | 0    | 2.618125  | 0.757789  | -0.217570 |
| 10     | 1      | 0    | 3.585422  | -0.268531 | -1.786774 |
| 11     | 1      | 0    | 6.645556  | -2.570389 | 0.584291  |
| 12     | 1      | 0    | 5.320691  | 1.320696  | -0.677173 |
| 13     | 1      | 0    | 7.117064  | -0.181135 | 0.081434  |
| 14     | 17     | 0    | 2.767952  | 2.352296  | -1.055179 |
| 15     | 17     | 0    | 2.691633  | 0.975609  | 1.578836  |
| 16     | 8      | 0    | -2.668621 | -0.044151 | 0.479242  |
| 17     | 1      | 0    | -2.993398 | -0.948589 | 0.775905  |
| 18     | 1      | 0    | -1.897449 | -0.190279 | -0.142522 |
| 19     | 1      | 0    | 1.604179  | 0.402815  | -0.448581 |
| 20     | 8      | 0    | -0.362287 | 0.135920  | -0.810084 |
| 21     | 1      | 0    | -0.429217 | 0.320764  | -1.759631 |
| 22     | 1      | 0    | -1.323468 | 4.339538  | 2.288350  |
| 23     | 8      | 0    | -1.285226 | 3.910833  | 1.421894  |
| 24     | 1      | 0    | -2.110821 | 4.149209  | 0.941191  |
| 25     | 11     | 0    | -4.555477 | 0.958739  | -0.321351 |
| 26     | 11     | 0    | -1.306592 | 1.911136  | 0.292064  |
| 27     | 1      | 0    | -1.773229 | -4.295813 | -0.384496 |
| 28     | 8      | 0    | -1.538590 | -3.488011 | 0.093856  |
| 29     | 1      | 0    | -2.422629 | -3.127115 | 0.478957  |
| 30     | 8      | 0    | -3.722239 | -2.439733 | 1.018521  |
| 31     | 1      | 0    | -3.804617 | -2.642125 | 1.963128  |
| 32     | 17     | 0    | -3.483836 | 3.289956  | -0.671844 |
| 33     | 1      | 0    | -5.042006 | -1.465322 | 0.508345  |
| 34     | 8      | 0    | -5.732148 | -0.903865 | 0.047636  |
| 35     | 1      | 0    | -6.188118 | -1.561781 | -0.505148 |
| 36     | 1      | 0    | -4.789751 | -3.430352 | 0.015939  |
| 37     | 8      | 0    | -5.452490 | -3.758414 | -0.650010 |
| 38     | 1      | 0    | -5.923010 | -4.490643 | -0.226280 |
| 39     | 11     | 0    | 0.037590  | -1.972606 | -0.278832 |

SCF Done: E(RB3LYP) = -2747.19258446 A. U. after 1 cycles  
Zero-point correction= 0.267303 (Hartree/Particle)  
Thermal correction to Energy= 0.302188  
Thermal correction to Enthalpy= 0.303132  
Thermal correction to Gibbs Free Energy= 0.192236  
Sum of electronic and zero-point Energies= -2746.925281  
Sum of electronic and thermal Energies= -2746.890396  
Sum of electronic and thermal Enthalpies= -2746.889452  
Sum of electronic and thermal Free Energies= -2747.000349

TS4 in Figure 1

Stoichiometry C7H18CL3NA3O8 %chk=reimer.na.ts4.chk  
Standard orientation:

| Center<br>Number | Atomic<br>Number | Atomic<br>Type | Coordinates (Angstroms) |           |           |
|------------------|------------------|----------------|-------------------------|-----------|-----------|
|                  |                  |                | X                       | Y         | Z         |
| 1                | 6                | 0              | 2.758871                | 1.141810  | 0.564566  |
| 2                | 8                | 0              | 3.088791                | 1.889339  | -0.387353 |
| 3                | 6                | 0              | 2.790079                | 1.591146  | 1.938913  |
| 4                | 6                | 0              | 2.180400                | -0.225622 | 0.297047  |
| 5                | 6                | 0              | 2.385785                | 0.775666  | 2.957517  |
| 6                | 6                | 0              | 1.878027                | -1.063323 | 1.470943  |
| 7                | 6                | 0              | 1.921990                | -0.568234 | 2.732516  |
| 8                | 1                | 0              | 3.165893                | 2.593605  | 2.123118  |
| 9                | 6                | 0              | 2.858811                | -0.920081 | -0.871950 |
| 10               | 1                | 0              | 1.138981                | 0.145550  | -0.191702 |
| 11               | 1                | 0              | 2.427391                | 1.144052  | 3.980707  |
| 12               | 1                | 0              | 1.574155                | -2.092046 | 1.296295  |
| 13               | 1                | 0              | 1.636232                | -1.180631 | 3.582523  |
| 14               | 17               | 0              | 1.837614                | -2.254531 | -1.570641 |
| 15               | 17               | 0              | 4.489100                | -1.586155 | -0.435169 |
| 16               | 8                | 0              | 0.093217                | 0.929574  | -1.064451 |
| 17               | 1                | 0              | -0.961225               | 1.808034  | -0.409417 |
| 18               | 1                | 0              | -0.469720               | 0.292288  | -1.538649 |
| 19               | 1                | 0              | 3.030377                | -0.221500 | -1.684677 |
| 20               | 8                | 0              | -0.058162               | 4.356269  | -1.119759 |
| 21               | 1                | 0              | -0.098486               | 5.281538  | -0.841747 |
| 22               | 1                | 0              | -0.788282               | 3.866488  | -0.647884 |
| 23               | 8                | 0              | -1.686057               | 2.491370  | -0.095807 |
| 24               | 1                | 0              | -1.811931               | 2.318090  | 0.858034  |
| 25               | 11               | 0              | -2.673009               | -1.821029 | 1.365960  |
| 26               | 11               | 0              | 1.342753                | 2.655483  | -1.582995 |
| 27               | 1                | 0              | -2.572833               | -0.447228 | -3.048950 |
| 28               | 8                | 0              | -2.426178               | -0.405691 | -2.092770 |
| 29               | 1                | 0              | -2.836956               | -1.252216 | -1.698498 |
| 30               | 8                | 0              | -3.510639               | -2.313475 | -0.692494 |
| 31               | 1                | 0              | -3.977664               | -3.054934 | -1.104896 |
| 32               | 17               | 0              | -3.197760               | 0.582620  | 2.087170  |
| 33               | 1                | 0              | -1.903599               | -3.007310 | -0.375475 |
| 34               | 8                | 0              | -1.156573               | -3.146519 | 0.269835  |
| 35               | 1                | 0              | -0.333958               | -2.940150 | -0.201156 |
| 36               | 1                | 0              | -4.774721               | -1.133253 | -0.642834 |
| 37               | 8                | 0              | -5.318095               | -0.290359 | -0.650398 |
| 38               | 1                | 0              | -5.760306               | -0.257092 | 0.211877  |
| 39               | 11               | 0              | -3.463361               | 1.079328  | -0.594012 |

SCF Done: E(RB3LYP) = -2747.18567379 A. U. after 1 cycles  
Zero-point correction= 0.266149 (Hartree/Particle)  
Thermal correction to Energy= 0.299033  
Thermal correction to Enthalpy= 0.299977  
Thermal correction to Gibbs Free Energy= 0.197931  
Sum of electronic and zero-point Energies= -2746.919525  
Sum of electronic and thermal Energies= -2746.886641

Sum of electronic and thermal Enthalpies= -2746.885697  
Sum of electronic and thermal Free Energies= -2746.987743

Int5 in Figure 1

Stoichiometry C7H18CL3NA3O8 %chk=reimer.na.int5.chk  
Standard orientation:

| Center<br>Number | Atomic<br>Number | Atomic<br>Type | Coordinates (Angstroms) |           |           |
|------------------|------------------|----------------|-------------------------|-----------|-----------|
|                  |                  |                | X                       | Y         | Z         |
| 1                | 6                | 0              | 1.871939                | 1.215707  | 0.773426  |
| 2                | 8                | 0              | 1.635351                | 2.074063  | -0.156658 |
| 3                | 6                | 0              | 1.339150                | 1.347557  | 2.098840  |
| 4                | 6                | 0              | 2.684563                | 0.044108  | 0.534218  |
| 5                | 6                | 0              | 1.584743                | 0.401540  | 3.088222  |
| 6                | 6                | 0              | 2.896736                | -0.907533 | 1.539831  |
| 7                | 6                | 0              | 2.350216                | -0.751367 | 2.816648  |
| 8                | 1                | 0              | 0.748889                | 2.234298  | 2.316840  |
| 9                | 6                | 0              | 3.279162                | -0.048046 | -0.821480 |
| 10               | 1                | 0              | -0.139782               | 0.563286  | -1.621908 |
| 11               | 1                | 0              | 1.176132                | 0.555764  | 4.085443  |
| 12               | 1                | 0              | 3.518141                | -1.773138 | 1.325072  |
| 13               | 1                | 0              | 2.556660                | -1.478632 | 3.596586  |
| 14               | 17               | 0              | 2.108351                | -0.869490 | -2.060877 |
| 15               | 17               | 0              | 4.854014                | -0.903990 | -0.914407 |
| 16               | 8                | 0              | -0.923907               | 1.131421  | -1.725212 |
| 17               | 1                | 0              | -1.987692               | 1.567262  | -0.373965 |
| 18               | 1                | 0              | -1.683815               | 0.505537  | -2.091363 |
| 19               | 1                | 0              | 3.406584                | 0.936241  | -1.261636 |
| 20               | 8                | 0              | -1.658235               | 4.341428  | -0.435485 |
| 21               | 1                | 0              | -1.908383               | 5.183033  | -0.029883 |
| 22               | 1                | 0              | -2.250369               | 3.639686  | -0.063423 |
| 23               | 8                | 0              | -2.720005               | 1.925772  | 0.191180  |
| 24               | 1                | 0              | -2.585065               | 1.514004  | 1.075369  |
| 25               | 11               | 0              | -0.227822               | -1.133479 | 1.698489  |
| 26               | 11               | 0              | 0.080674                | 3.115677  | -1.202261 |
| 27               | 1                | 0              | -3.239538               | -0.276264 | -3.166573 |
| 28               | 8                | 0              | -2.858958               | -0.400071 | -2.285280 |
| 29               | 1                | 0              | -2.552623               | -1.865047 | -2.016055 |
| 30               | 8                | 0              | -2.380563               | -2.811265 | -1.609486 |
| 31               | 1                | 0              | -2.378467               | -3.453194 | -2.334975 |
| 32               | 17               | 0              | -2.677417               | -0.436786 | 2.213466  |
| 33               | 1                | 0              | -0.918200               | -2.681178 | -0.636699 |
| 34               | 8                | 0              | -0.124608               | -2.486986 | -0.074655 |
| 35               | 1                | 0              | 0.612273                | -2.347549 | -0.693061 |
| 36               | 1                | 0              | -3.837087               | -2.752353 | -0.440742 |
| 37               | 8                | 0              | -4.520838               | -2.316987 | 0.118019  |
| 38               | 1                | 0              | -4.184479               | -2.371860 | 1.029643  |
| 39               | 11               | 0              | -3.927603               | -0.127306 | -0.323990 |

SCF Done: E(RB3LYP) = -2747.24039844 A. U. after 1 cycles  
Zero-point correction= 0.269310 (Hartree/Particle)  
Thermal correction to Energy= 0.302992

Thermal correction to Enthalpy= 0.303936  
Thermal correction to Gibbs Free Energy= 0.201138  
Sum of electronic and zero-point Energies= -2746.971088  
Sum of electronic and thermal Energies= -2746.937407  
Sum of electronic and thermal Enthalpies= -2746.936463  
Sum of electronic and thermal Free Energies= -2747.039261

TS5 in Figure 1

Stoichiometry C7H18CL3NA3O8 %chk=reimer.na.ts5.chk  
Standard orientation:

| Center<br>Number | Atomic<br>Number | Atomic<br>Type | Coordinates (Angstroms) |           |           |
|------------------|------------------|----------------|-------------------------|-----------|-----------|
|                  |                  |                | X                       | Y         | Z         |
| 1                | 6                | 0              | 2.100536                | 1.302349  | 0.785113  |
| 2                | 8                | 0              | 2.018412                | 2.157157  | -0.143004 |
| 3                | 6                | 0              | 1.454112                | 1.502493  | 2.064128  |
| 4                | 6                | 0              | 2.830355                | 0.036486  | 0.622275  |
| 5                | 6                | 0              | 1.492702                | 0.547475  | 3.050272  |
| 6                | 6                | 0              | 2.830582                | -0.932263 | 1.672337  |
| 7                | 6                | 0              | 2.178791                | -0.694270 | 2.860927  |
| 8                | 1                | 0              | 0.923523                | 2.439233  | 2.209153  |
| 9                | 6                | 0              | 3.473324                | -0.152603 | -0.605003 |
| 10               | 1                | 0              | -0.210377               | 0.328976  | -1.848063 |
| 11               | 1                | 0              | 0.981636                | 0.730464  | 3.992580  |
| 12               | 1                | 0              | 3.369316                | -1.863171 | 1.520965  |
| 13               | 1                | 0              | 2.213021                | -1.422829 | 3.666155  |
| 14               | 17               | 0              | 1.681994                | -0.777165 | -2.246646 |
| 15               | 17               | 0              | 4.606085                | -1.426233 | -0.867729 |
| 16               | 8                | 0              | -0.923283               | 0.996146  | -1.724638 |
| 17               | 1                | 0              | -1.782743               | 1.581311  | -0.305724 |
| 18               | 1                | 0              | -1.803251               | 0.521829  | -2.026177 |
| 19               | 1                | 0              | 3.591741                | 0.680384  | -1.281391 |
| 20               | 8                | 0              | -1.119871               | 4.251860  | -0.659745 |
| 21               | 1                | 0              | -1.236974               | 5.151378  | -0.324292 |
| 22               | 1                | 0              | -1.749326               | 3.666063  | -0.169996 |
| 23               | 8                | 0              | -2.409933               | 2.051143  | 0.303453  |
| 24               | 1                | 0              | -2.239924               | 1.661160  | 1.189095  |
| 25               | 11               | 0              | -0.248001               | -1.320337 | 1.401000  |
| 26               | 11               | 0              | 0.412238                | 2.797097  | -1.499324 |
| 27               | 1                | 0              | -3.558312               | -0.026909 | -2.965097 |
| 28               | 8                | 0              | -3.130373               | -0.206854 | -2.116087 |
| 29               | 1                | 0              | -2.924244               | -1.699057 | -1.902106 |
| 30               | 8                | 0              | -2.792549               | -2.666063 | -1.529533 |
| 31               | 1                | 0              | -2.957000               | -3.286233 | -2.255471 |
| 32               | 17               | 0              | -2.419035               | -0.312678 | 2.355301  |
| 33               | 1                | 0              | -1.138664               | -2.712781 | -0.857989 |
| 34               | 8                | 0              | -0.265170               | -2.594368 | -0.407591 |
| 35               | 1                | 0              | 0.354664                | -2.277640 | -1.097857 |
| 36               | 1                | 0              | -4.077259               | -2.462023 | -0.200725 |
| 37               | 8                | 0              | -4.644259               | -1.972314 | 0.439899  |
| 38               | 1                | 0              | -4.217799               | -2.084966 | 1.306906  |
| 39               | 11               | 0              | -3.922234               | 0.164733  | -0.060589 |

---

SCF Done: E(RB3LYP) = -2747.23466823 A. U. after 1 cycles  
Zero-point correction= 0.268875 (Hartree/Particle)  
Thermal correction to Energy= 0.302159  
Thermal correction to Enthalpy= 0.303103  
Thermal correction to Gibbs Free Energy= 0.200442  
Sum of electronic and zero-point Energies= -2746.965793  
Sum of electronic and thermal Energies= -2746.932509  
Sum of electronic and thermal Enthalpies= -2746.931565  
Sum of electronic and thermal Free Energies= -2747.034226

Int6 in Figure 1

Stoichiometry C7H18CL3NA3O8 %chk=reimer.na.int6.chk

Standard orientation:

---

| Center<br>Number | Atomic<br>Number | Atomic<br>Type | Coordinates (Angstroms) |           |           |
|------------------|------------------|----------------|-------------------------|-----------|-----------|
|                  |                  |                | X                       | Y         | Z         |
| 1                | 6                | 0              | 4.100898                | -1.076154 | 0.281371  |
| 2                | 8                | 0              | 2.892923                | -1.335551 | 0.131374  |
| 3                | 6                | 0              | 5.057501                | -2.116184 | 0.631580  |
| 4                | 6                | 0              | 4.655831                | 0.307427  | 0.113297  |
| 5                | 6                | 0              | 6.381215                | -1.837760 | 0.784045  |
| 6                | 6                | 0              | 6.079006                | 0.522995  | 0.290024  |
| 7                | 6                | 0              | 6.907455                | -0.503650 | 0.611312  |
| 8                | 1                | 0              | 4.660954                | -3.118767 | 0.760049  |
| 9                | 6                | 0              | 3.770635                | 1.295733  | -0.195642 |
| 10               | 1                | 0              | -1.057308               | -0.090360 | 0.874349  |
| 11               | 1                | 0              | 7.071359                | -2.637737 | 1.043307  |
| 12               | 1                | 0              | 6.466977                | 1.528287  | 0.160852  |
| 13               | 1                | 0              | 7.971741                | -0.333066 | 0.742889  |
| 14               | 17               | 0              | 0.198984                | 1.272102  | -0.638131 |
| 15               | 17               | 0              | 4.204113                | 2.943878  | -0.429241 |
| 16               | 8                | 0              | -1.236480               | -1.040748 | 1.019427  |
| 17               | 1                | 0              | -2.137240               | -1.758853 | -0.302048 |
| 18               | 1                | 0              | -2.075118               | -1.087042 | 1.624011  |
| 19               | 1                | 0              | 2.702965                | 1.122557  | -0.318069 |
| 20               | 8                | 0              | -0.130694               | -3.067003 | -1.580917 |
| 21               | 1                | 0              | 0.111294                | -3.529922 | -2.394942 |
| 22               | 1                | 0              | -1.116735               | -2.985413 | -1.568141 |
| 23               | 8                | 0              | -2.664982               | -2.239200 | -0.995021 |
| 24               | 1                | 0              | -2.934107               | -1.540108 | -1.633762 |
| 25               | 11               | 0              | -2.310251               | 1.872173  | -1.096985 |
| 26               | 11               | 0              | 0.699137                | -1.397702 | -0.252145 |
| 27               | 1                | 0              | -3.571517               | -1.689477 | 2.959465  |
| 28               | 8                | 0              | -3.522635               | -1.120260 | 2.178238  |
| 29               | 1                | 0              | -4.088778               | 0.228430  | 2.451049  |
| 30               | 8                | 0              | -4.529108               | 1.186609  | 2.423757  |
| 31               | 1                | 0              | -4.782228               | 1.427708  | 3.327034  |
| 32               | 17               | 0              | -4.183202               | 0.314185  | -1.993598 |
| 33               | 1                | 0              | -3.450392               | 2.237058  | 1.538525  |
| 34               | 8                | 0              | -2.806031               | 2.712580  | 0.950475  |
| 35               | 1                | 0              | -2.024786               | 2.890791  | 1.495316  |

|    |    |   |           |           |           |
|----|----|---|-----------|-----------|-----------|
| 36 | 1  | 0 | -5.887645 | 0.666543  | 1.253174  |
| 37 | 8  | 0 | -6.325482 | 0.124599  | 0.557163  |
| 38 | 1  | 0 | -6.195203 | 0.617680  | -0.272595 |
| 39 | 11 | 0 | -4.619592 | -1.409358 | 0.233141  |

---

SCF Done: E(RB3LYP) = -2747.26147853 A.U. after 1 cycles  
Zero-point correction= 0.268613 (Hartree/Particle)  
Thermal correction to Energy= 0.303325  
Thermal correction to Enthalpy= 0.304269  
Thermal correction to Gibbs Free Energy= 0.196637  
Sum of electronic and zero-point Energies= -2746.992865  
Sum of electronic and thermal Energies= -2746.958153  
Sum of electronic and thermal Enthalpies= -2746.957209  
Sum of electronic and thermal Free Energies= -2747.064841

TS6 in Figure 1

Stoichiometry C7H18CL3NA3O8 %chk=reimer.na.ts6.chk

Standard orientation:

---

| Center<br>Number | Atomic<br>Number | Atomic<br>Type | Coordinates (Angstroms) |           |           |
|------------------|------------------|----------------|-------------------------|-----------|-----------|
|                  |                  |                | X                       | Y         | Z         |
| 1                | 6                | 0              | -2.054669               | 0.034383  | 1.488935  |
| 2                | 8                | 0              | -3.087329               | -0.008264 | 0.766160  |
| 3                | 6                | 0              | -2.137726               | 0.025087  | 2.931083  |
| 4                | 6                | 0              | -0.694227               | 0.012582  | 0.898246  |
| 5                | 6                | 0              | -1.023242               | -0.193498 | 3.692284  |
| 6                | 6                | 0              | 0.432165                | -0.274708 | 1.750983  |
| 7                | 6                | 0              | 0.274379                | -0.374706 | 3.102156  |
| 8                | 1                | 0              | -3.125587               | 0.120011  | 3.371855  |
| 9                | 6                | 0              | -0.602628               | 0.305337  | -0.438928 |
| 10               | 1                | 0              | -1.462548               | 0.623679  | -1.011962 |
| 11               | 1                | 0              | -1.117349               | -0.252805 | 4.774514  |
| 12               | 1                | 0              | 1.417942                | -0.374934 | 1.310276  |
| 13               | 1                | 0              | 1.130472                | -0.574233 | 3.739772  |
| 14               | 17               | 0              | -1.335746               | -3.406725 | -0.660338 |
| 15               | 17               | 0              | 0.767206                | -0.055966 | -1.429692 |
| 16               | 8                | 0              | -0.072422               | 2.742837  | -0.556280 |
| 17               | 11               | 0              | -3.207695               | -1.623193 | -0.869196 |
| 18               | 8                | 0              | -3.955857               | -0.109245 | -2.336204 |
| 19               | 1                | 0              | -4.294805               | -0.047317 | -3.239942 |
| 20               | 1                | 0              | -4.184335               | 0.753163  | -1.873527 |
| 21               | 1                | 0              | -4.216789               | 1.453870  | 0.040974  |
| 22               | 8                | 0              | -4.458908               | 1.971295  | -0.750299 |
| 23               | 1                | 0              | -3.802820               | 2.714338  | -0.755372 |
| 24               | 1                | 0              | -1.554715               | 3.481617  | -0.489111 |
| 25               | 8                | 0              | -2.481394               | 3.861540  | -0.591061 |
| 26               | 1                | 0              | -2.544645               | 4.616837  | 0.010206  |
| 27               | 1                | 0              | 1.013955                | 2.608749  | 0.092059  |
| 28               | 8                | 0              | 2.019684                | 2.404835  | 0.654082  |
| 29               | 1                | 0              | 1.826058                | 2.519505  | 1.596513  |
| 30               | 11               | 0              | 1.112707                | -2.872212 | -0.116006 |
| 31               | 17               | 0              | 3.480573                | -1.921699 | 0.365798  |



|    |    |   |          |           |           |
|----|----|---|----------|-----------|-----------|
| 32 | 1  | 0 | 0.188639 | 2.952580  | -1.468166 |
| 33 | 1  | 0 | 4.121428 | -1.115647 | -1.669428 |
| 34 | 8  | 0 | 4.108171 | -0.261313 | -2.155289 |
| 35 | 1  | 0 | 4.872702 | -0.257543 | -2.749367 |
| 36 | 1  | 0 | 3.560368 | 3.153678  | 0.247554  |
| 37 | 8  | 0 | 4.495455 | 2.947272  | -0.021205 |
| 38 | 1  | 0 | 4.878683 | 3.731970  | -0.435732 |
| 39 | 11 | 0 | 3.557286 | 0.843459  | -0.179068 |

---

SCF Done: E(RB3LYP) = -2747.20921913 A. U. after 1 cycles  
Zero-point correction= 0.262241 (a. u.)  
Thermal correction to Energy= 0.298085  
Thermal correction to Enthalpy= 0.299029  
Thermal correction to Gibbs Free Energy= 0.189230  
Sum of electronic and zero-point Energies= -2746.946978  
Sum of electronic and thermal Energies= -2746.911134  
Sum of electronic and thermal Enthalpies= -2746.910190  
Sum of electronic and thermal Free Energies= -2747.019989

Int7 in Figure 1

Stoichiometry C7H18CL3NA3O8 %chk=reimer.na.int7.chk  
Standard orientation:

---

| Center<br>Number | Atomic<br>Number | Atomic<br>Type | Coordinates (Angstroms) |           |           |
|------------------|------------------|----------------|-------------------------|-----------|-----------|
|                  |                  |                | X                       | Y         | Z         |
| 1                | 6                | 0              | -0.521382               | -0.256771 | 1.080615  |
| 2                | 8                | 0              | 0.420232                | 0.478855  | 0.517482  |
| 3                | 6                | 0              | -1.222317               | 0.191977  | 2.231484  |
| 4                | 6                | 0              | -0.877477               | -1.541752 | 0.550543  |
| 5                | 6                | 0              | -2.178016               | -0.608081 | 2.859838  |
| 6                | 6                | 0              | -1.824258               | -2.332505 | 1.210108  |
| 7                | 6                | 0              | -2.478576               | -1.880552 | 2.359913  |
| 8                | 1                | 0              | -0.969785               | 1.172183  | 2.628948  |
| 9                | 6                | 0              | -0.164013               | -1.932124 | -0.724854 |
| 10               | 8                | 0              | 1.158146                | -2.260638 | -0.514977 |
| 11               | 1                | 0              | -2.685149               | -0.237042 | 3.747666  |
| 12               | 1                | 0              | -2.062894               | -3.312414 | 0.809182  |
| 13               | 1                | 0              | -3.211637               | -2.511811 | 2.853173  |
| 14               | 1                | 0              | 1.687457                | -1.972859 | -1.317948 |
| 15               | 1                | 0              | -0.250217               | -1.148703 | -1.478043 |
| 16               | 17               | 0              | -1.060808               | -3.346073 | -1.611896 |
| 17               | 11               | 0              | 2.332811                | -0.710328 | 0.908136  |
| 18               | 8                | 0              | 0.686208                | 1.176535  | -2.075581 |
| 19               | 1                | 0              | 0.458335                | 0.755786  | -1.206619 |
| 20               | 1                | 0              | -0.135492               | 1.599082  | -2.383238 |
| 21               | 8                | 0              | 2.538423                | -0.949208 | -2.408078 |
| 22               | 1                | 0              | 1.971801                | -0.173141 | -2.605043 |
| 23               | 1                | 0              | 3.322014                | -0.564746 | -1.959194 |
| 24               | 8                | 0              | 4.028908                | -1.184506 | 2.384117  |
| 25               | 1                | 0              | 4.522463                | -1.940239 | 2.733777  |
| 26               | 1                | 0              | 4.641607                | -0.685168 | 1.800359  |
| 27               | 17               | 0              | 4.426384                | 0.558173  | -0.173197 |

|    |    |   |           |           |           |
|----|----|---|-----------|-----------|-----------|
| 28 | 1  | 0 | 3.448159  | 2.433466  | 0.183798  |
| 29 | 8  | 0 | 2.854555  | 3.211019  | 0.354834  |
| 30 | 1  | 0 | 3.430216  | 3.988896  | 0.341327  |
| 31 | 11 | 0 | 0.711756  | 2.690839  | -0.046420 |
| 32 | 1  | 0 | -5.441823 | 2.641046  | 0.453151  |
| 33 | 8  | 0 | -4.525187 | 2.339295  | 0.525421  |
| 34 | 1  | 0 | -3.955925 | 3.029307  | 0.121746  |
| 35 | 11 | 0 | -2.975107 | 0.724863  | 0.029120  |
| 36 | 8  | 0 | -3.369697 | -0.822551 | -1.629973 |
| 37 | 1  | 0 | -2.914215 | -1.685033 | -1.682188 |
| 38 | 1  | 0 | -3.642036 | -0.612879 | -2.536315 |
| 39 | 17 | 0 | -1.819305 | 3.006346  | -0.858176 |

---

SCF Done: E(RB3LYP) = -2747.28337253 A. U. after 2 cycles  
Zero-point correction= 0.269811 (Hartree/Particle)  
Thermal correction to Energy= 0.305606  
Thermal correction to Enthalpy= 0.306550  
Thermal correction to Gibbs Free Energy= 0.198484  
Sum of electronic and zero-point Energies= -2747.013562  
Sum of electronic and thermal Energies= -2746.977767  
Sum of electronic and thermal Enthalpies= -2746.976823  
Sum of electronic and thermal Free Energies= -2747.084889

TS7 in Figure 1

Stoichiometry C7H18CL3NA3O8 %chk=reimer.na.ts7.chk  
Standard orientation:

---

| Center<br>Number | Atomic<br>Number | Atomic<br>Type | Coordinates (Angstroms) |           |           |
|------------------|------------------|----------------|-------------------------|-----------|-----------|
|                  |                  |                | X                       | Y         | Z         |
| 1                | 6                | 0              | 0.382860                | 1.476518  | 0.108005  |
| 2                | 8                | 0              | 0.554227                | 2.333818  | -0.931595 |
| 3                | 6                | 0              | 0.344011                | 2.006987  | 1.412259  |
| 4                | 6                | 0              | 0.202731                | 0.078222  | -0.071627 |
| 5                | 6                | 0              | 0.159277                | 1.175395  | 2.519564  |
| 6                | 6                | 0              | 0.047377                | -0.737886 | 1.055810  |
| 7                | 6                | 0              | 0.013263                | -0.202483 | 2.343802  |
| 8                | 1                | 0              | 0.530096                | 3.071068  | 1.535058  |
| 9                | 6                | 0              | 0.344650                | -0.438623 | -1.490324 |
| 10               | 8                | 0              | 1.627860                | -0.668717 | -1.868214 |
| 11               | 1                | 0              | 0.177575                | 1.600752  | 3.519588  |
| 12               | 1                | 0              | -0.038820               | -1.812269 | 0.920767  |
| 13               | 1                | 0              | -0.089661               | -0.858928 | 3.202276  |
| 14               | 1                | 0              | 1.980649                | 0.290578  | -2.327838 |
| 15               | 1                | 0              | -0.178866               | 0.216817  | -2.193199 |
| 16               | 17               | 0              | -0.646871               | -2.068350 | -1.722328 |
| 17               | 11               | 0              | 3.436791                | -1.125071 | -0.464955 |
| 18               | 8                | 0              | 2.294005                | 1.577731  | -2.482792 |
| 19               | 1                | 0              | 1.348988                | 2.053127  | -1.672829 |
| 20               | 1                | 0              | 2.243939                | 1.914610  | -3.389498 |
| 21               | 1                | 0              | 3.981265                | 1.230399  | -1.721969 |
| 22               | 8                | 0              | 4.657724                | 0.648313  | -1.310252 |
| 23               | 1                | 0              | 4.785857                | 0.970008  | -0.396020 |

|    |    |   |           |           |           |
|----|----|---|-----------|-----------|-----------|
| 24 | 8  | 0 | 3.766237  | -2.889268 | 1.015841  |
| 25 | 1  | 0 | 4.491168  | -3.516147 | 1.152528  |
| 26 | 1  | 0 | 3.943438  | -2.123116 | 1.625137  |
| 27 | 17 | 0 | 4.032357  | 0.028198  | 1.876533  |
| 28 | 1  | 0 | -0.760424 | 3.476685  | -0.901054 |
| 29 | 8  | 0 | -1.643813 | 3.808659  | -0.587920 |
| 30 | 1  | 0 | -1.915257 | 4.530997  | -1.170453 |
| 31 | 11 | 0 | -2.338690 | 2.215359  | 0.818601  |
| 32 | 1  | 0 | -3.263315 | -3.083854 | 2.385783  |
| 33 | 8  | 0 | -3.505083 | -2.526986 | 1.631907  |
| 34 | 1  | 0 | -3.854256 | -1.684927 | 1.986851  |
| 35 | 11 | 0 | -3.050602 | -1.708162 | -0.433750 |
| 36 | 8  | 0 | -4.796971 | -1.149071 | -1.773648 |
| 37 | 1  | 0 | -5.487278 | -1.375060 | -2.413372 |
| 38 | 1  | 0 | -5.145297 | -0.440245 | -1.196225 |
| 39 | 17 | 0 | -4.201416 | 0.458475  | 0.853093  |

---

SCF Done: E(RB3LYP) = -2747.23579979 A. U. after 2 cycles  
Zero-point correction= 0.262033 (Hartree/Particle)  
Thermal correction to Energy= 0.297472  
Thermal correction to Enthalpy= 0.298416  
Thermal correction to Gibbs Free Energy= 0.187066  
Sum of electronic and zero-point Energies= -2746.973767  
Sum of electronic and thermal Energies= -2746.938328  
Sum of electronic and thermal Enthalpies= -2746.937383  
Sum of electronic and thermal Free Energies= -2747.048734

product in Figure 1

Stoichiometry C7H18CL3NA3O8 %chk=reimer.na.pro.chk  
Standard orientation:

---

| Center<br>Number | Atomic<br>Number | Atomic<br>Type | Coordinates (Angstroms) |           |           |
|------------------|------------------|----------------|-------------------------|-----------|-----------|
|                  |                  |                | X                       | Y         | Z         |
| 1                | 6                | 0              | -3.561276               | 0.735681  | 0.521046  |
| 2                | 8                | 0              | -2.464059               | 1.458386  | 0.890545  |
| 3                | 6                | 0              | -4.819505               | 1.289657  | 0.790537  |
| 4                | 6                | 0              | -3.475611               | -0.515605 | -0.137834 |
| 5                | 6                | 0              | -5.975920               | 0.597848  | 0.441705  |
| 6                | 6                | 0              | -4.661813               | -1.207613 | -0.462020 |
| 7                | 6                | 0              | -5.904170               | -0.662082 | -0.176354 |
| 8                | 1                | 0              | -4.865721               | 2.251533  | 1.291853  |
| 9                | 6                | 0              | -2.177676               | -1.057804 | -0.532416 |
| 10               | 8                | 0              | -1.996880               | -2.190646 | -0.989996 |
| 11               | 1                | 0              | -6.945502               | 1.036562  | 0.663582  |
| 12               | 1                | 0              | -4.569754               | -2.169651 | -0.957758 |
| 13               | 1                | 0              | -6.812951               | -1.196930 | -0.436162 |
| 14               | 1                | 0              | -0.239468               | -0.756970 | 1.845588  |
| 15               | 1                | 0              | -1.315184               | -0.381088 | -0.434607 |
| 16               | 17               | 0              | 1.234912                | -0.180116 | -1.652716 |
| 17               | 11               | 0              | 0.284454                | -2.610149 | -1.029741 |
| 18               | 8                | 0              | -0.462168               | 0.182311  | 2.035960  |
| 19               | 1                | 0              | -1.718731               | 0.908255  | 1.296346  |

|    |    |   |           |           |           |
|----|----|---|-----------|-----------|-----------|
| 20 | 1  | 0 | 0.393723  | 0.664055  | 1.967226  |
| 21 | 1  | 0 | -0.048432 | -3.157202 | 1.926704  |
| 22 | 8  | 0 | 0.317300  | -2.458959 | 1.360924  |
| 23 | 1  | 0 | 1.309513  | -2.508020 | 1.484623  |
| 24 | 8  | 0 | 1.943139  | -4.155864 | -1.103467 |
| 25 | 1  | 0 | 2.492969  | -4.544374 | -1.798912 |
| 26 | 1  | 0 | 2.569088  | -3.815693 | -0.415463 |
| 27 | 17 | 0 | 3.350112  | -2.586376 | 1.205585  |
| 28 | 1  | 0 | -1.696313 | 2.707111  | -0.201217 |
| 29 | 8  | 0 | -1.131783 | 3.268830  | -0.778574 |
| 30 | 1  | 0 | -0.927718 | 4.061876  | -0.257813 |
| 31 | 11 | 0 | 0.816627  | 2.386931  | -1.544472 |
| 32 | 1  | 0 | 5.509512  | 1.703585  | -0.750860 |
| 33 | 8  | 0 | 4.666634  | 1.535138  | -0.306657 |
| 34 | 1  | 0 | 4.164309  | 2.385235  | -0.313619 |
| 35 | 11 | 0 | 3.234360  | -0.151544 | 0.213267  |
| 36 | 8  | 0 | 2.120308  | 1.299446  | 1.777028  |
| 37 | 1  | 0 | 2.549846  | 1.417602  | 2.639258  |
| 38 | 1  | 0 | 2.187980  | 2.183090  | 1.320416  |
| 39 | 17 | 0 | 2.461380  | 3.751419  | -0.061862 |

---

SCF Done: E(RB3LYP) = -2747.34188870 A.U. after 1 cycles  
Zero-point correction= 0.270371 (Hartree/Particle)  
Thermal correction to Energy= 0.305578  
Thermal correction to Enthalpy= 0.306522  
Thermal correction to Gibbs Free Energy= 0.199995  
Sum of electronic and zero-point Energies= -2747.071518  
Sum of electronic and thermal Energies= -2747.036311  
Sum of electronic and thermal Enthalpies= -2747.035367  
Sum of electronic and thermal Free Energies= -2747.141894

TS8 in Figure 1

Stoichiometry C7H18CL3NA3O8 %chk=reimer.na.ts8.chk

Standard orientation:

---

| Center<br>Number | Atomic<br>Number | Atomic<br>Type | Coordinates (Angstroms) |           |           |
|------------------|------------------|----------------|-------------------------|-----------|-----------|
|                  |                  |                | X                       | Y         | Z         |
| 1                | 6                | 0              | -1.716615               | -1.464193 | 0.628490  |
| 2                | 8                | 0              | -0.871720               | -1.109647 | 1.444392  |
| 3                | 6                | 0              | -1.613488               | -2.725440 | -0.106866 |
| 4                | 6                | 0              | -3.012434               | -0.630957 | 0.407743  |
| 5                | 6                | 0              | -2.671530               | -3.213065 | -0.792651 |
| 6                | 6                | 0              | -4.104529               | -1.264867 | -0.347129 |
| 7                | 6                | 0              | -3.924879               | -2.478944 | -0.909575 |
| 8                | 1                | 0              | -0.666310               | -3.249198 | -0.015789 |
| 9                | 6                | 0              | -2.905487               | 0.728974  | 0.798192  |
| 10               | 1                | 0              | -3.223763               | -0.271628 | 1.635902  |
| 11               | 1                | 0              | -2.595204               | -4.176871 | -1.289371 |
| 12               | 1                | 0              | -5.028951               | -0.712926 | -0.474160 |
| 13               | 1                | 0              | -4.725638               | -2.921405 | -1.496643 |
| 14               | 17               | 0              | 2.572320                | 3.448906  | -0.879017 |
| 15               | 17               | 0              | -4.329980               | 1.710688  | 0.440527  |

|    |    |   |           |           |           |
|----|----|---|-----------|-----------|-----------|
| 16 | 17 | 0 | -0.487888 | -0.110367 | -2.012287 |
| 17 | 11 | 0 | 1.855946  | -1.175371 | -1.399235 |
| 18 | 11 | 0 | 0.255914  | 2.165955  | -0.958253 |
| 19 | 1  | 0 | 0.883908  | 4.385555  | 0.006176  |
| 20 | 8  | 0 | -0.077234 | 4.371935  | 0.266284  |
| 21 | 1  | 0 | -0.401963 | 5.281952  | 0.197715  |
| 22 | 8  | 0 | 2.571099  | 0.469490  | 0.097522  |
| 23 | 1  | 0 | 3.428930  | 0.016481  | 0.396916  |
| 24 | 1  | 0 | 2.789657  | 1.393370  | -0.176325 |
| 25 | 1  | 0 | -1.258477 | 1.540039  | 1.333396  |
| 26 | 8  | 0 | -0.314477 | 1.863170  | 1.400056  |
| 27 | 1  | 0 | -0.344913 | 2.841293  | 1.426686  |
| 28 | 11 | 0 | 1.085373  | 0.103637  | 1.813500  |
| 29 | 8  | 0 | 4.397020  | -1.183415 | 0.913515  |
| 30 | 1  | 0 | 5.275401  | -0.921744 | 1.223546  |
| 31 | 1  | 0 | 3.378051  | -1.481977 | 1.946920  |
| 32 | 8  | 0 | 2.464864  | -1.630691 | 2.455521  |
| 33 | 1  | 0 | 2.655155  | -2.107314 | 3.276306  |
| 34 | 1  | 0 | 4.274000  | -1.928062 | -0.467872 |
| 35 | 8  | 0 | 3.888873  | -2.349942 | -1.323005 |
| 36 | 1  | 0 | 4.631850  | -2.556372 | -1.907461 |
| 37 | 8  | 0 | 1.610047  | -3.016332 | 0.136677  |
| 38 | 1  | 0 | 2.465439  | -3.333543 | -0.211389 |
| 39 | 1  | 0 | 1.813601  | -2.696552 | 1.045601  |

-----  
SCF Done: E(RB3LYP) = -2747.13248383 A. U. after 1 cycles  
Zero-point correction= 0.262124 (Hartree/Particle)  
Thermal correction to Energy= 0.296007  
Thermal correction to Enthalpy= 0.296952  
Thermal correction to Gibbs Free Energy= 0.195062  
Sum of electronic and zero-point Energies= -2746.870360  
Sum of electronic and thermal Energies= -2746.836477  
Sum of electronic and thermal Enthalpies= -2746.835532  
Sum of electronic and thermal Free Energies= -2746.937422

TS9 in Figure 1

Stoichiometry C7H18CL3NA3O8 %chk=reimer.na.ts9.chk  
Standard orientation:

-----

| Center<br>Number | Atomic<br>Number | Atomic<br>Type | Coordinates (Angstroms) |          |           |
|------------------|------------------|----------------|-------------------------|----------|-----------|
|                  |                  |                | X                       | Y        | Z         |
| 1                | 6                | 0              | -1.429858               | 1.773262 | -0.202734 |
| 2                | 8                | 0              | -1.758246               | 0.526877 | 0.027993  |
| 3                | 6                | 0              | -1.147062               | 2.676743 | 0.872302  |
| 4                | 6                | 0              | -1.261155               | 2.277026 | -1.526400 |
| 5                | 6                | 0              | -0.742183               | 3.997478 | 0.627602  |
| 6                | 6                | 0              | -0.842307               | 3.580193 | -1.748751 |
| 7                | 6                | 0              | -0.571145               | 4.454631 | -0.674800 |
| 8                | 1                | 0              | -1.343680               | 2.336960 | 1.886092  |
| 9                | 6                | 0              | 1.137243                | 1.121680 | 1.087284  |
| 10               | 1                | 0              | -1.436244               | 1.602724 | -2.362519 |
| 11               | 1                | 0              | -0.555413               | 4.661629 | 1.468591  |

|    |    |   |           |           |           |
|----|----|---|-----------|-----------|-----------|
| 12 | 1  | 0 | -0.711112 | 3.931132  | -2.770130 |
| 13 | 1  | 0 | -0.243872 | 5.472208  | -0.867246 |
| 14 | 17 | 0 | 1.380374  | -1.651547 | 0.860930  |
| 15 | 17 | 0 | 1.532881  | 1.343245  | 2.715412  |
| 16 | 17 | 0 | 2.181072  | 1.621619  | -0.107651 |
| 17 | 1  | 0 | 0.208980  | 0.633134  | 0.833792  |
| 18 | 11 | 0 | -1.281653 | -1.627208 | 0.698963  |
| 19 | 11 | 0 | 3.655470  | -1.792939 | -0.554376 |
| 20 | 8  | 0 | -3.218579 | -2.474347 | -0.430669 |
| 21 | 1  | 0 | -2.947704 | -3.131279 | -1.089478 |
| 22 | 8  | 0 | 5.801706  | -1.117329 | -0.600920 |
| 23 | 1  | 0 | 6.557245  | -0.812078 | -0.083346 |
| 24 | 1  | 0 | -3.036929 | -3.015366 | 1.176781  |
| 25 | 8  | 0 | -2.640029 | -2.891627 | 2.088713  |
| 26 | 1  | 0 | -2.523900 | -3.762674 | 2.493223  |
| 27 | 1  | 0 | -4.852301 | -2.698004 | -0.446049 |
| 28 | 8  | 0 | -5.863396 | -2.658775 | -0.527037 |
| 29 | 1  | 0 | -6.225042 | -2.927010 | 0.330515  |
| 30 | 1  | 0 | 5.663638  | -2.643091 | -1.106151 |
| 31 | 8  | 0 | 5.079161  | -3.448658 | -1.330121 |
| 32 | 1  | 0 | 5.408151  | -3.834718 | -2.152766 |
| 33 | 1  | 0 | 4.960220  | -0.131865 | -1.415754 |
| 34 | 8  | 0 | 4.088543  | 0.224815  | -1.855737 |
| 35 | 1  | 0 | 4.268115  | 0.300960  | -2.803757 |
| 36 | 1  | 0 | -6.494461 | 0.267700  | -1.866600 |
| 37 | 8  | 0 | -5.797758 | -0.121709 | -1.321132 |
| 38 | 1  | 0 | -6.080487 | -1.044455 | -1.069496 |
| 39 | 11 | 0 | -3.611196 | -0.319157 | -0.884515 |

---

SCF Done: E(RB3LYP) = -2747.10382284 A. U. after 1 cycles  
Zero-point correction= 0.261809 (Hartree/Particle)  
Thermal correction to Energy= 0.297422  
Thermal correction to Enthalpy= 0.298366  
Thermal correction to Gibbs Free Energy= 0.185365  
Sum of electronic and zero-point Energies= -2746.842014  
Sum of electronic and thermal Energies= -2746.806401  
Sum of electronic and thermal Enthalpies= -2746.805456  
Sum of electronic and thermal Free Energies= -2746.918458

Results of IRC calculations starting from the B3LYP/6-31+G(d) TS geomerty.

Int2 (Na<sup>+</sup>)

Stoichiometry C7H18Cl3Na3O8

Standard orientation:

---

| Center<br>Number | Atomic<br>Number | Atomic<br>Type | Coordinates (Angstroms) |          |           |
|------------------|------------------|----------------|-------------------------|----------|-----------|
|                  |                  |                | X                       | Y        | Z         |
| 1                | 6                | 0              | 1.135544                | 1.058619 | -0.737511 |
| 2                | 8                | 0              | -0.107196               | 0.788855 | -0.406763 |
| 3                | 6                | 0              | 1.566074                | 1.121794 | -2.093539 |
| 4                | 6                | 0              | 2.130717                | 1.308086 | 0.259833  |

---

|    |    |   |           |           |           |
|----|----|---|-----------|-----------|-----------|
| 5  | 6  | 0 | 2.878756  | 1.435502  | -2.419693 |
| 6  | 6  | 0 | 3.445809  | 1.655021  | -0.086944 |
| 7  | 6  | 0 | 3.835086  | 1.711568  | -1.422597 |
| 8  | 1  | 0 | 0.842028  | 0.909791  | -2.876903 |
| 9  | 6  | 0 | 2.531659  | -1.530020 | 0.608639  |
| 10 | 1  | 0 | 1.832508  | 1.264483  | 1.305419  |
| 11 | 1  | 0 | 3.171702  | 1.469398  | -3.467016 |
| 12 | 1  | 0 | 4.169753  | 1.850305  | 0.701702  |
| 13 | 1  | 0 | 4.856340  | 1.963197  | -1.693564 |
| 14 | 17 | 0 | 3.543782  | -1.889921 | -0.742207 |
| 15 | 17 | 0 | 3.476307  | -1.480908 | 2.087489  |
| 16 | 17 | 0 | -1.403662 | -2.433271 | -1.549830 |
| 17 | 11 | 0 | -1.229238 | 2.302152  | 0.910726  |
| 18 | 11 | 0 | -0.035344 | -1.414685 | 0.452904  |
| 19 | 8  | 0 | -1.349677 | -1.724692 | 2.317701  |
| 20 | 1  | 0 | -1.553049 | -2.632855 | 2.586074  |
| 21 | 1  | 0 | -2.242666 | -1.271687 | 2.179839  |
| 22 | 8  | 0 | -1.772469 | 1.445169  | 2.942103  |
| 23 | 1  | 0 | -2.483223 | 0.793333  | 2.651023  |
| 24 | 1  | 0 | -1.185454 | 0.930499  | 3.515601  |
| 25 | 1  | 0 | 1.172628  | 3.540539  | 0.312910  |
| 26 | 8  | 0 | 0.342866  | 3.957542  | 0.612678  |
| 27 | 1  | 0 | 0.583880  | 4.822748  | 0.974955  |
| 28 | 11 | 0 | -1.993312 | 0.137841  | -1.577869 |
| 29 | 8  | 0 | -3.507634 | -0.266007 | 1.834959  |
| 30 | 1  | 0 | -4.286062 | -0.313147 | 2.410833  |
| 31 | 1  | 0 | -3.475586 | 0.888429  | 0.722779  |
| 32 | 8  | 0 | -3.182167 | 1.557516  | 0.010838  |
| 33 | 1  | 0 | -3.926165 | 1.643800  | -0.609665 |
| 34 | 1  | 0 | -4.067769 | -1.251402 | 0.459025  |
| 35 | 8  | 0 | -4.331901 | -1.668655 | -0.405041 |
| 36 | 1  | 0 | -3.560656 | -2.211098 | -0.678495 |
| 37 | 8  | 0 | -4.268518 | 0.265403  | -2.236693 |
| 38 | 1  | 0 | -4.462324 | -0.499820 | -1.613727 |
| 39 | 1  | 0 | -4.756641 | 0.090350  | -3.054237 |

---

SCF Done: E(RB3LYP) = -2747.15230193 A.U. after 1 cycles  
Zero-point correction= 0.265451 (Hartree/Particle)  
Thermal correction to Energy= 0.300841  
Thermal correction to Enthalpy= 0.301785  
Thermal correction to Gibbs Free Energy= 0.194597  
Sum of electronic and zero-point Energies= -2746.886851  
Sum of electronic and thermal Energies= -2746.851461  
Sum of electronic and thermal Enthalpies= -2746.850517  
Sum of electronic and thermal Free Energies= -2746.957705

TS2 (Na<sup>+</sup>)

Stoichiometry C7H18Cl3Na3O8

Standard orientation:

---

| Center<br>Number | Atomic<br>Number | Atomic<br>Type | Coordinates (Angstroms) |   |   |
|------------------|------------------|----------------|-------------------------|---|---|
|                  |                  |                | X                       | Y | Z |

---

|    |    |   |           |           |           |
|----|----|---|-----------|-----------|-----------|
| 1  | 6  | 0 | 1.197500  | -1.034176 | 0.453262  |
| 2  | 8  | 0 | -0.057557 | -0.725192 | 0.326949  |
| 3  | 6  | 0 | 1.714937  | -1.680354 | 1.611074  |
| 4  | 6  | 0 | 2.144531  | -0.697689 | -0.593966 |
| 5  | 6  | 0 | 3.057834  | -2.024380 | 1.696654  |
| 6  | 6  | 0 | 3.485699  | -1.174117 | -0.516109 |
| 7  | 6  | 0 | 3.956617  | -1.780087 | 0.630815  |
| 8  | 1  | 0 | 1.039062  | -1.886942 | 2.438139  |
| 9  | 6  | 0 | 2.281129  | 1.372603  | -0.245160 |
| 10 | 1  | 0 | 1.730224  | -0.481637 | -1.574800 |
| 11 | 1  | 0 | 3.424800  | -2.500409 | 2.603517  |
| 12 | 1  | 0 | 4.153464  | -0.981713 | -1.351221 |
| 13 | 1  | 0 | 4.998120  | -2.073892 | 0.719062  |
| 14 | 17 | 0 | 3.148893  | 1.611575  | 1.289841  |
| 15 | 17 | 0 | 3.327156  | 1.957221  | -1.596141 |
| 16 | 17 | 0 | -1.756865 | 3.588677  | 0.346415  |
| 17 | 11 | 0 | -1.064922 | -2.244218 | -1.177895 |
| 18 | 11 | 0 | -0.249786 | 1.608349  | -0.426524 |
| 19 | 8  | 0 | -1.868797 | 1.507425  | -2.138731 |
| 20 | 1  | 0 | -2.101129 | 2.419084  | -1.870113 |
| 21 | 1  | 0 | -2.654194 | 0.963055  | -1.874034 |
| 22 | 8  | 0 | -2.029485 | -1.397439 | -3.036326 |
| 23 | 1  | 0 | -2.814497 | -1.003197 | -2.549814 |
| 24 | 1  | 0 | -1.654544 | -0.644118 | -3.520382 |
| 25 | 1  | 0 | 1.130527  | -3.621992 | -0.033782 |
| 26 | 8  | 0 | 0.447555  | -3.909390 | -0.666528 |
| 27 | 1  | 0 | 0.781158  | -4.720914 | -1.077717 |
| 28 | 11 | 0 | -1.934199 | -0.731517 | 1.655556  |
| 29 | 8  | 0 | -3.787892 | -0.308545 | -1.327934 |
| 30 | 1  | 0 | -4.704701 | -0.264484 | -1.638580 |
| 31 | 1  | 0 | -3.465767 | -1.450429 | -0.463340 |
| 32 | 8  | 0 | -2.959602 | -2.165998 | 0.136520  |
| 33 | 1  | 0 | -3.597207 | -2.858419 | 0.361974  |
| 34 | 1  | 0 | -3.660206 | 0.684061  | 0.160628  |
| 35 | 8  | 0 | -3.304444 | 1.015286  | 1.027587  |
| 36 | 1  | 0 | -2.942425 | 1.927390  | 0.857695  |
| 37 | 8  | 0 | -3.228471 | -0.121081 | 3.453722  |
| 38 | 1  | 0 | -3.587083 | 0.534811  | 2.811310  |
| 39 | 1  | 0 | -3.283712 | 0.272603  | 4.335505  |

---

SCF Done: E(RB+HF-LYP) = -2747.13915723 A. U. after 1 cycles  
Zero-point correction= 0.264407 (Hartree/Particle)  
Thermal correction to Energy= 0.299001  
Thermal correction to Enthalpy= 0.299945  
Thermal correction to Gibbs Free Energy= 0.194439  
Sum of electronic and zero-point Energies= -2746.874750  
Sum of electronic and thermal Energies= -2746.840157  
Sum of electronic and thermal Enthalpies= -2746.839212  
Sum of electronic and thermal Free Energies= -2746.944718

Int3 (Na<sup>+</sup>)

Stoichiometry C7H18Cl3Na308

Standard orientation:



| Center Number | Atomic Number | Atomic Type | Coordinates (Angstroms) |           |           |
|---------------|---------------|-------------|-------------------------|-----------|-----------|
|               |               |             | X                       | Y         | Z         |
| 1             | 6             | 0           | 1.424217                | -1.423970 | -1.061787 |
| 2             | 8             | 0           | 0.402393                | -0.928725 | -1.595100 |
| 3             | 6             | 0           | 1.476929                | -2.793523 | -0.615426 |
| 4             | 6             | 0           | 2.644205                | -0.536938 | -0.848501 |
| 5             | 6             | 0           | 2.622737                | -3.301896 | -0.072511 |
| 6             | 6             | 0           | 3.845204                | -1.221107 | -0.285316 |
| 7             | 6             | 0           | 3.823242                | -2.517871 | 0.096830  |
| 8             | 1             | 0           | 0.577467                | -3.394415 | -0.706085 |
| 9             | 6             | 0           | 2.130244                | 0.747829  | -0.081475 |
| 10            | 1             | 0           | 2.905823                | -0.112375 | -1.830342 |
| 11            | 1             | 0           | 2.632394                | -4.338445 | 0.258865  |
| 12            | 1             | 0           | 4.733715                | -0.611122 | -0.148452 |
| 13            | 1             | 0           | 4.696473                | -2.984160 | 0.544845  |
| 14            | 17            | 0           | 1.914929                | 0.211253  | 1.785819  |
| 15            | 17            | 0           | 3.535394                | 1.964230  | -0.059249 |
| 16            | 17            | 0           | -1.944095               | -2.370414 | 1.015268  |
| 17            | 11            | 0           | 0.080063                | 1.562713  | -1.259405 |
| 18            | 11            | 0           | -0.709678               | -0.463673 | 2.229128  |
| 19            | 8             | 0           | -2.043485               | 1.213864  | 2.872569  |
| 20            | 1             | 0           | -2.570906               | 1.335967  | 3.674431  |
| 21            | 1             | 0           | -2.625472               | 1.495693  | 2.086430  |
| 22            | 8             | 0           | -0.773429               | 2.994418  | 0.486258  |
| 23            | 1             | 0           | -1.733463               | 2.716352  | 0.581859  |
| 24            | 1             | 0           | -0.403133               | 2.946169  | 1.381481  |
| 25            | 1             | 0           | 1.799968                | 3.753320  | -1.388344 |
| 26            | 8             | 0           | 0.874395                | 3.741692  | -1.684906 |
| 27            | 1             | 0           | 0.347407                | 3.972140  | -0.893829 |
| 28            | 11            | 0           | -1.856867               | -1.332154 | -1.404312 |
| 29            | 8             | 0           | -3.205867               | 1.865055  | 0.628662  |
| 30            | 1             | 0           | -3.892793               | 2.549185  | 0.615393  |
| 31            | 1             | 0           | -2.653078               | 1.393340  | -0.797418 |
| 32            | 8             | 0           | -2.150424               | 1.015883  | -1.601120 |
| 33            | 1             | 0           | -2.803070               | 0.974560  | -2.318764 |
| 34            | 1             | 0           | -4.152925               | 0.365467  | 0.477927  |
| 35            | 8             | 0           | -4.579365               | -0.513264 | 0.285487  |
| 36            | 1             | 0           | -4.028936               | -1.167597 | 0.761531  |
| 37            | 8             | 0           | -4.005097               | -1.150274 | -2.251784 |
| 38            | 1             | 0           | -4.387138               | -0.915588 | -1.353820 |
| 39            | 1             | 0           | -4.650537               | -1.724734 | -2.687886 |

SCF Done: E(RB3LYP) = -2747.17054342 A. U. after 1 cycles  
 Zero-point correction= 0.267479 (Hartree/Particle)  
 Thermal correction to Energy= 0.301860  
 Thermal correction to Enthalpy= 0.302805  
 Thermal correction to Gibbs Free Energy= 0.199615  
 Sum of electronic and zero-point Energies= -2746.903064  
 Sum of electronic and thermal Energies= -2746.868683  
 Sum of electronic and thermal Enthalpies= -2746.867739  
 Sum of electronic and thermal Free Energies= -2746.970928
